# Supplementary material
Source: PubMed Central journal article supplement (PMC5629338)

**Chromosome 1 1Mb Windows**

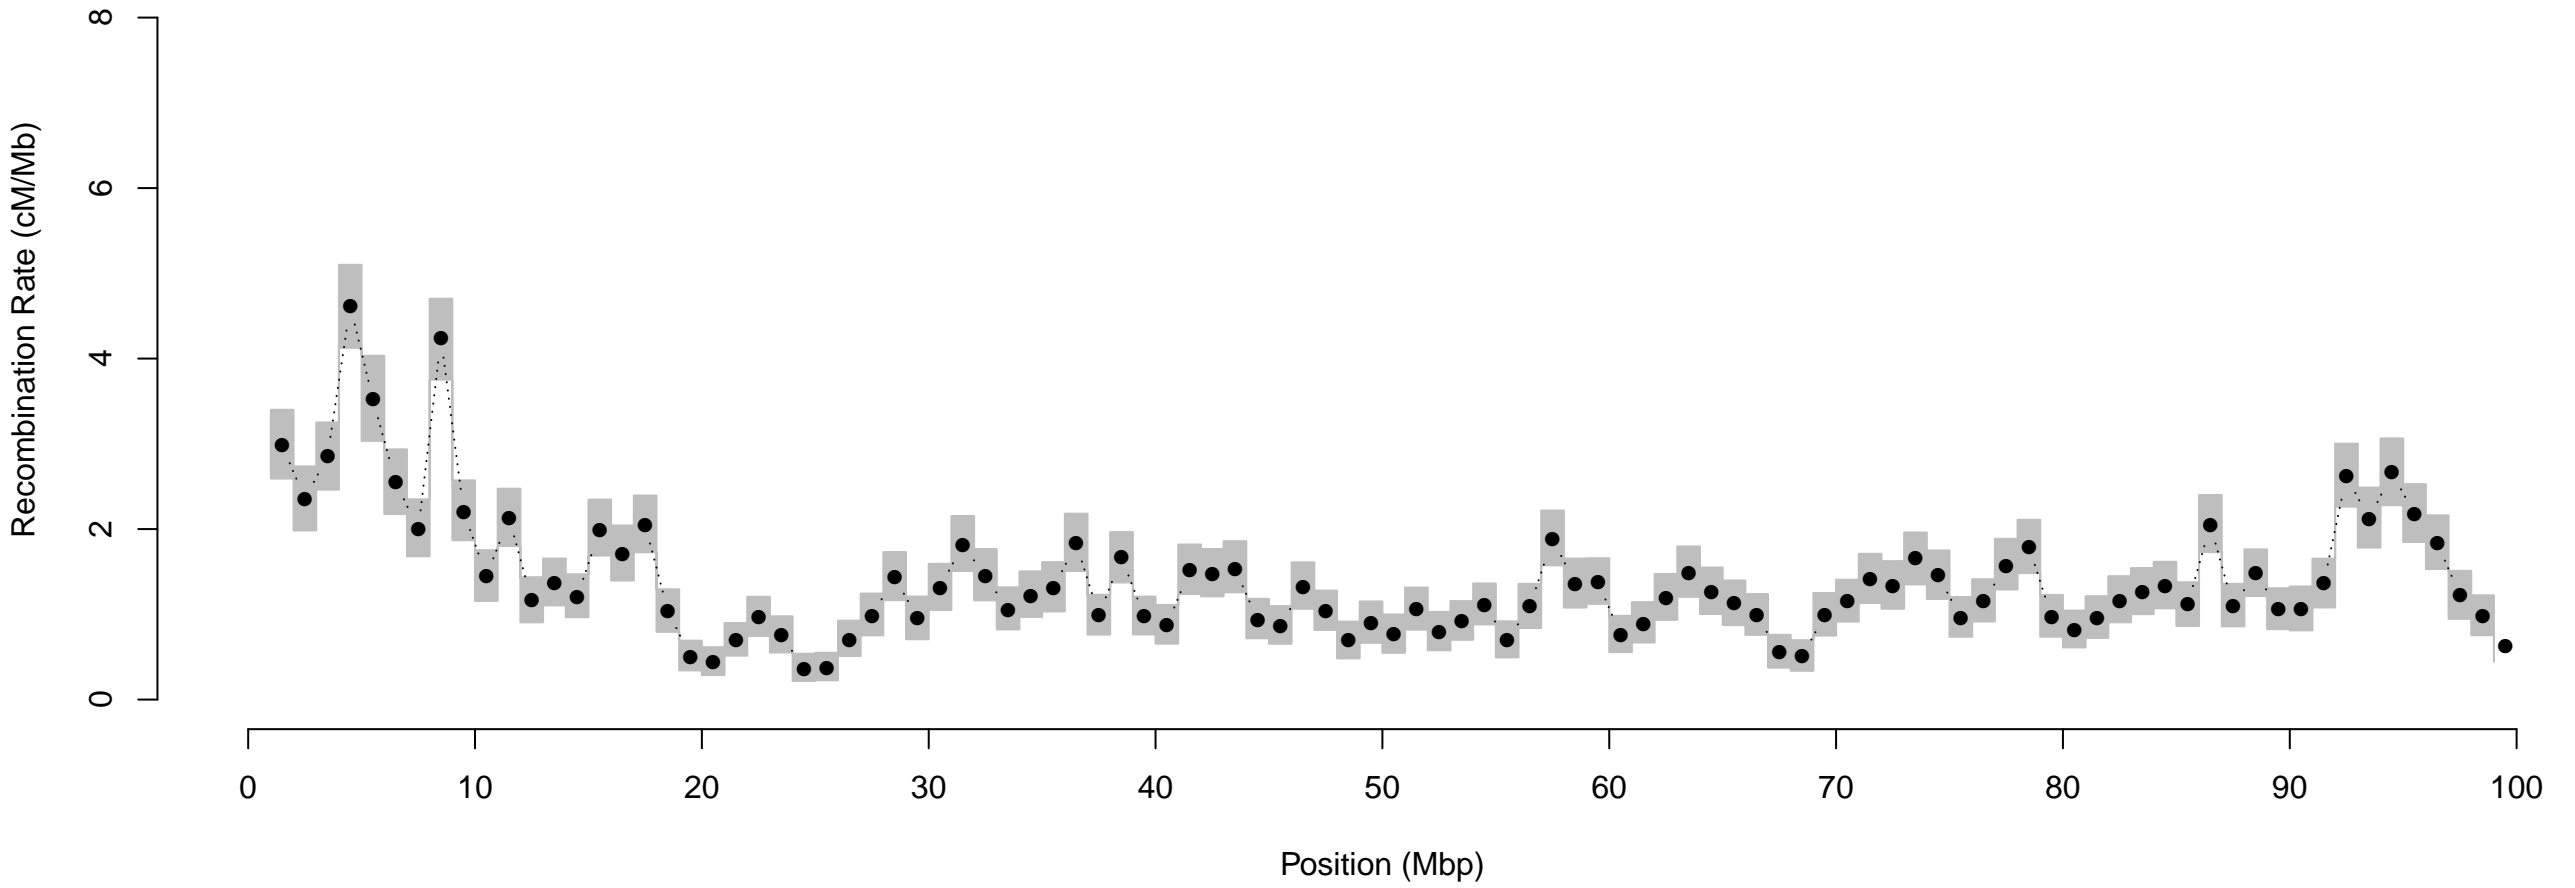

**Chromosome 1 SNP array**

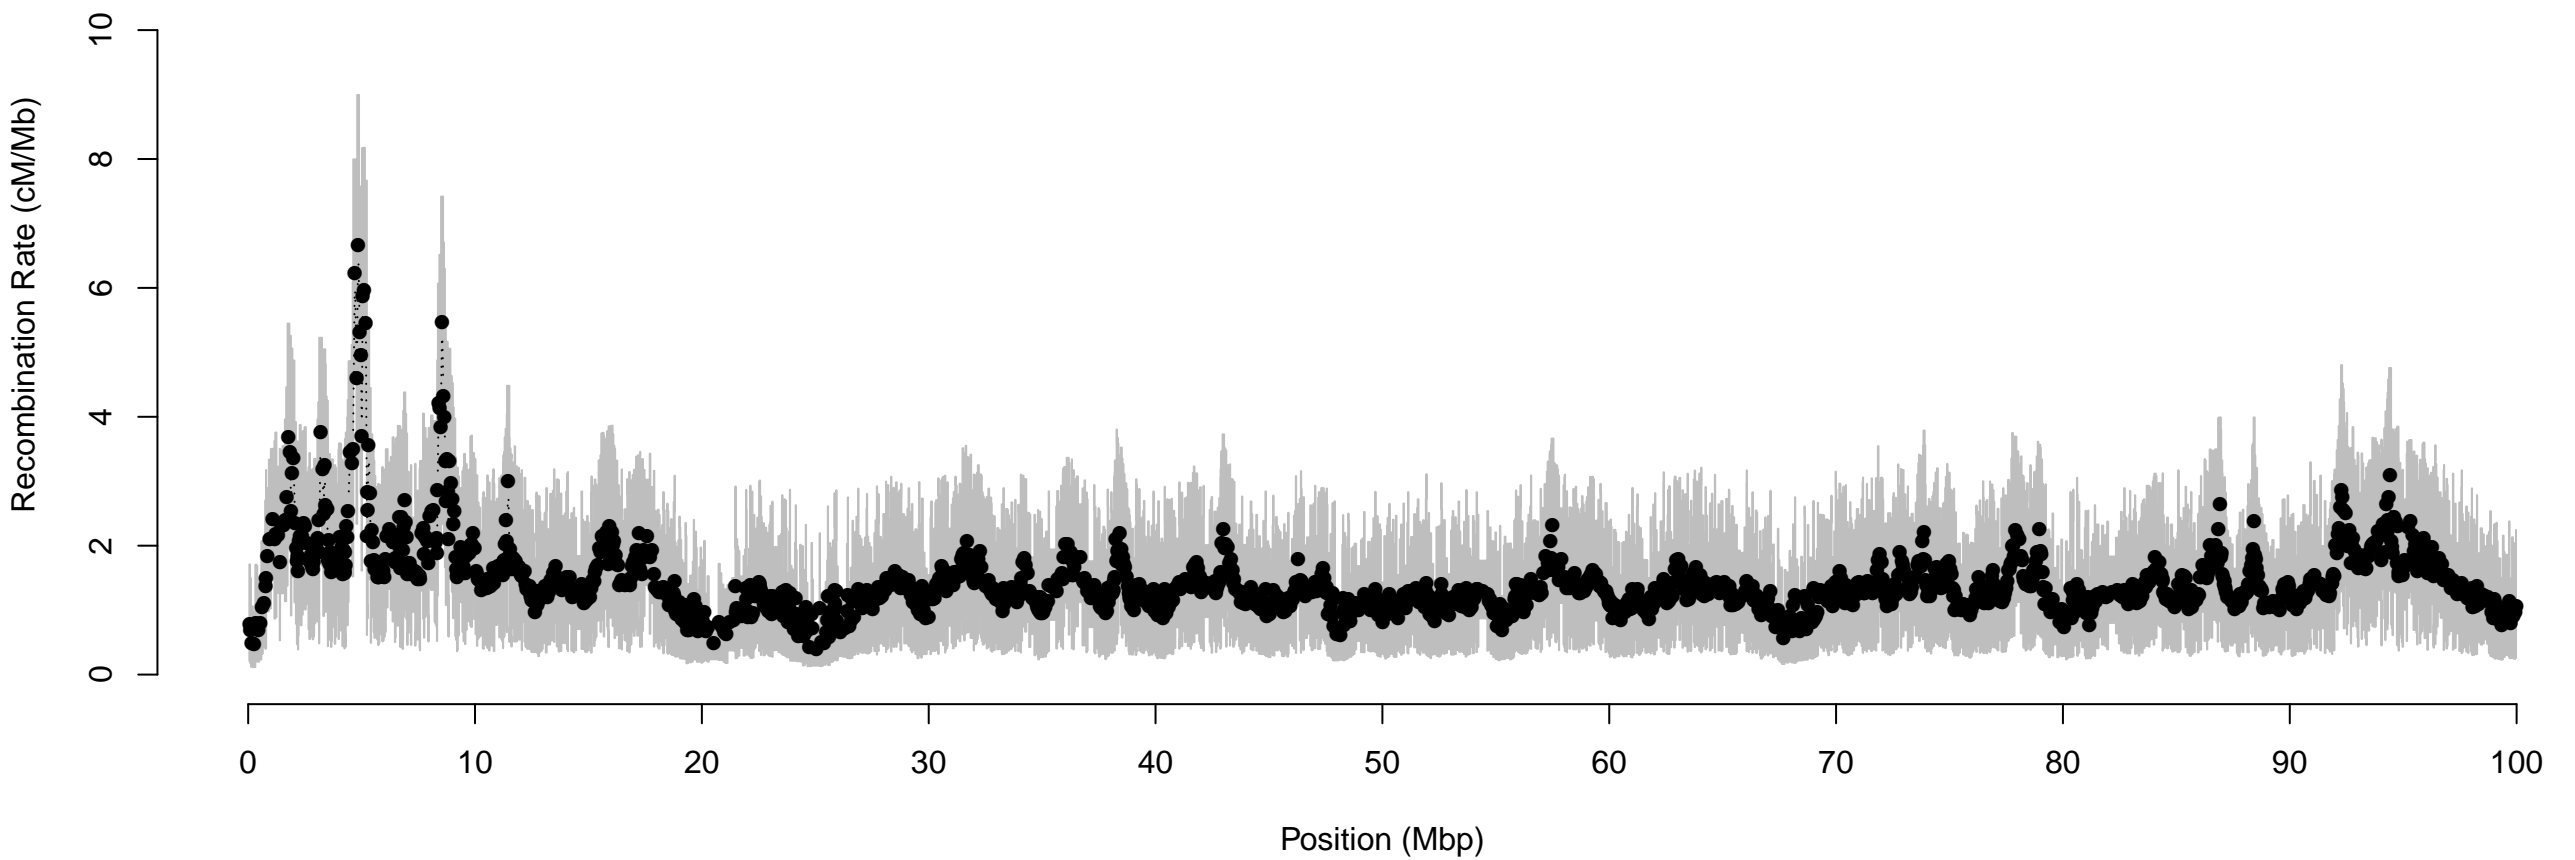

**Chromosome 1 1Mb Windows**

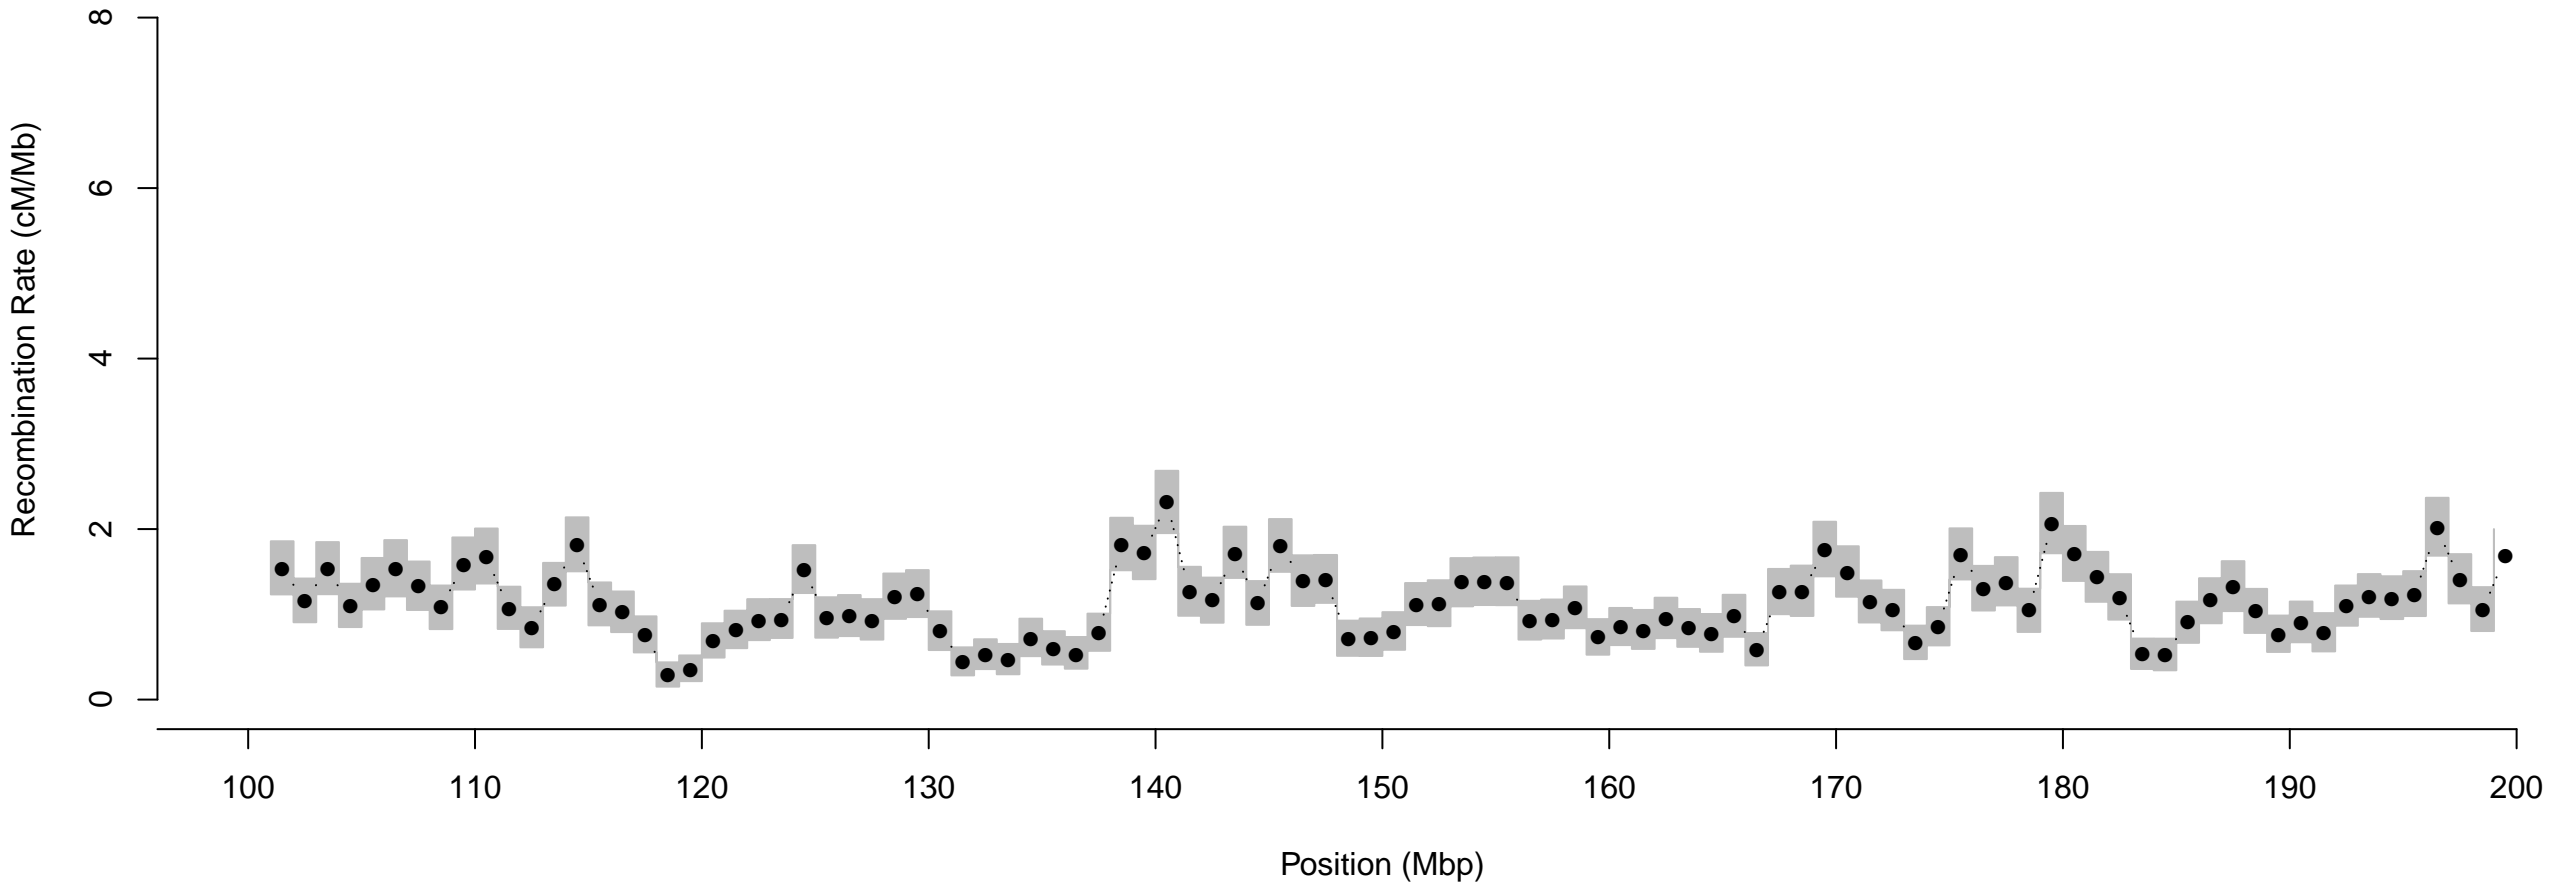

**Chromosome 1 SNP array**

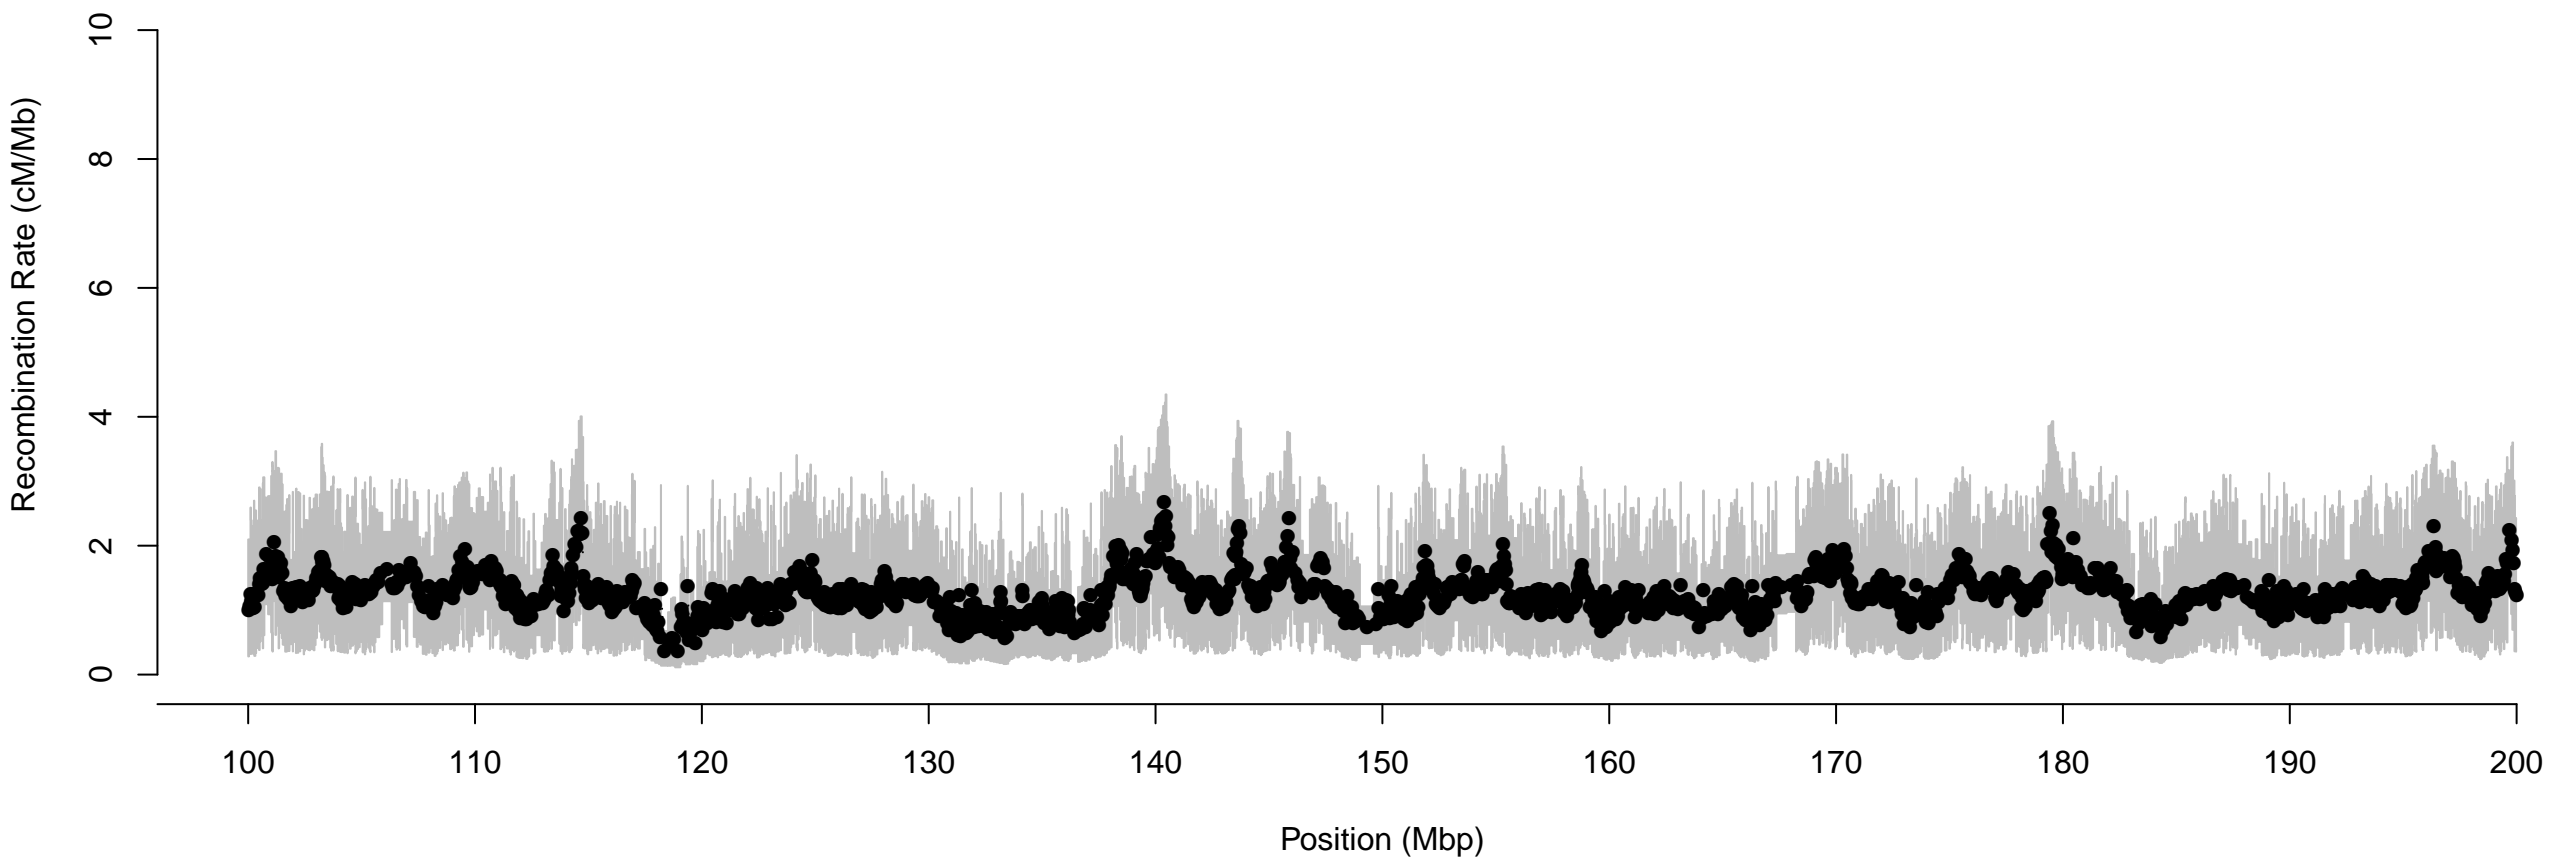

### Chromosome 1 1Mb Windows

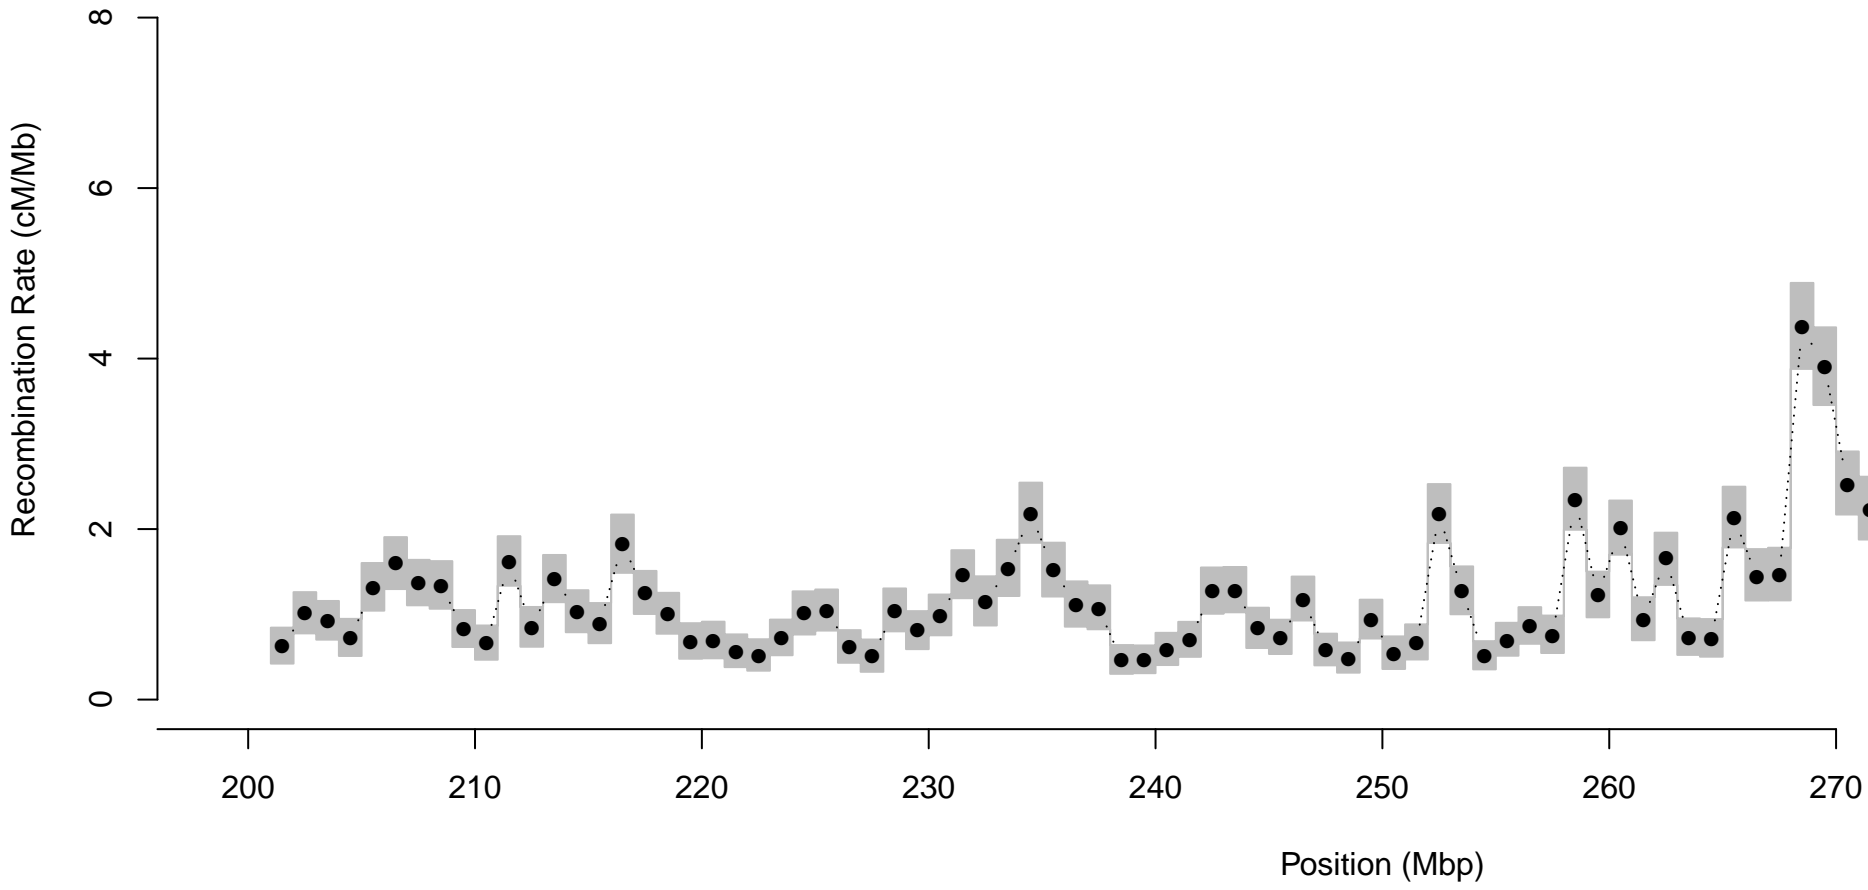

### Chromosome 1 SNP array

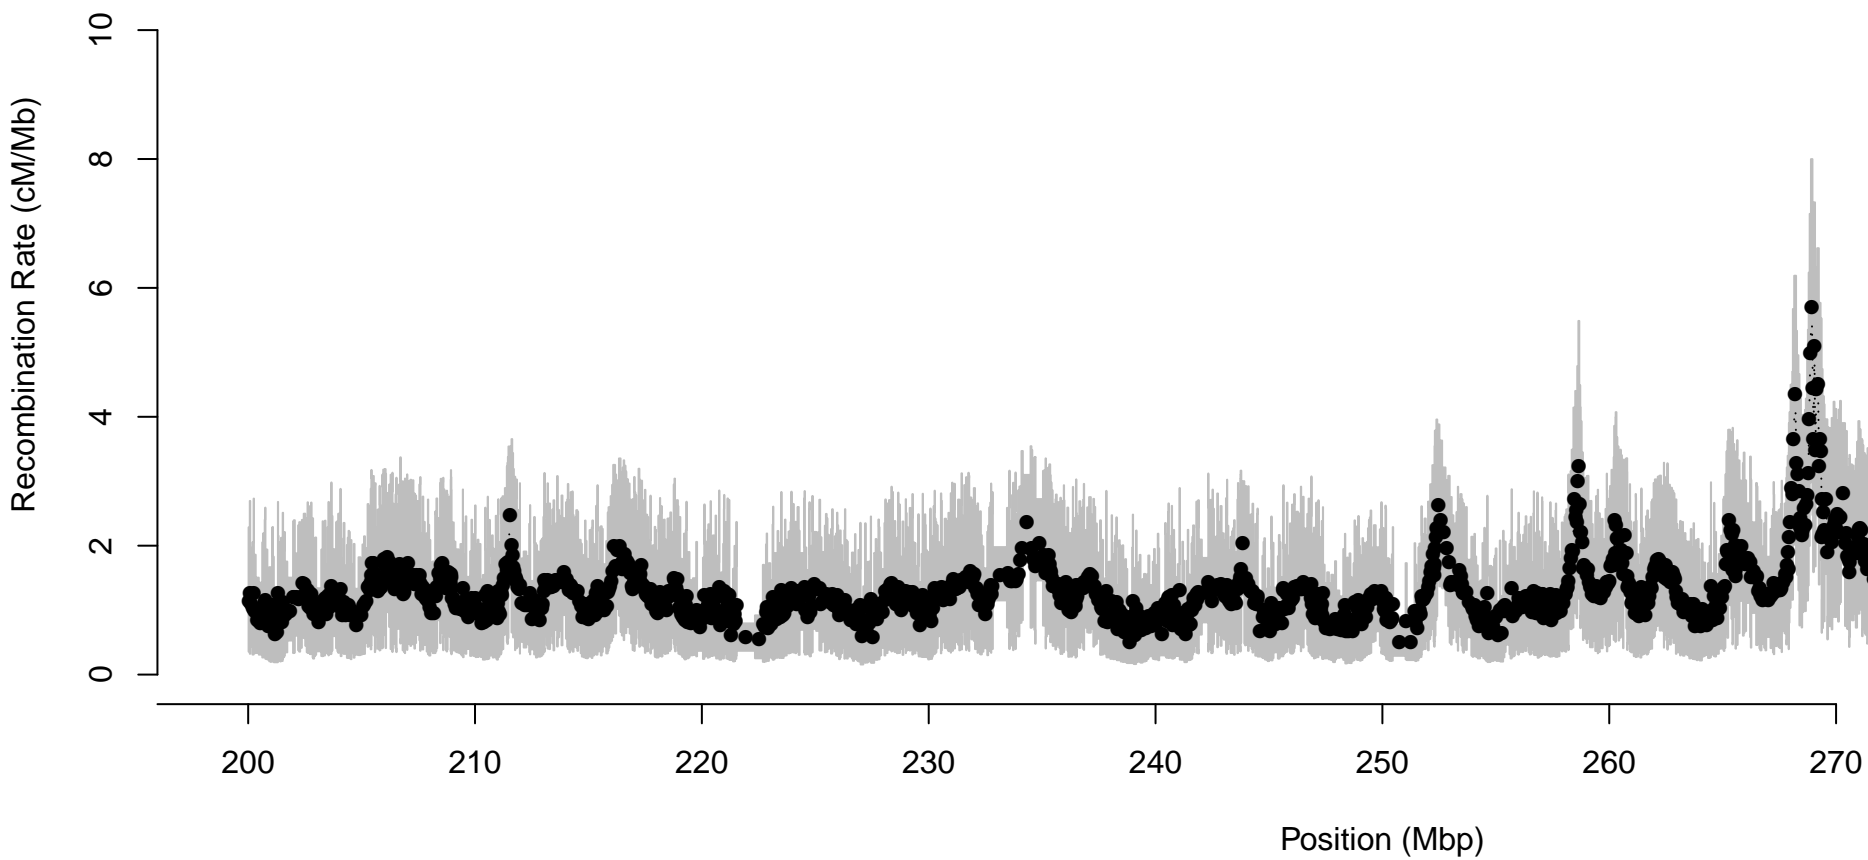

**Chromosome 2 1Mb Windows**

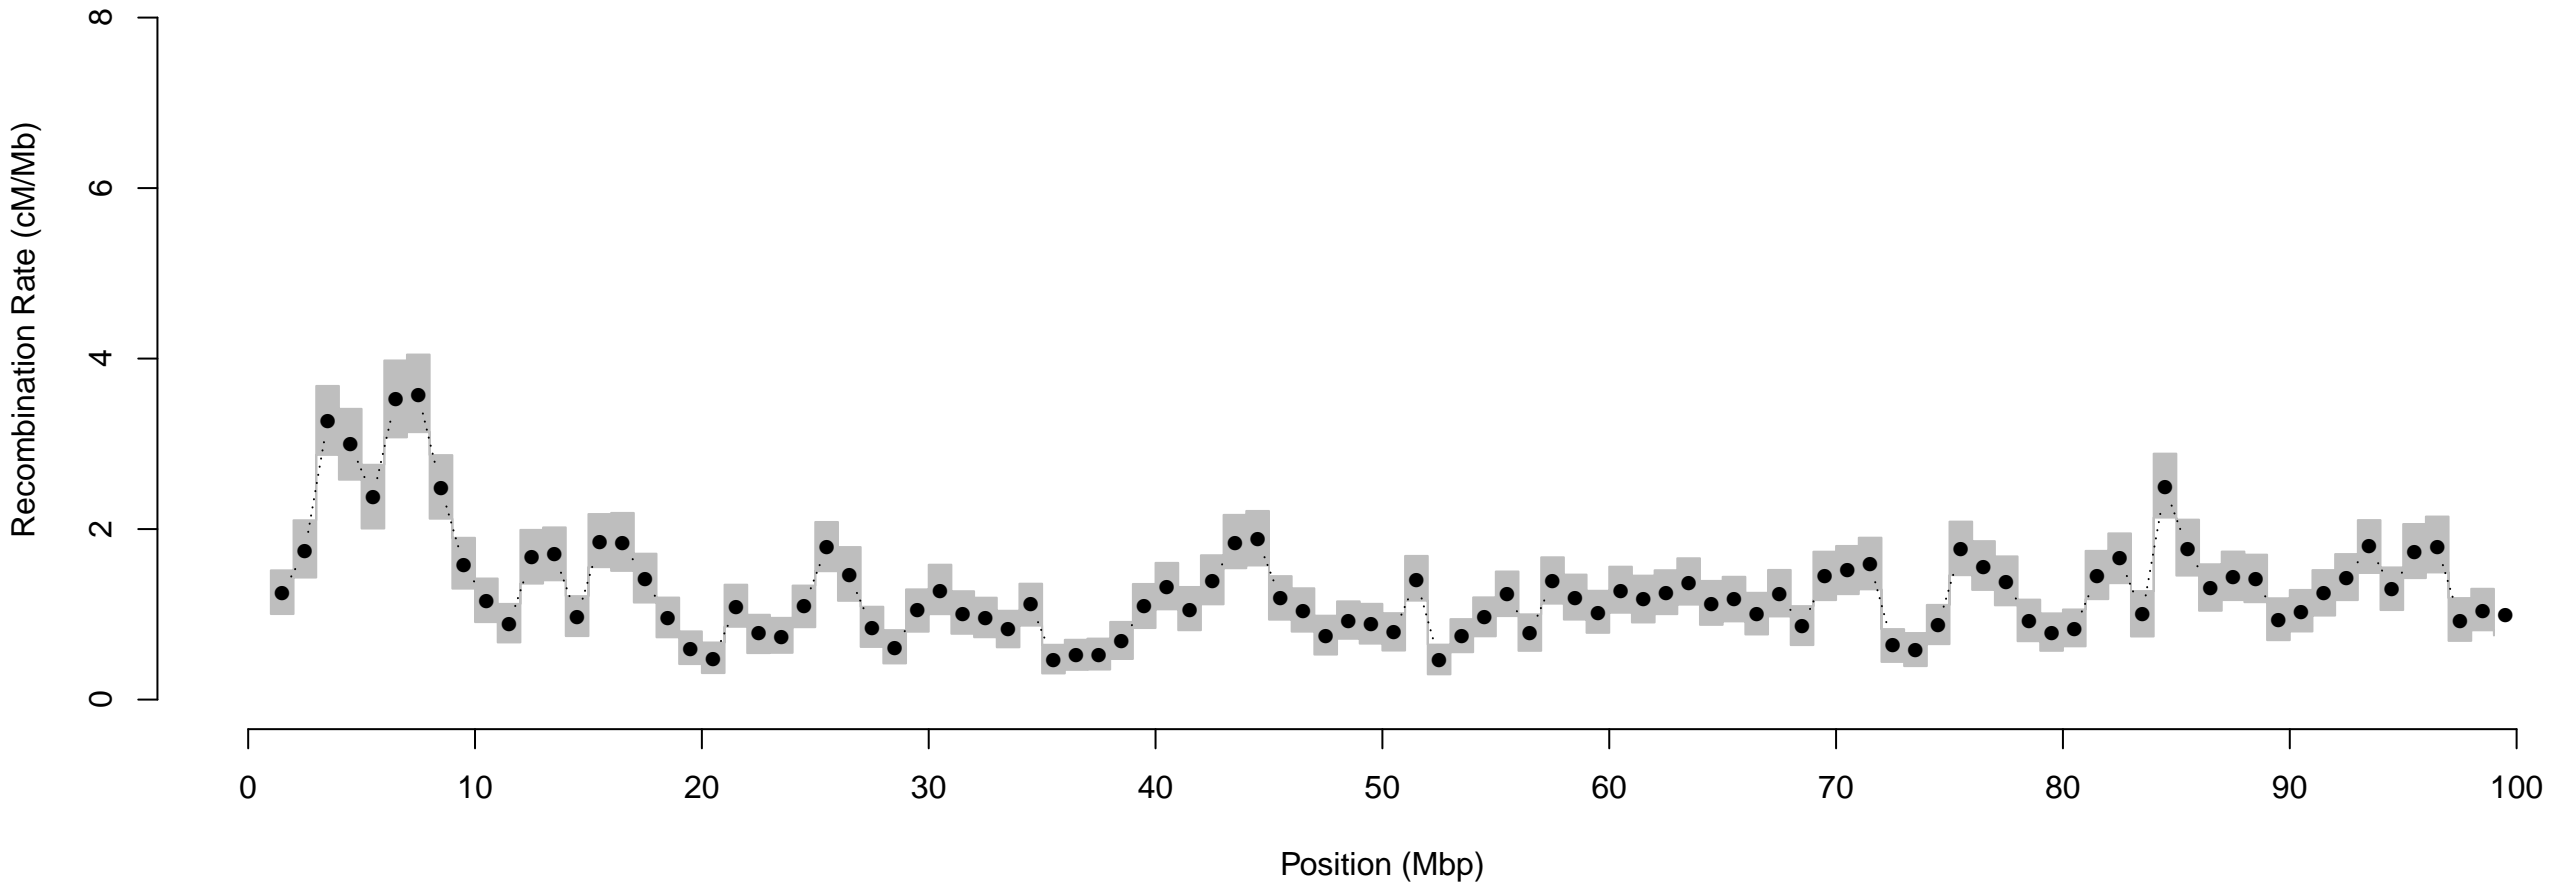

**Chromosome 2 SNP array**

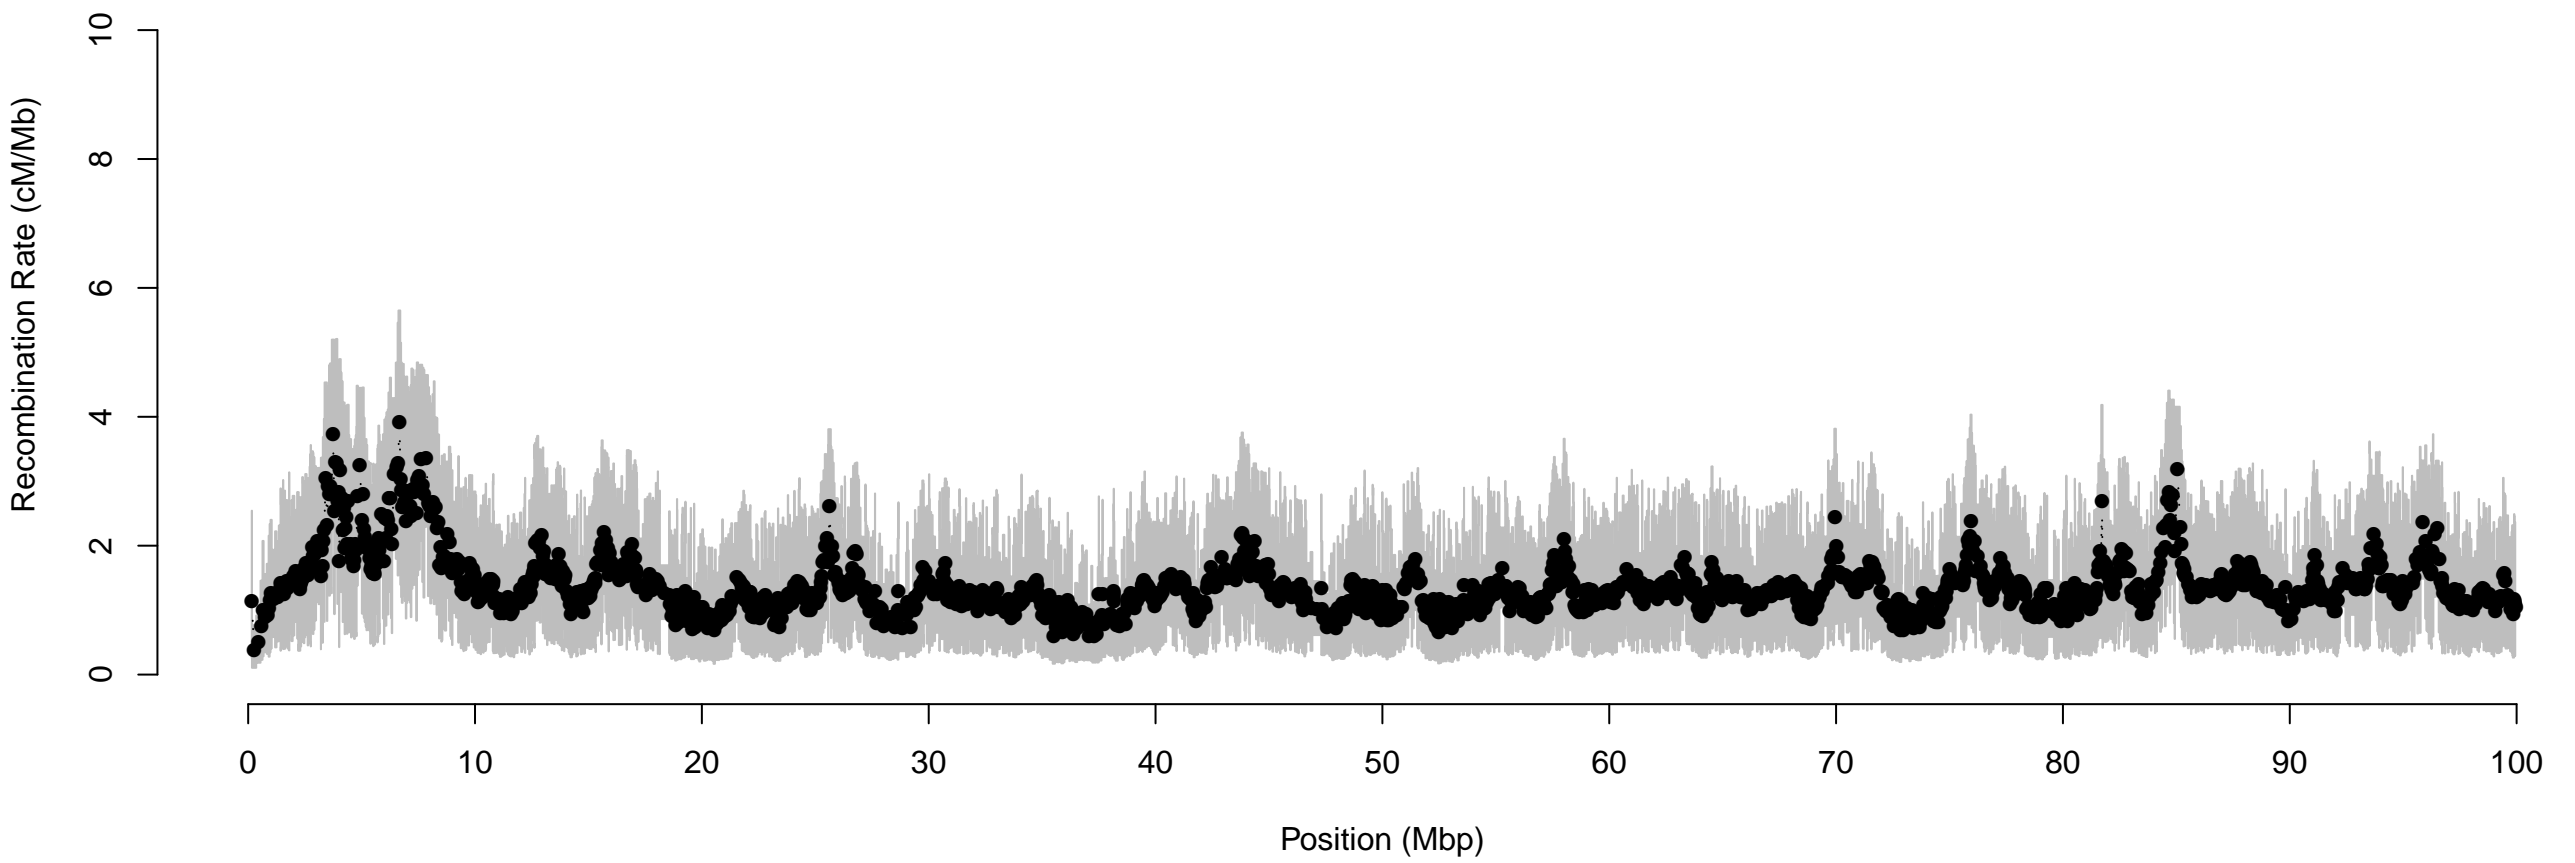

Chromosome 2 1Mb Windows

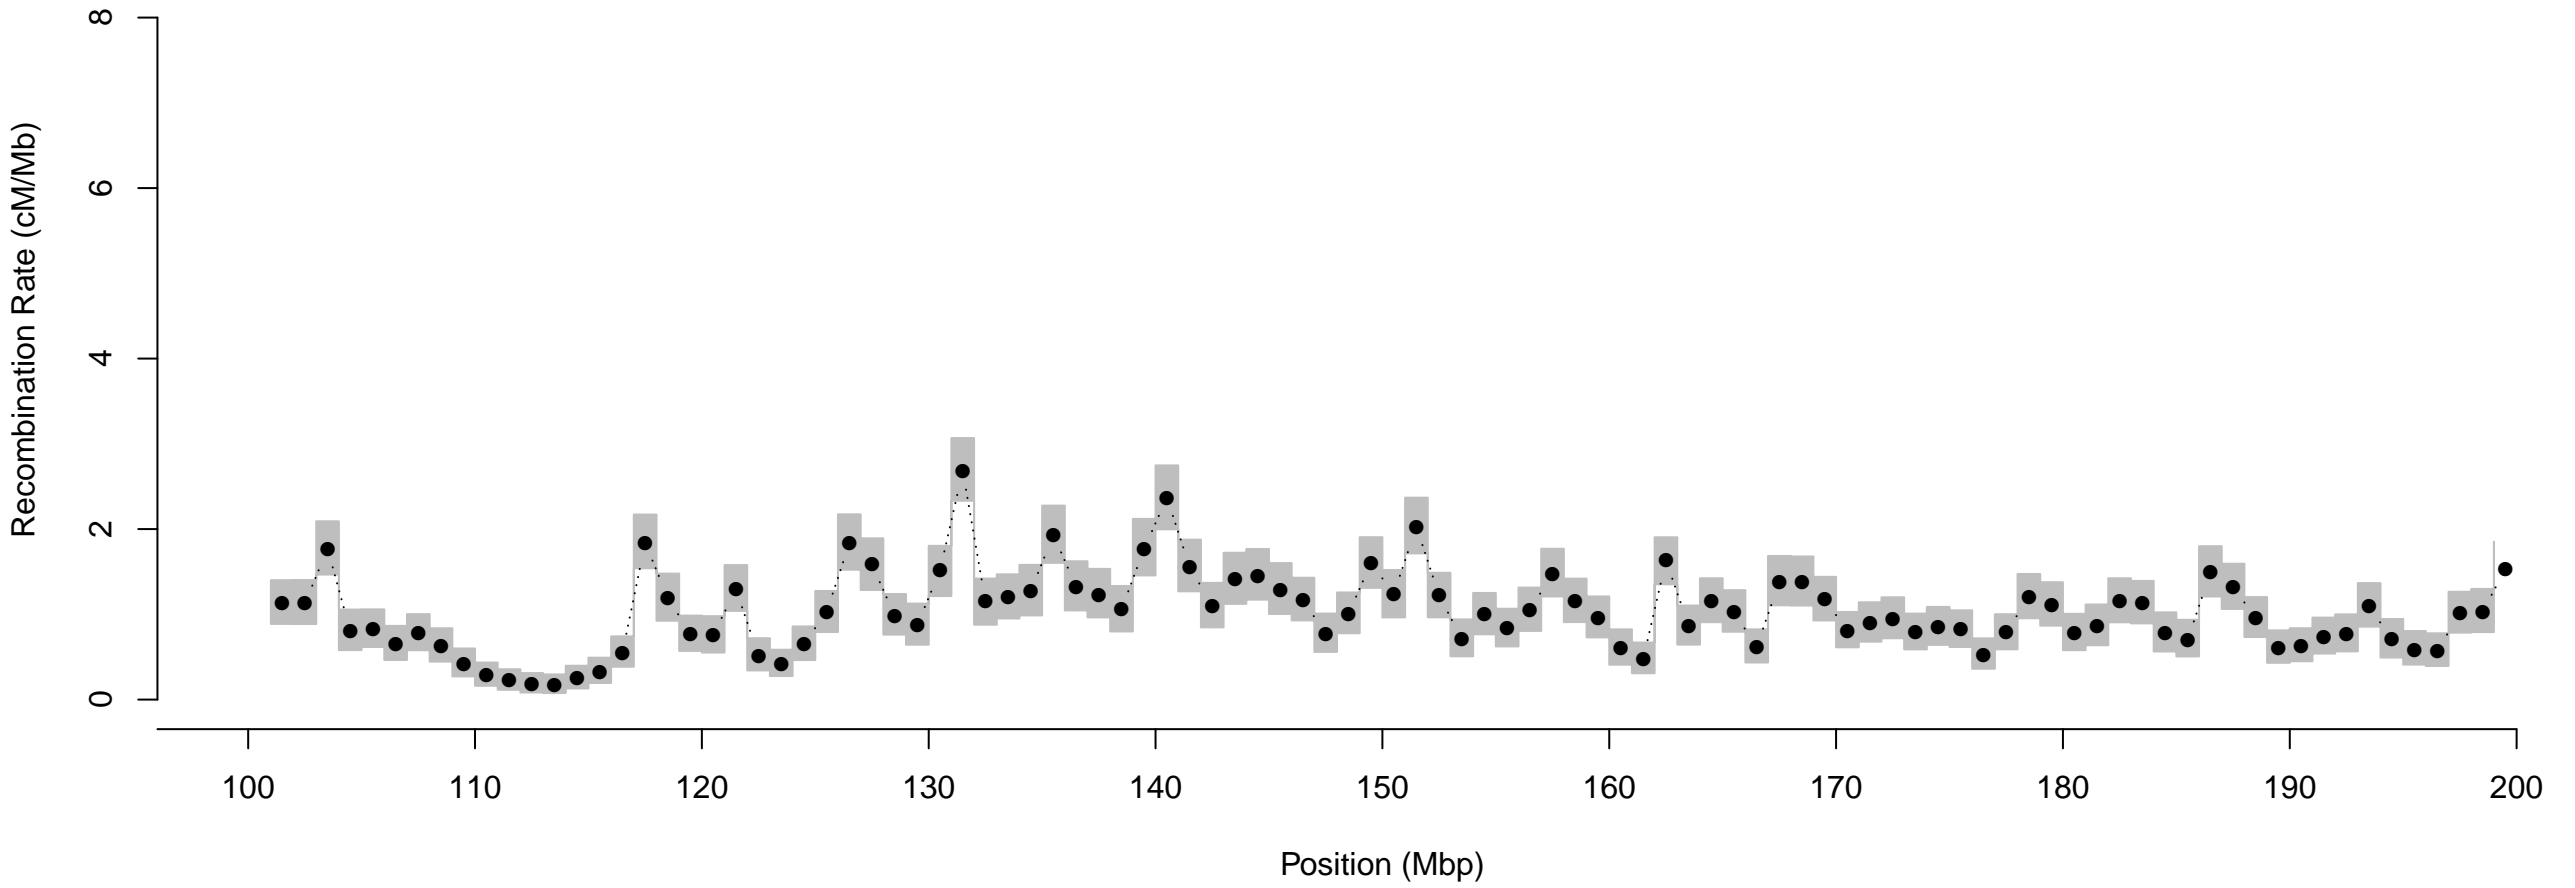

Chromosome 2 SNP array

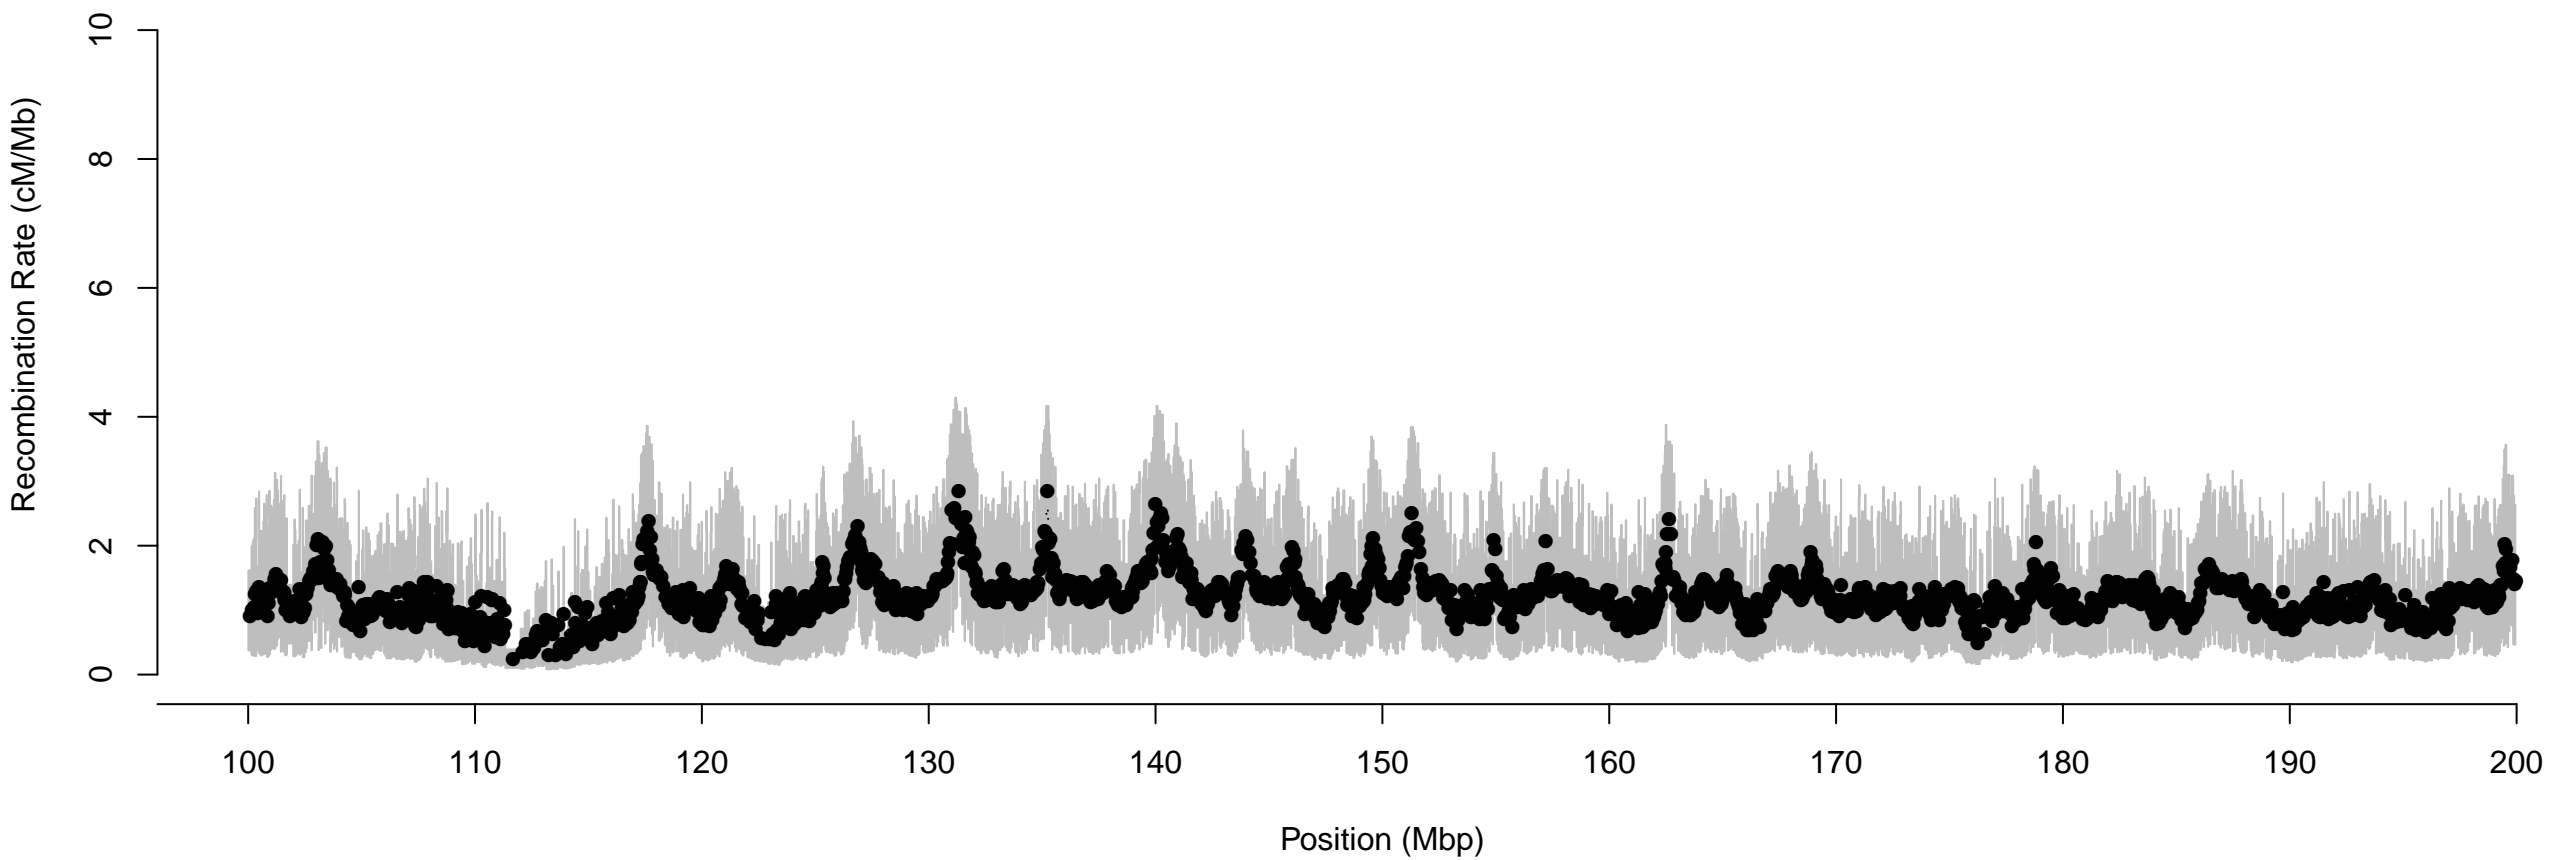

**Chromosome 2 1Mb Windows**

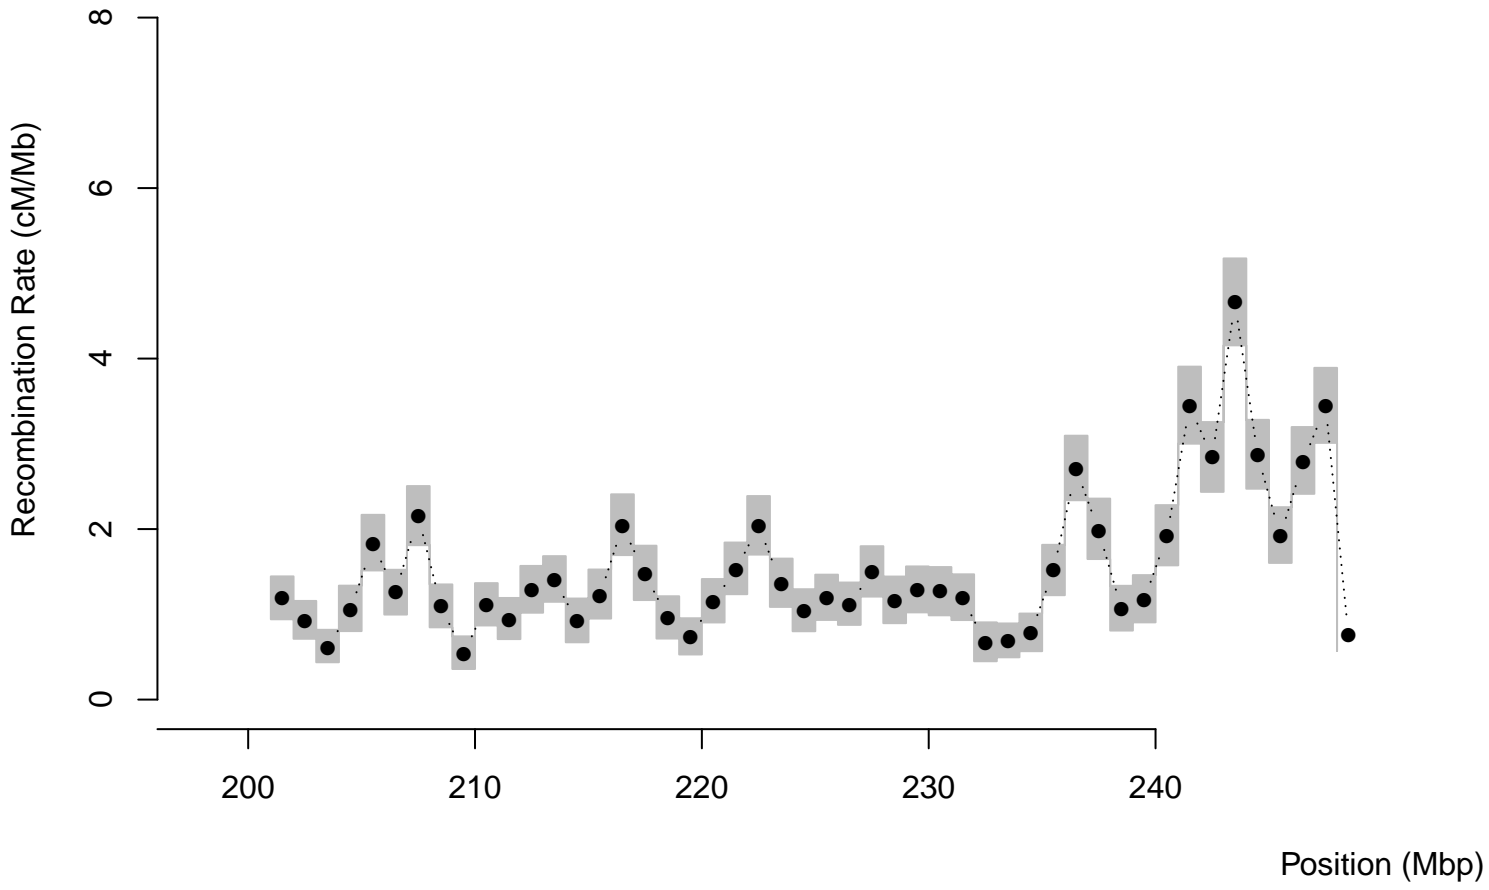

**Chromosome 2 SNP array**

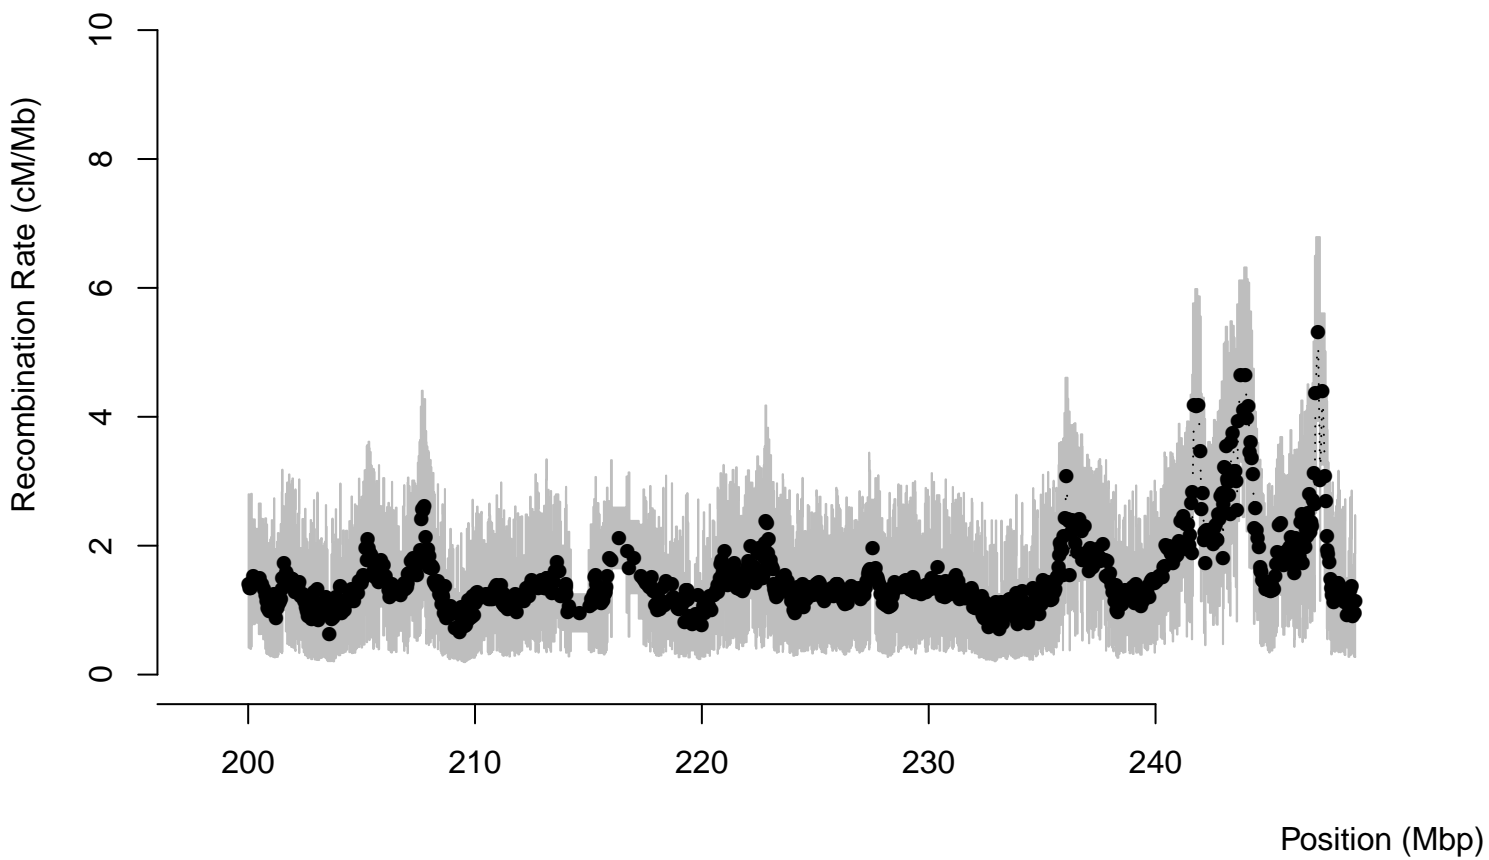

**Chromosome 3 1Mb Windows**

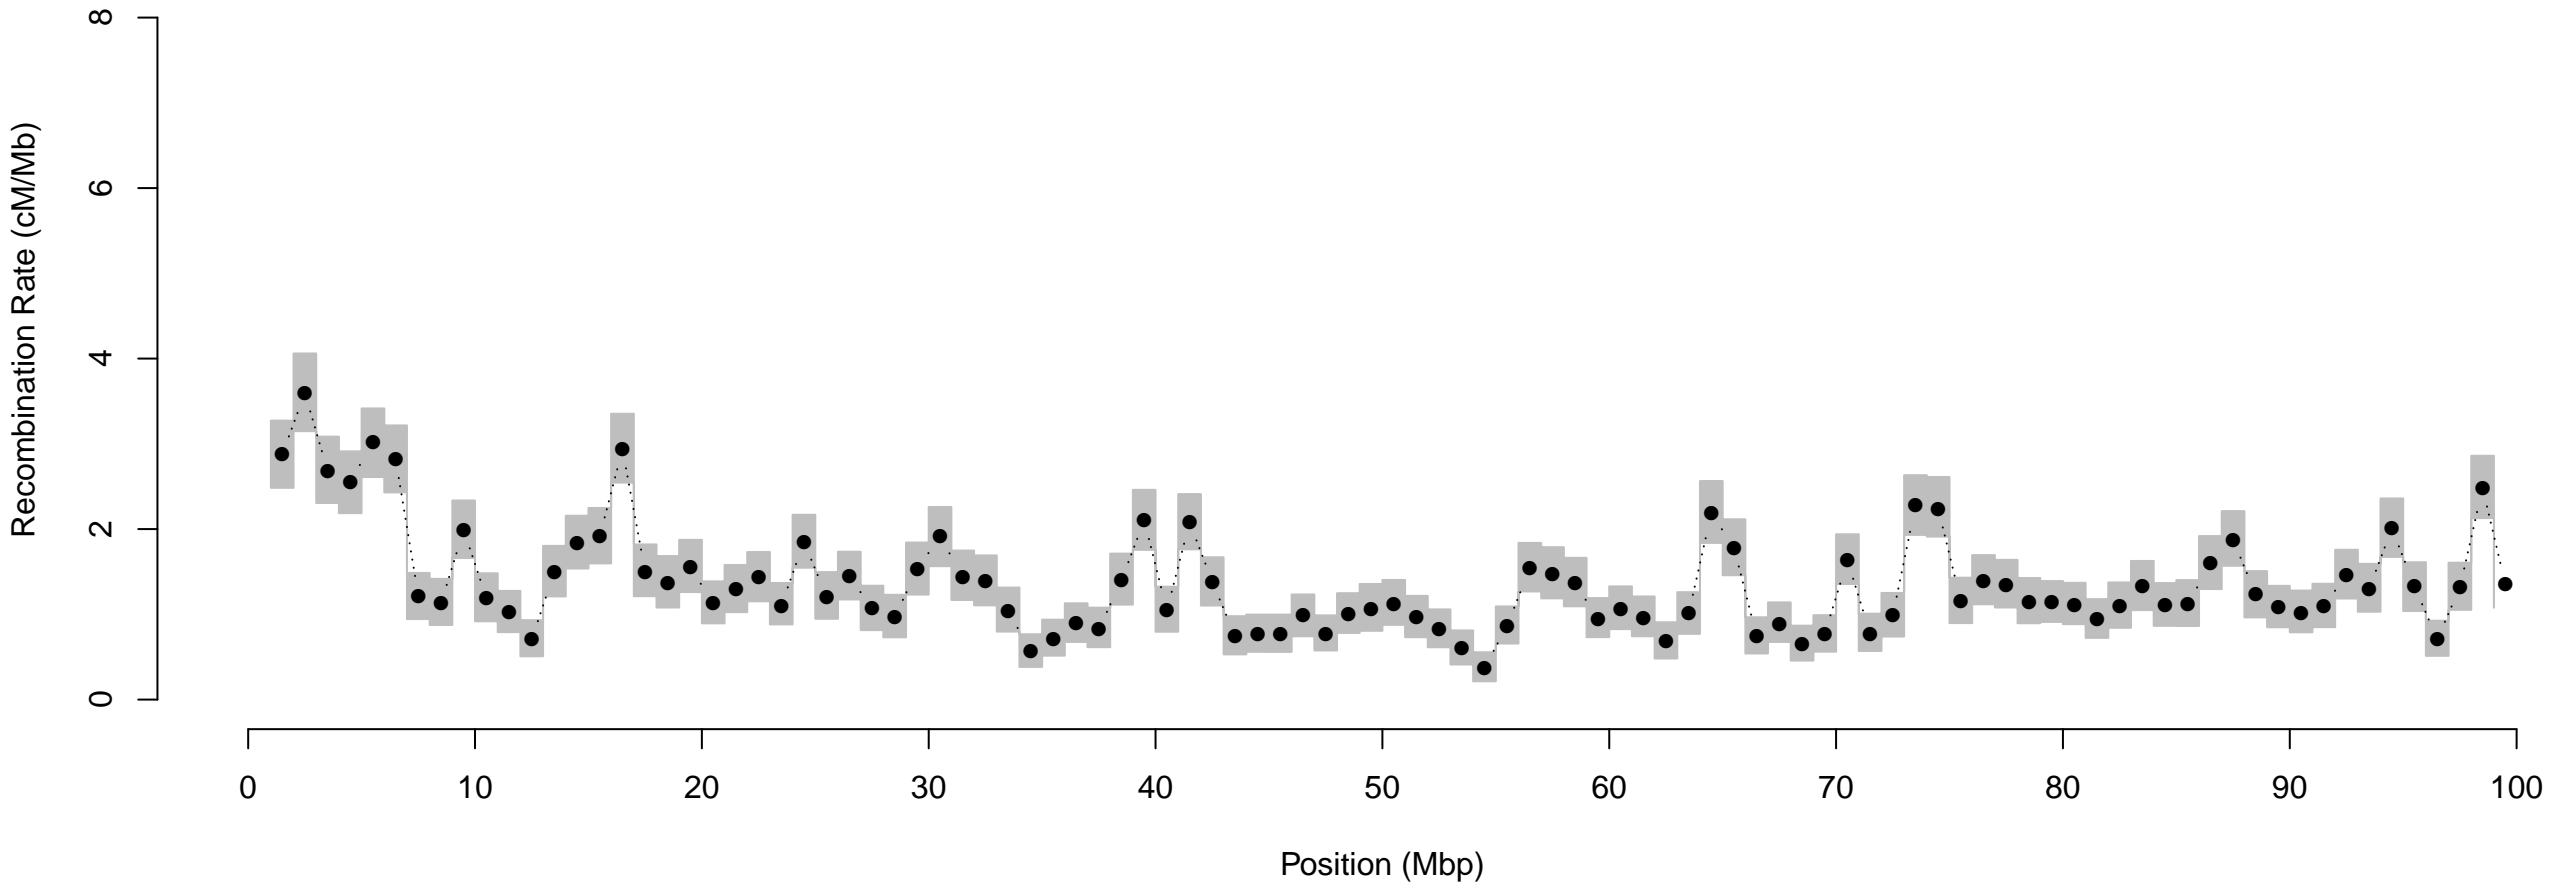

**Chromosome 3 SNP array**

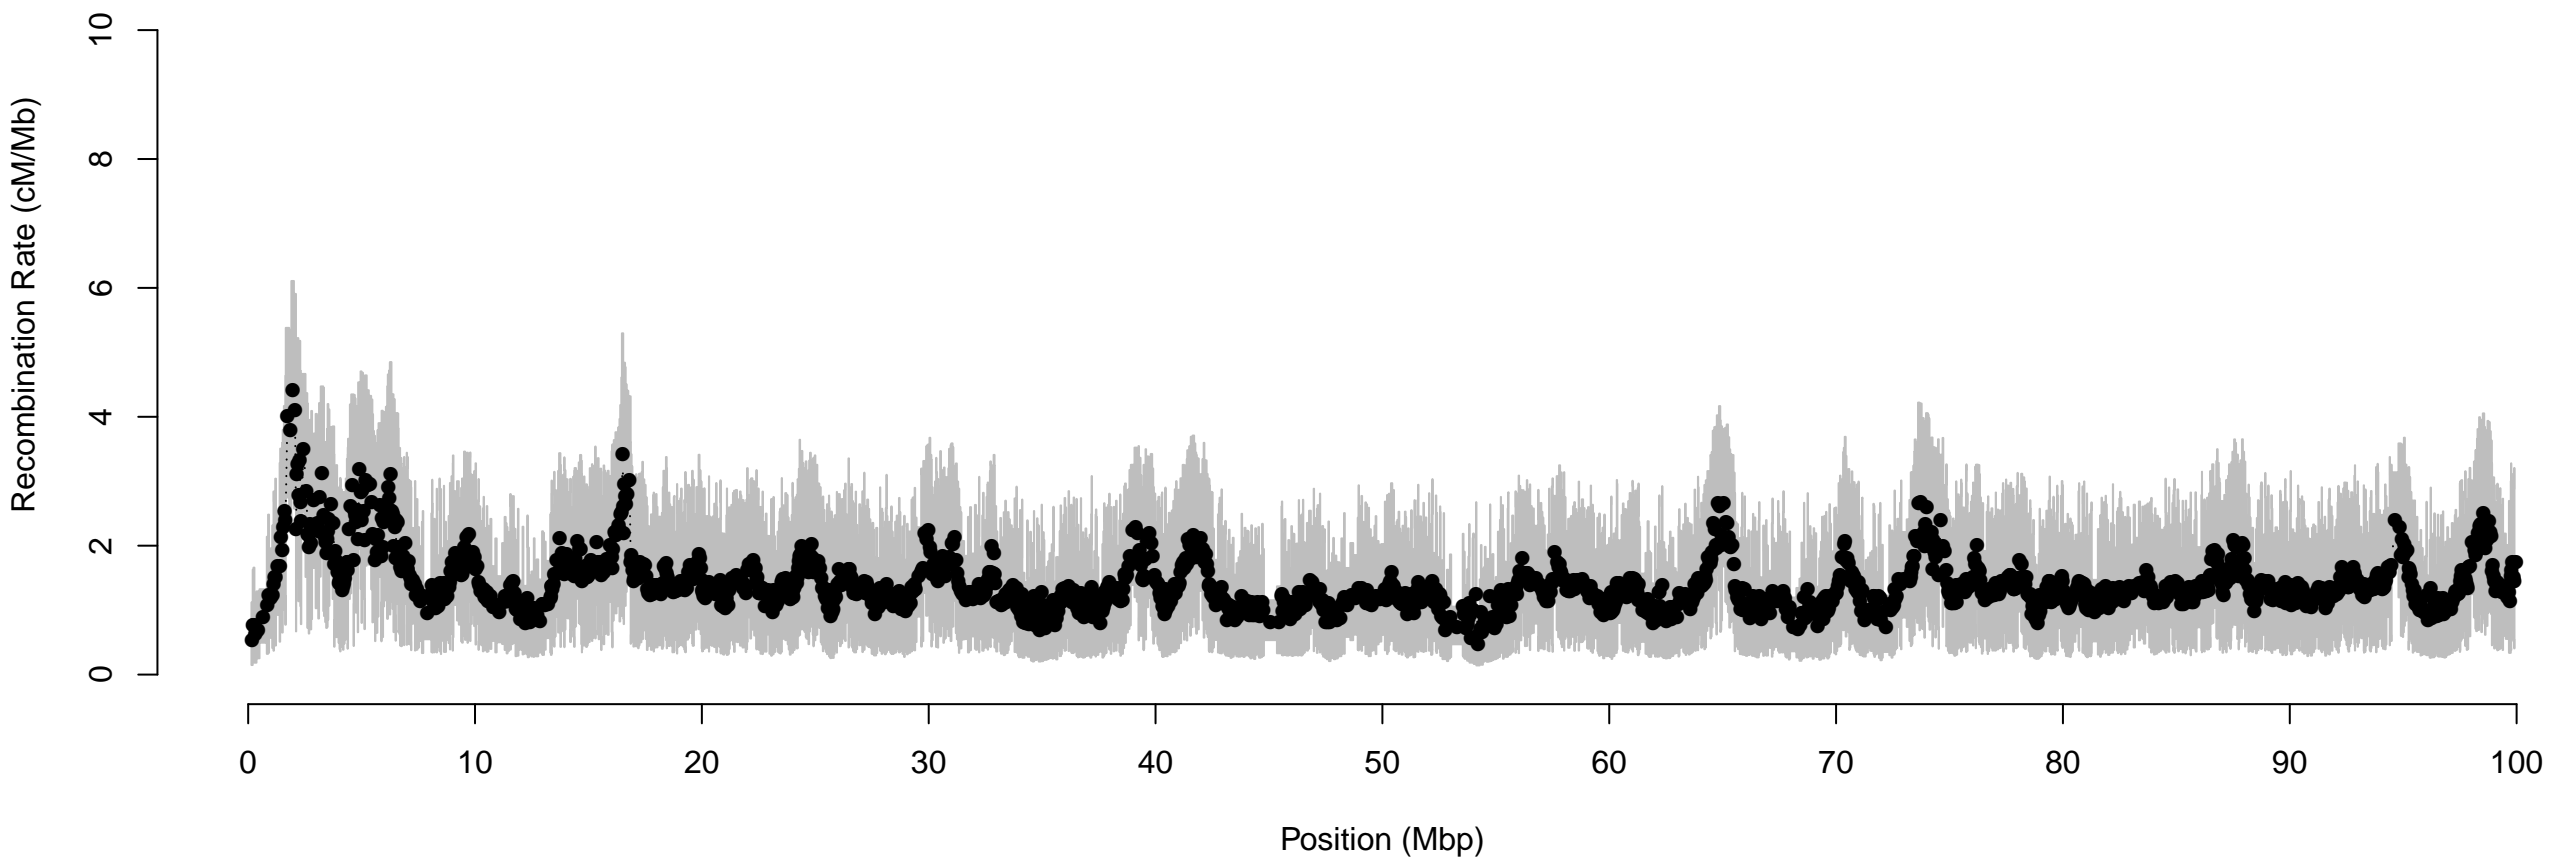

**Chromosome 3 1Mb Windows**

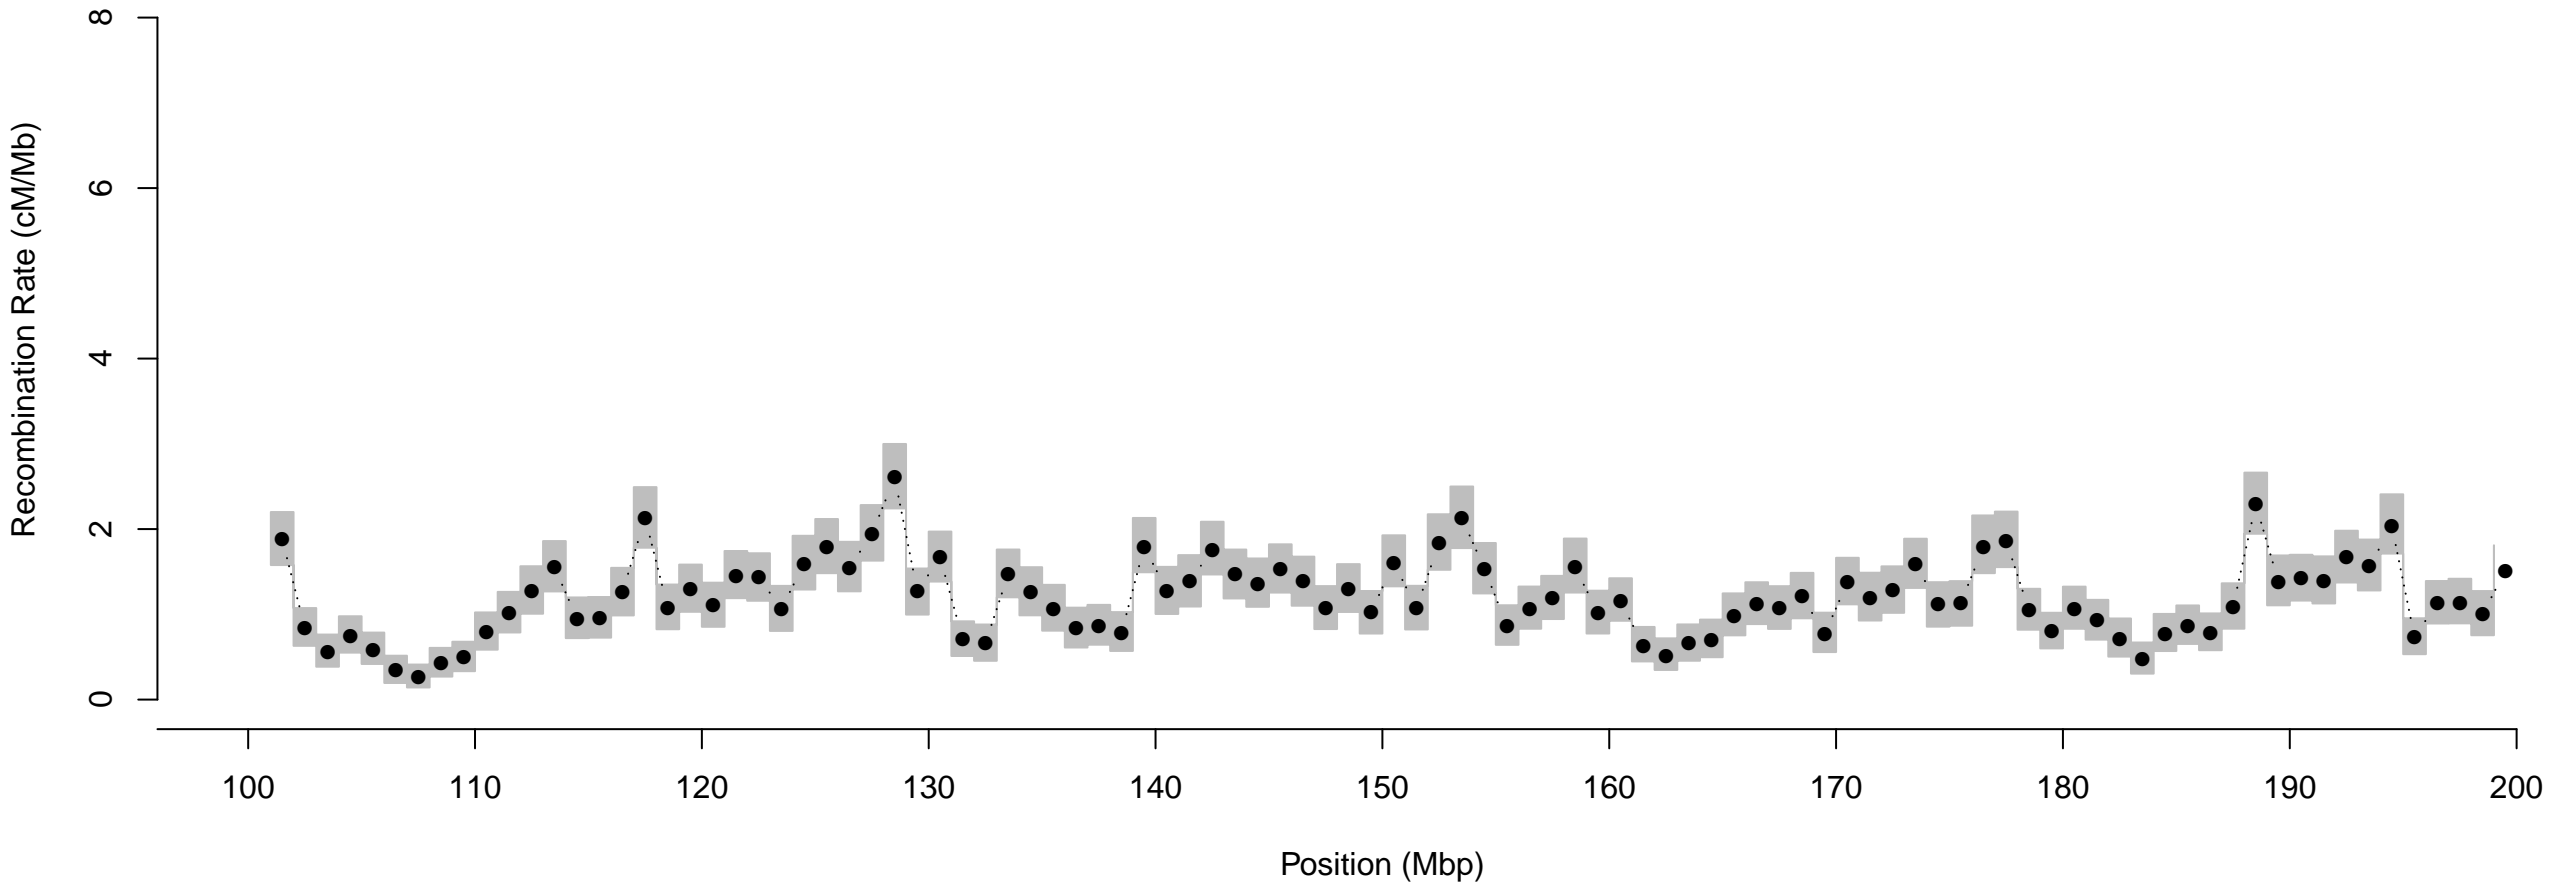

**Chromosome 3 SNP array**

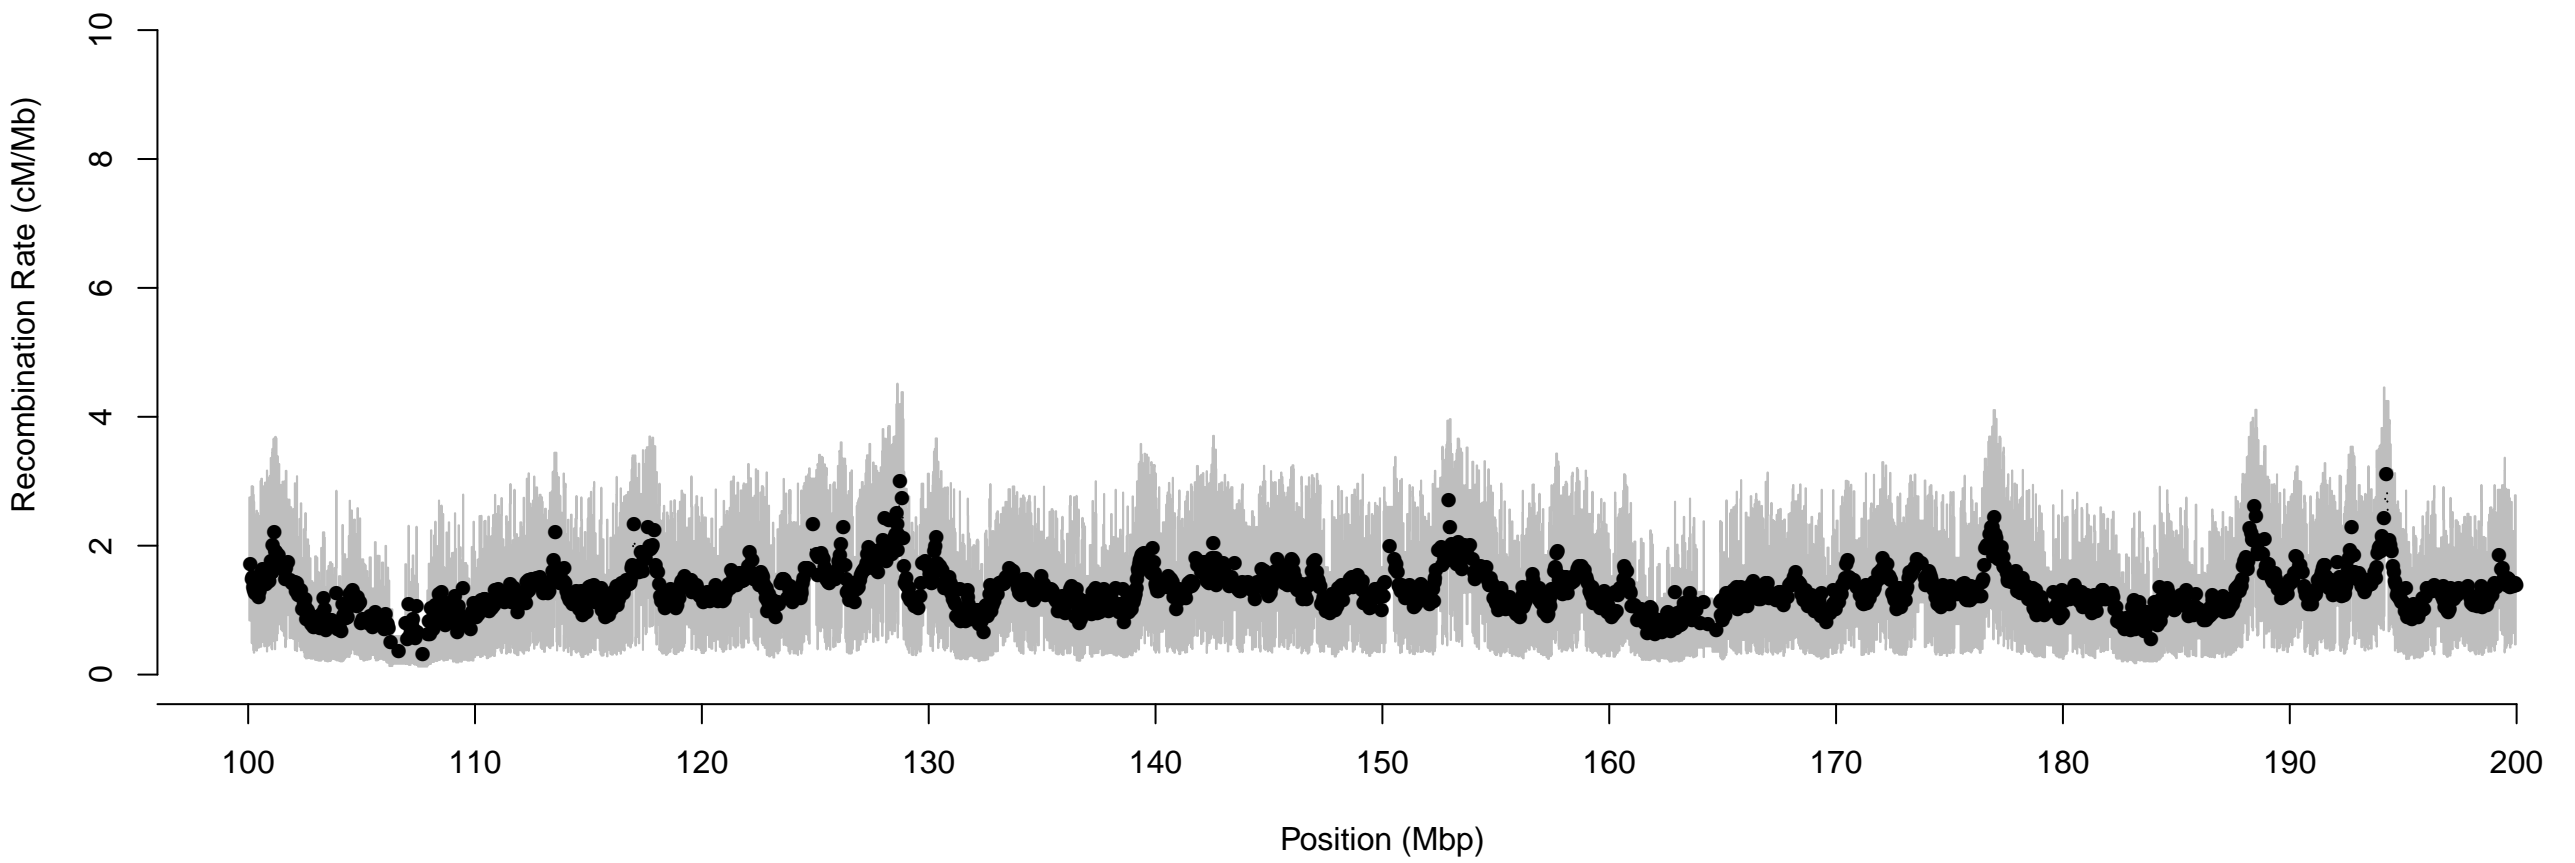



### Chromosome 3 1Mb Windows

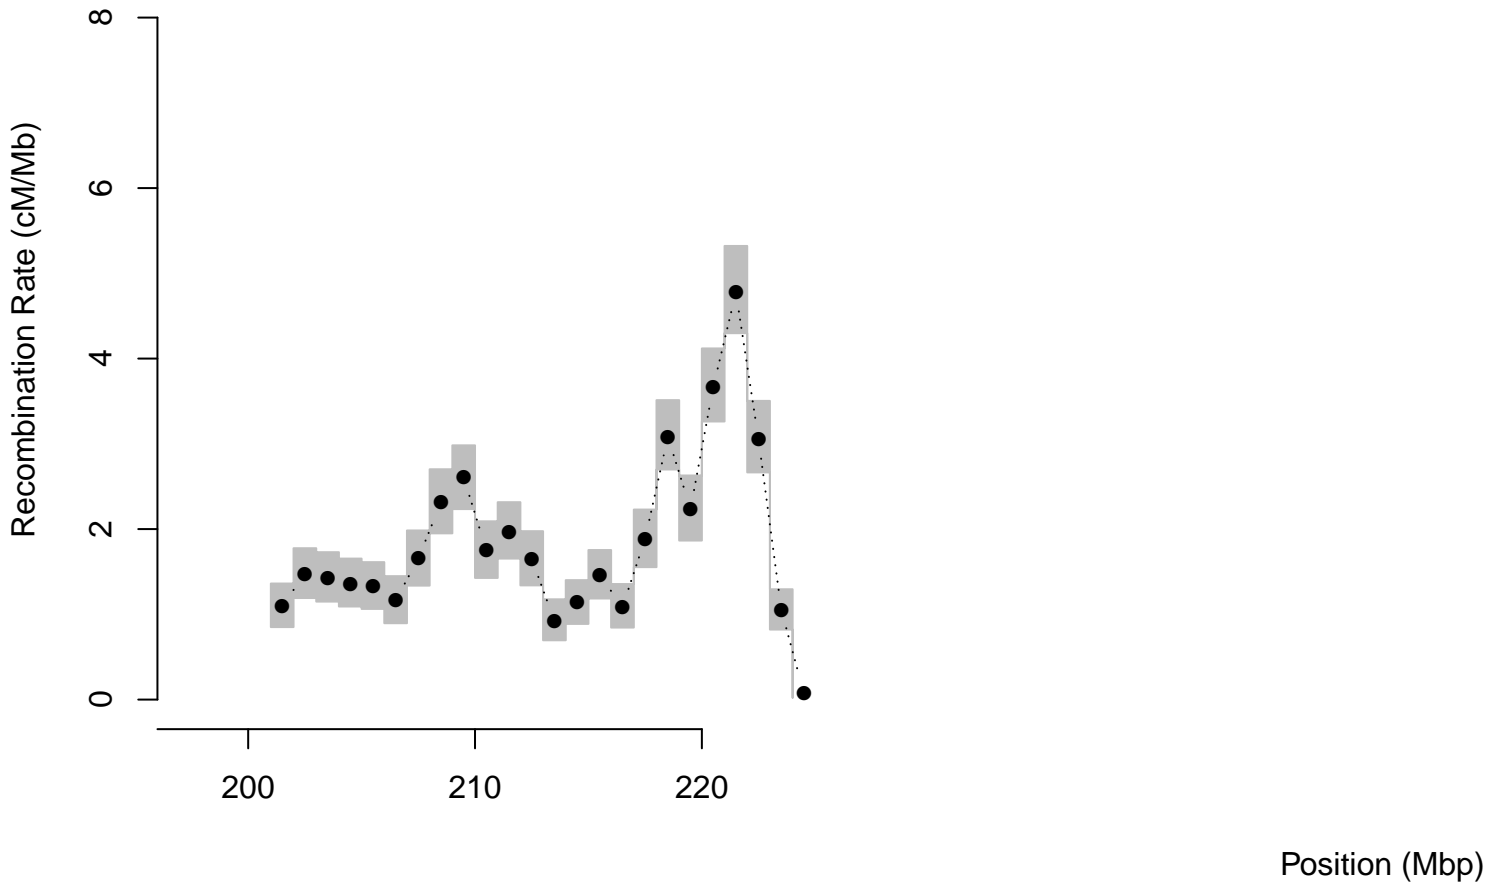

### Chromosome 3 SNP array

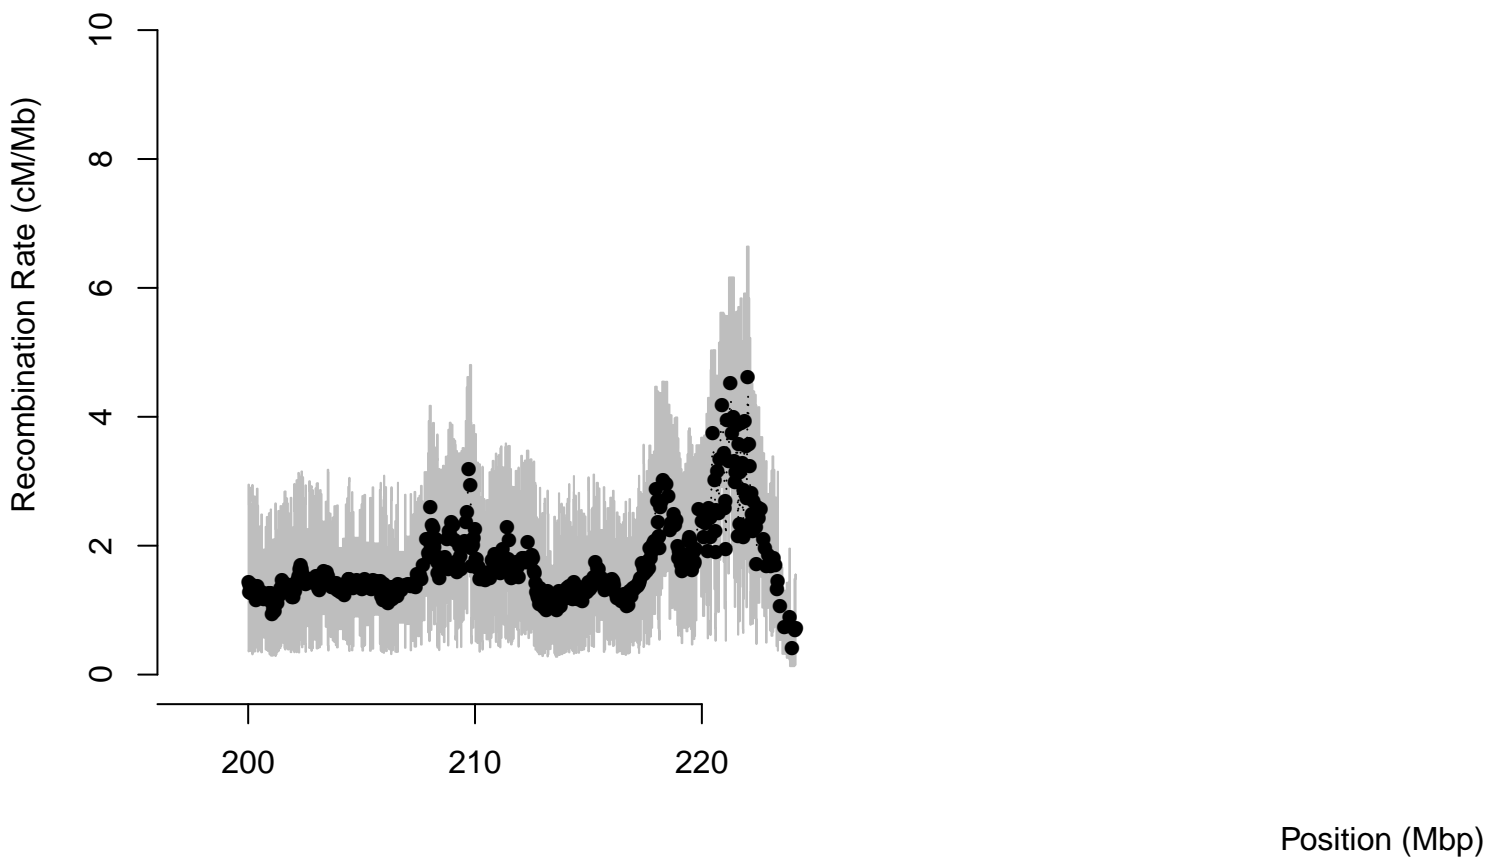

**Chromosome 4 1Mb Windows**

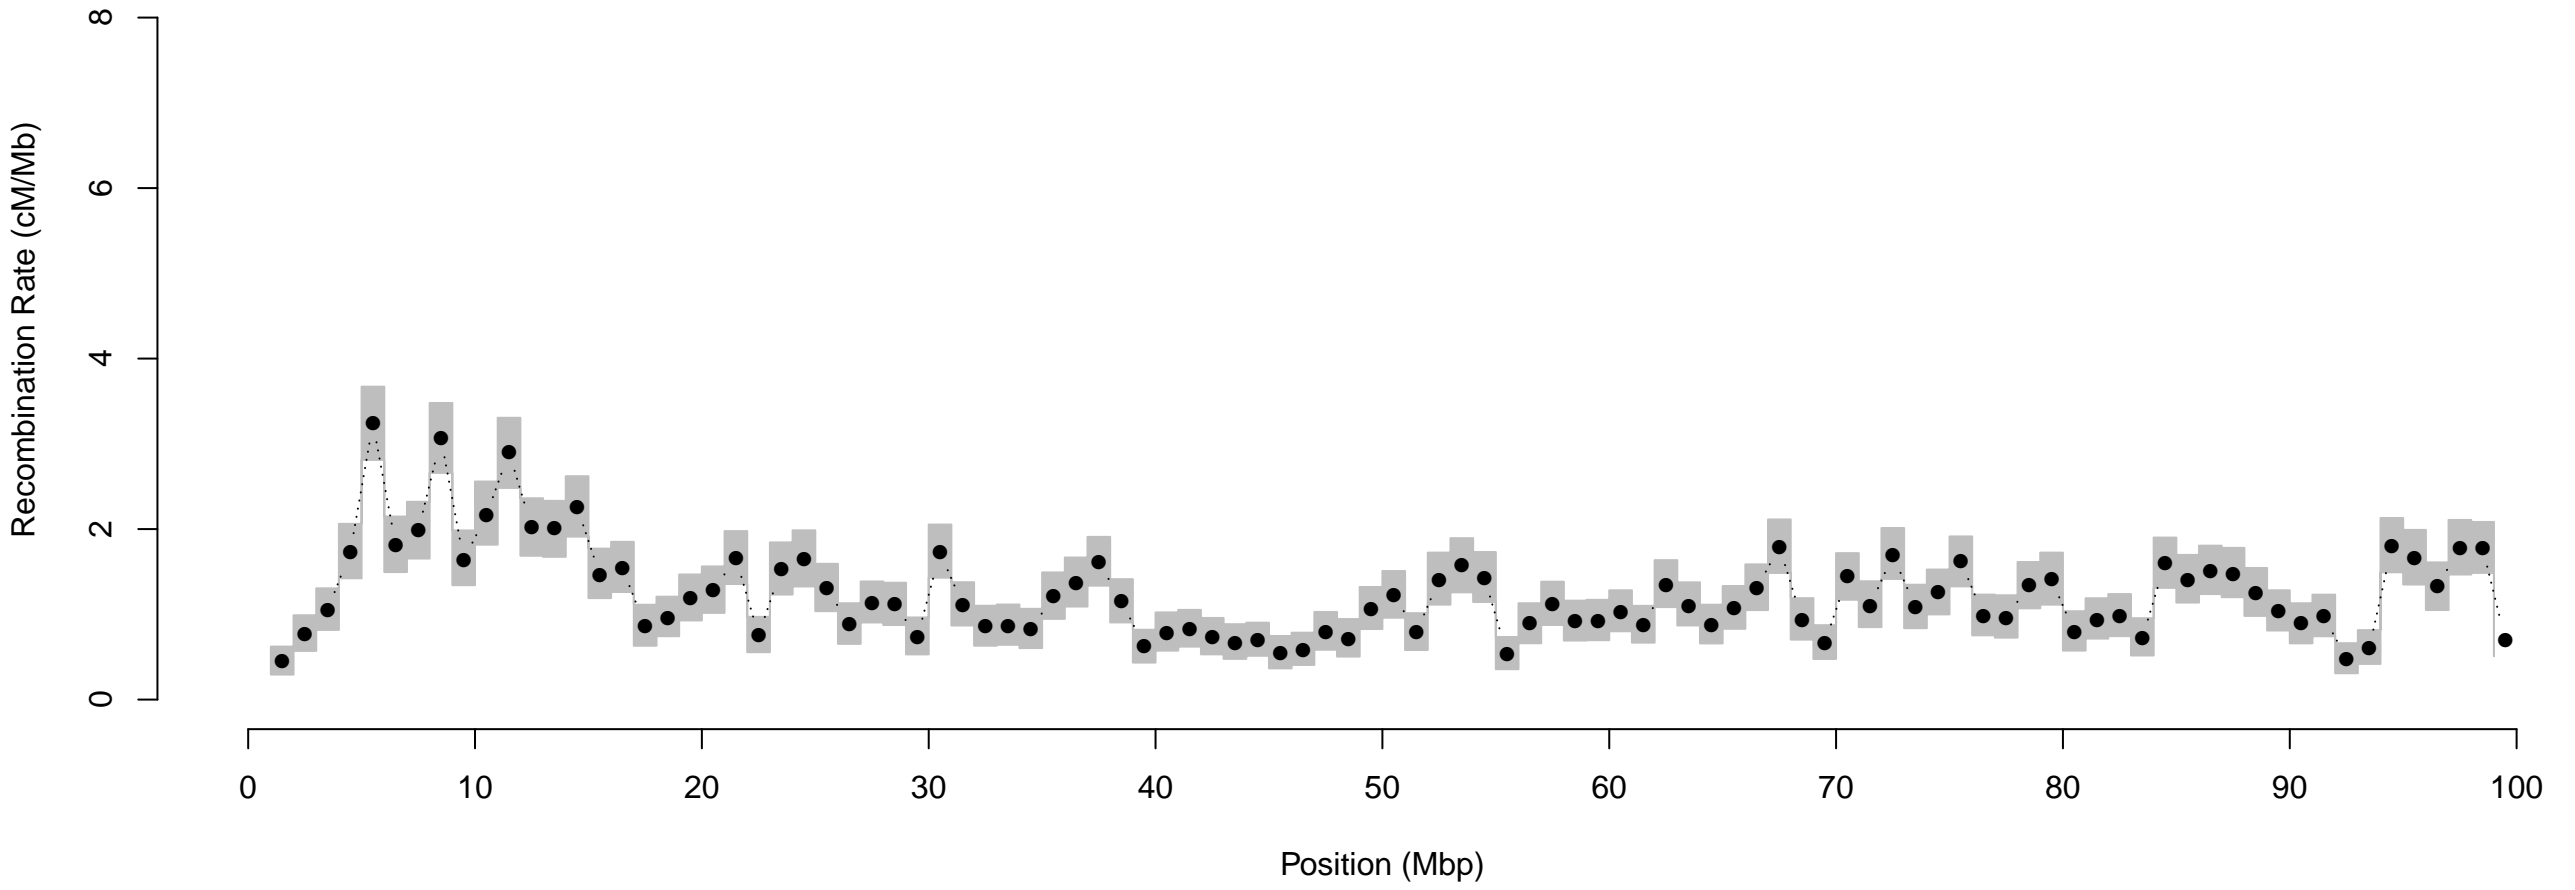

**Chromosome 4 SNP array**

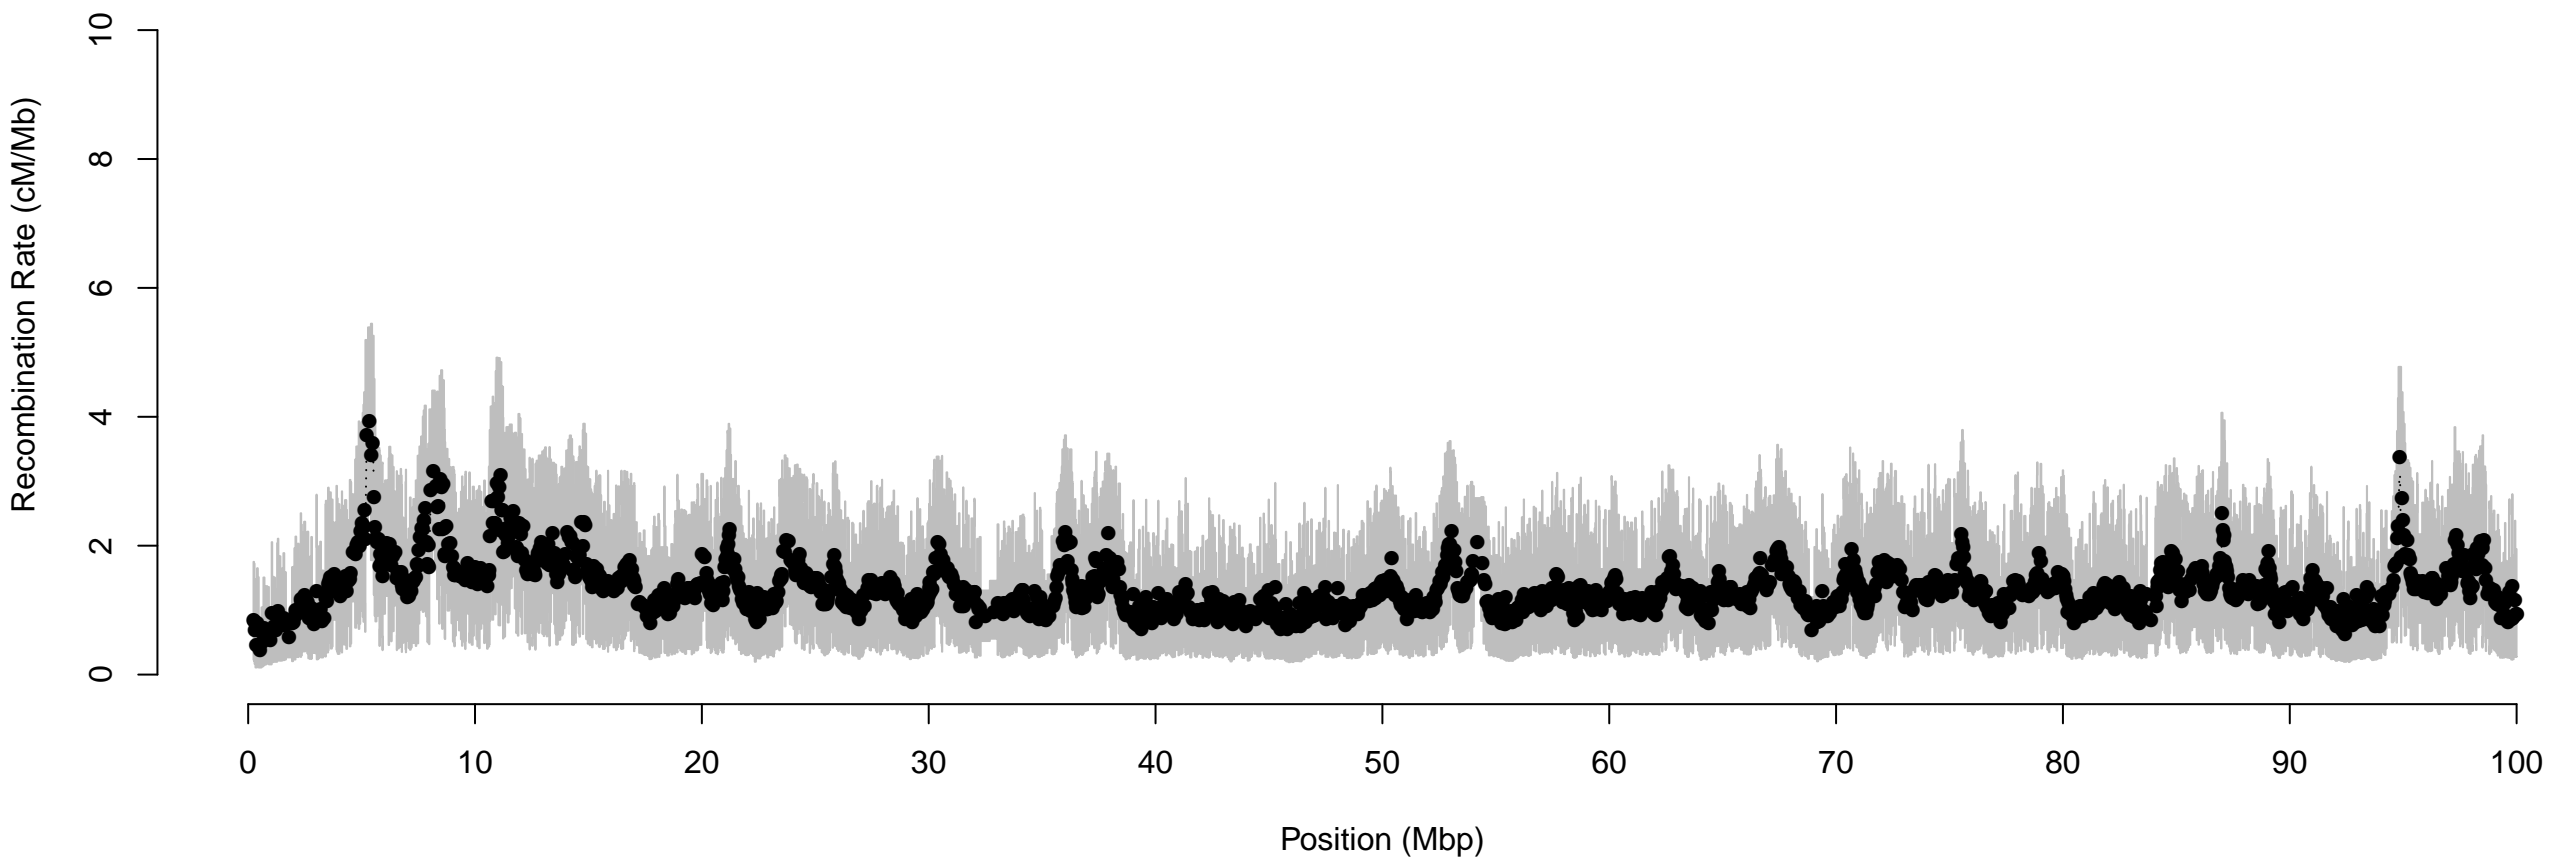

### Chromosome 4 1Mb Windows

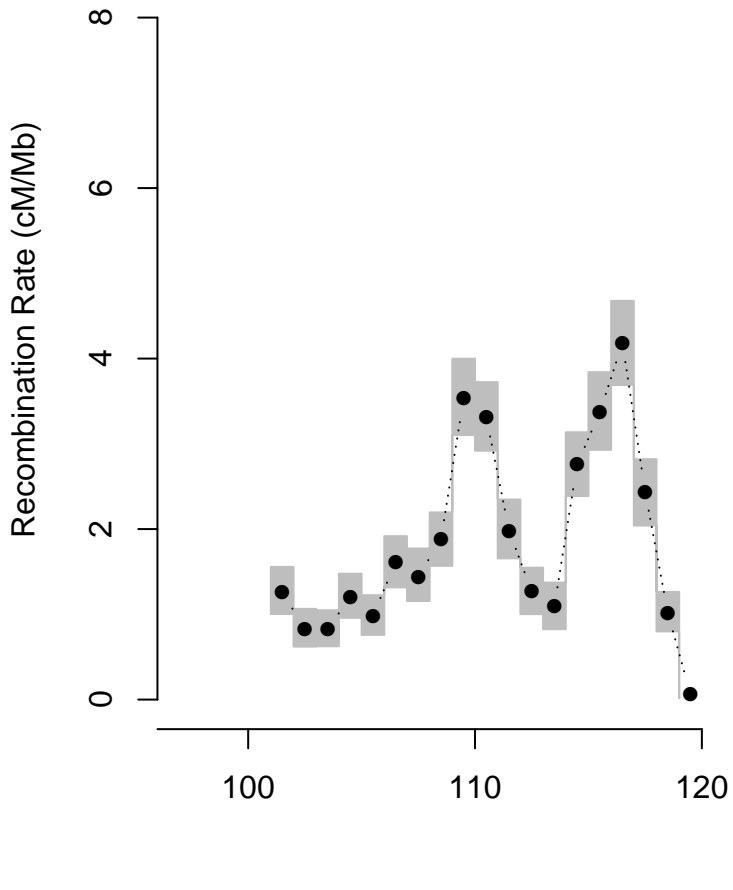

### Chromosome 4 SNP array

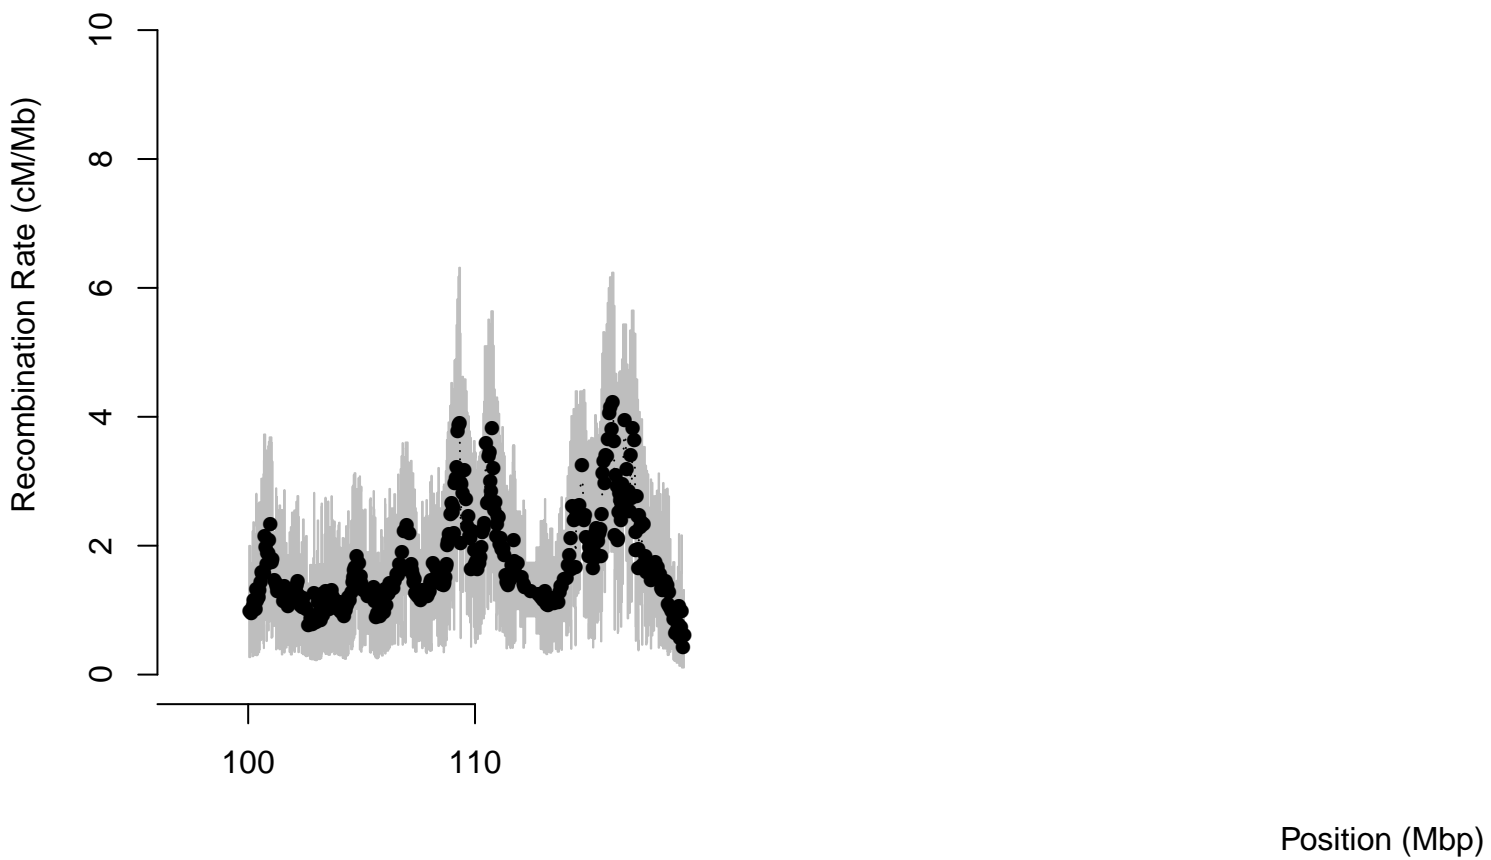

**Chromosome 5 1Mb Windows**

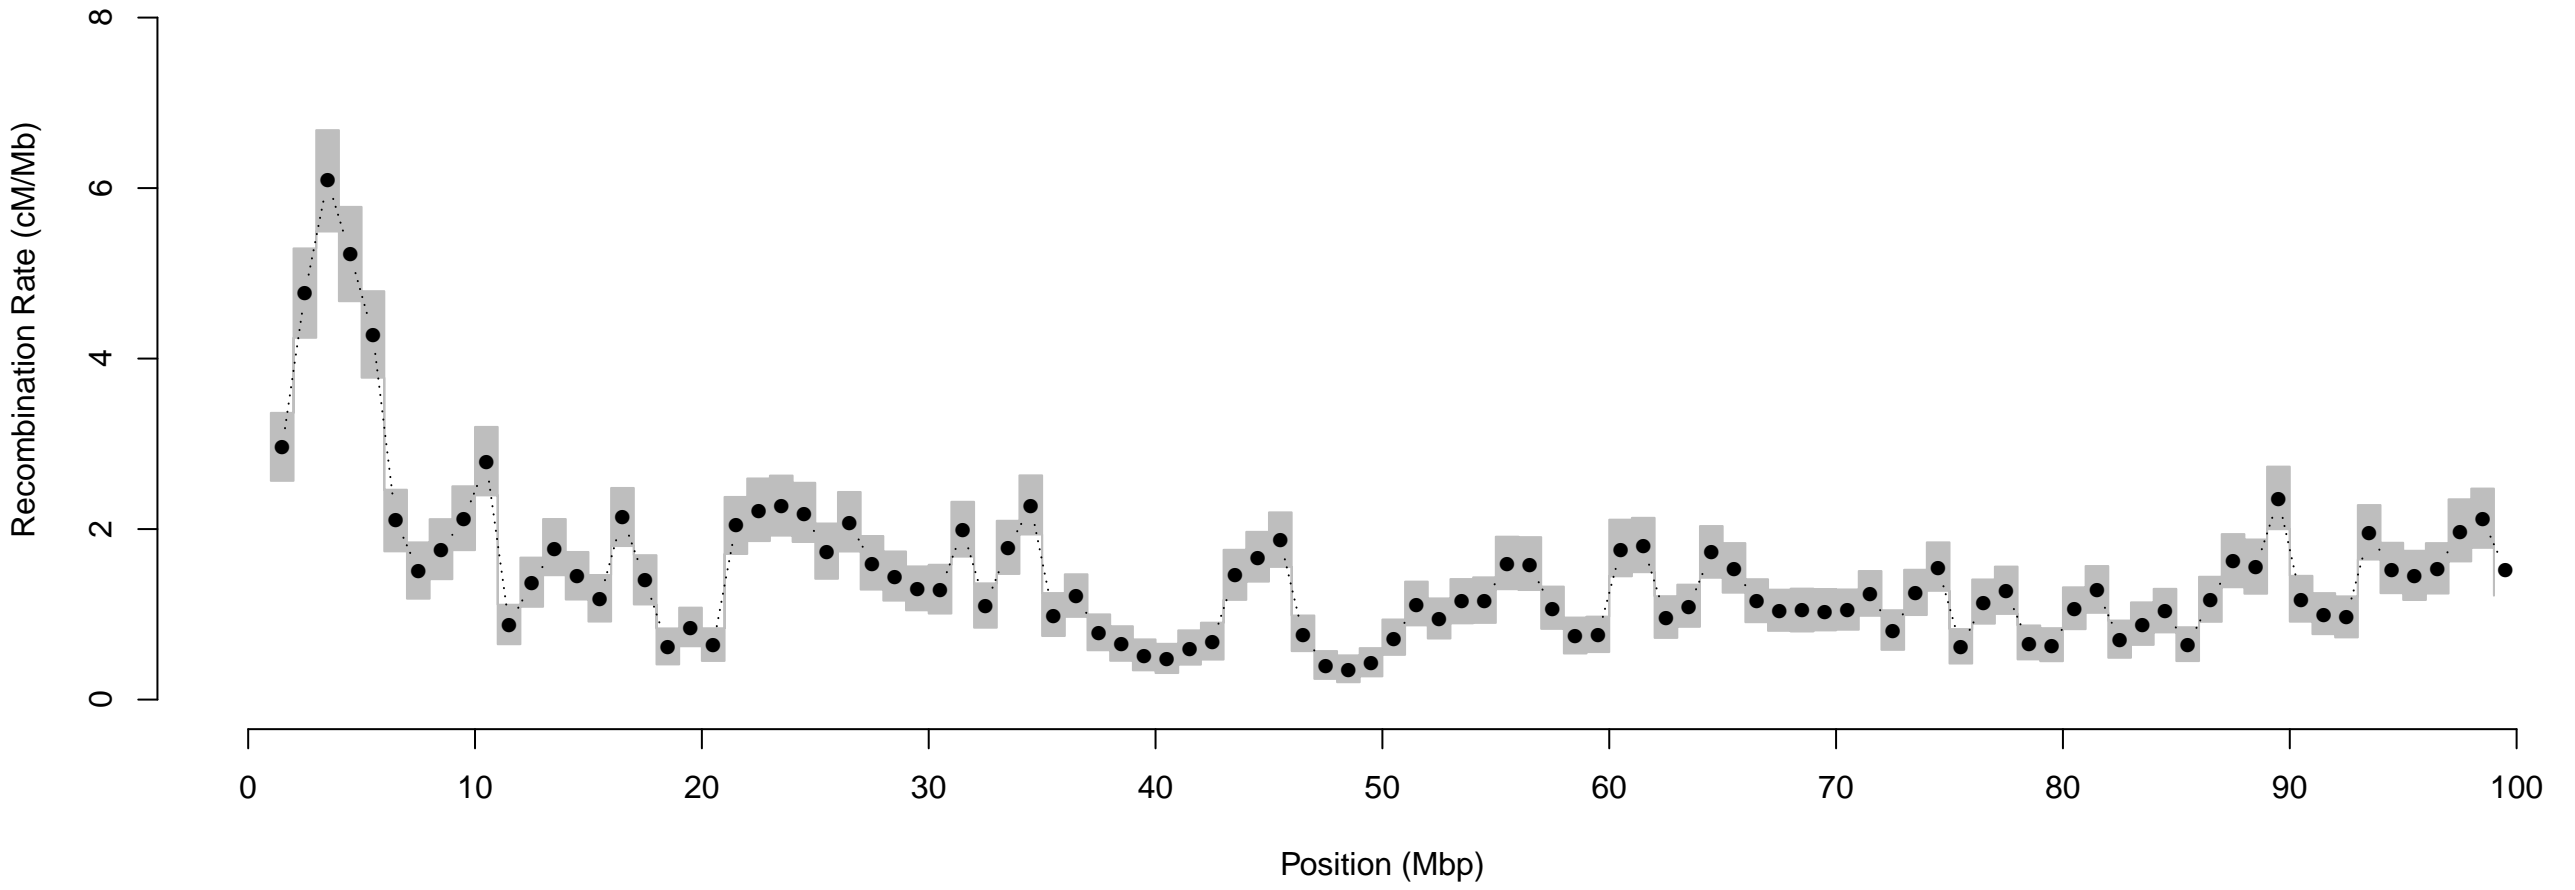

**Chromosome 5 SNP array**

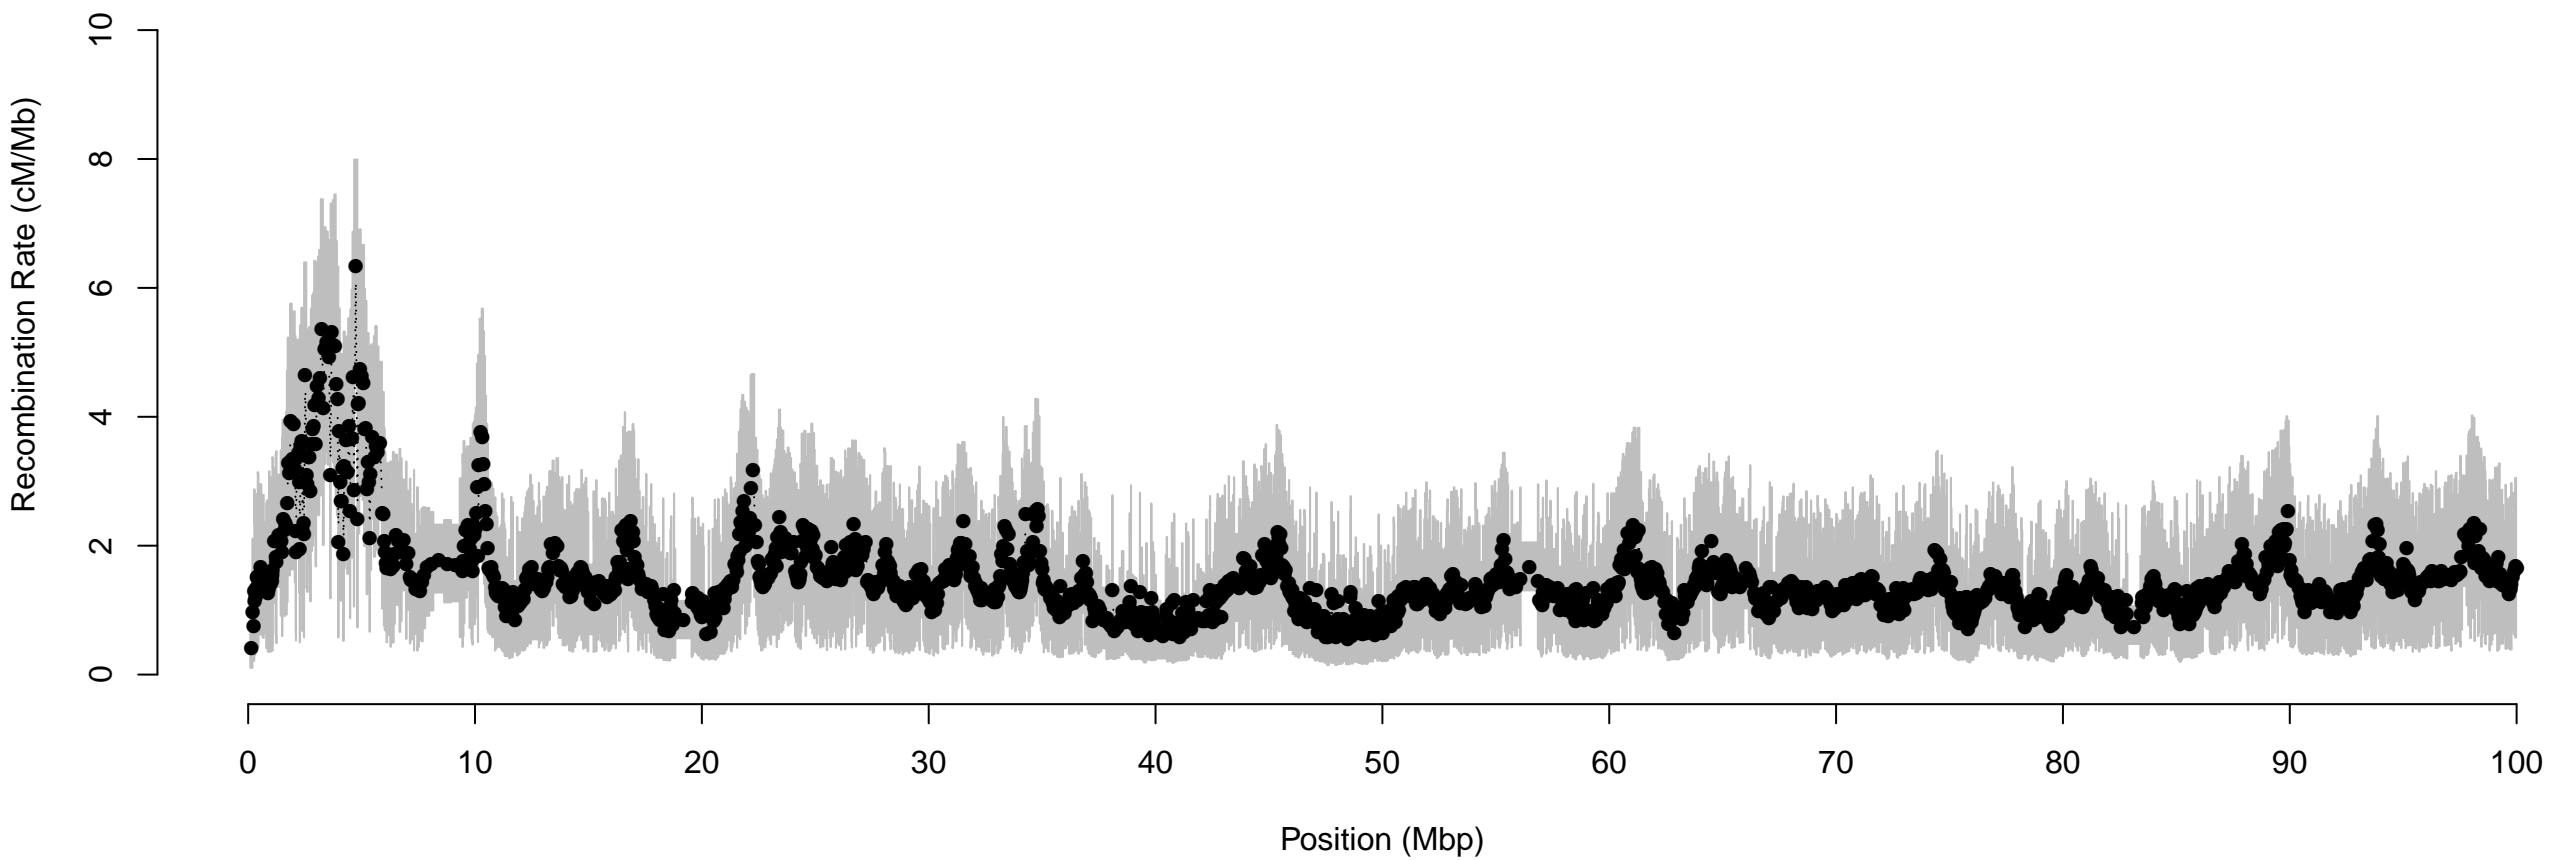

### Chromosome 5 1Mb Windows

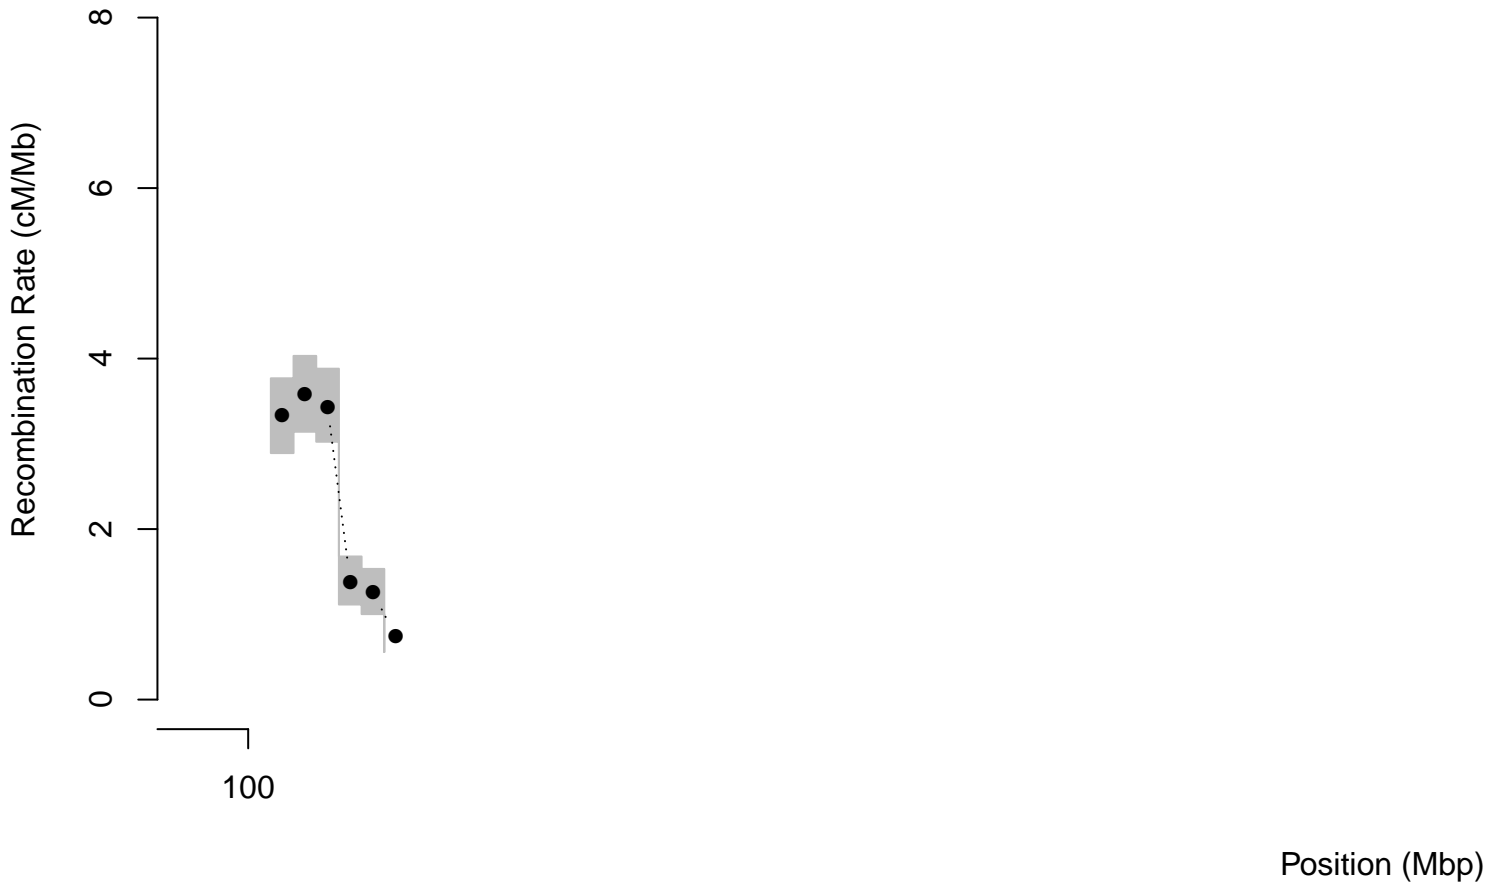

### Chromosome 5 SNP array

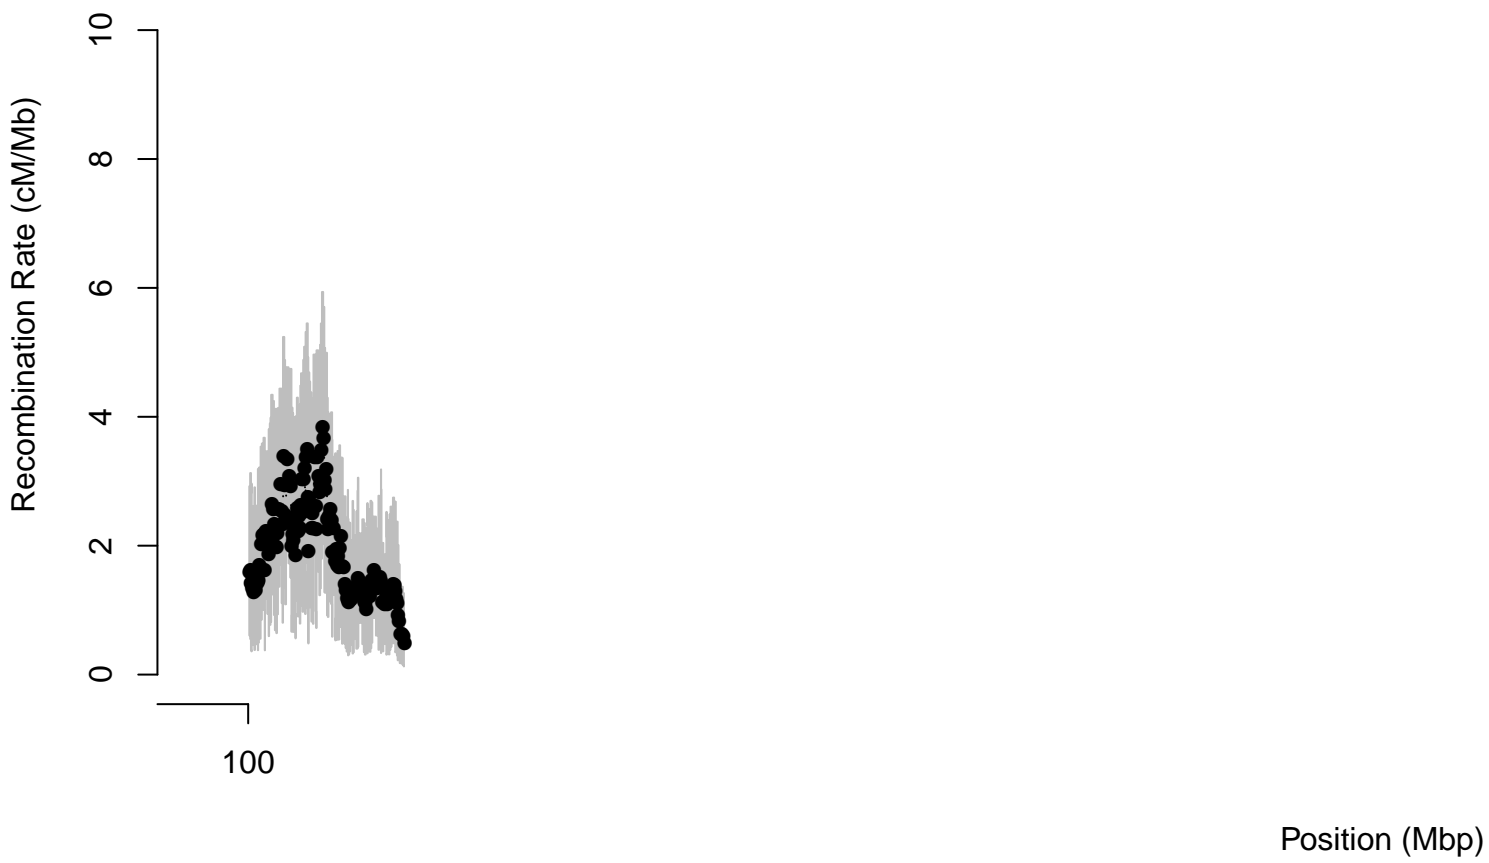

**Chromosome 6 1Mb Windows**

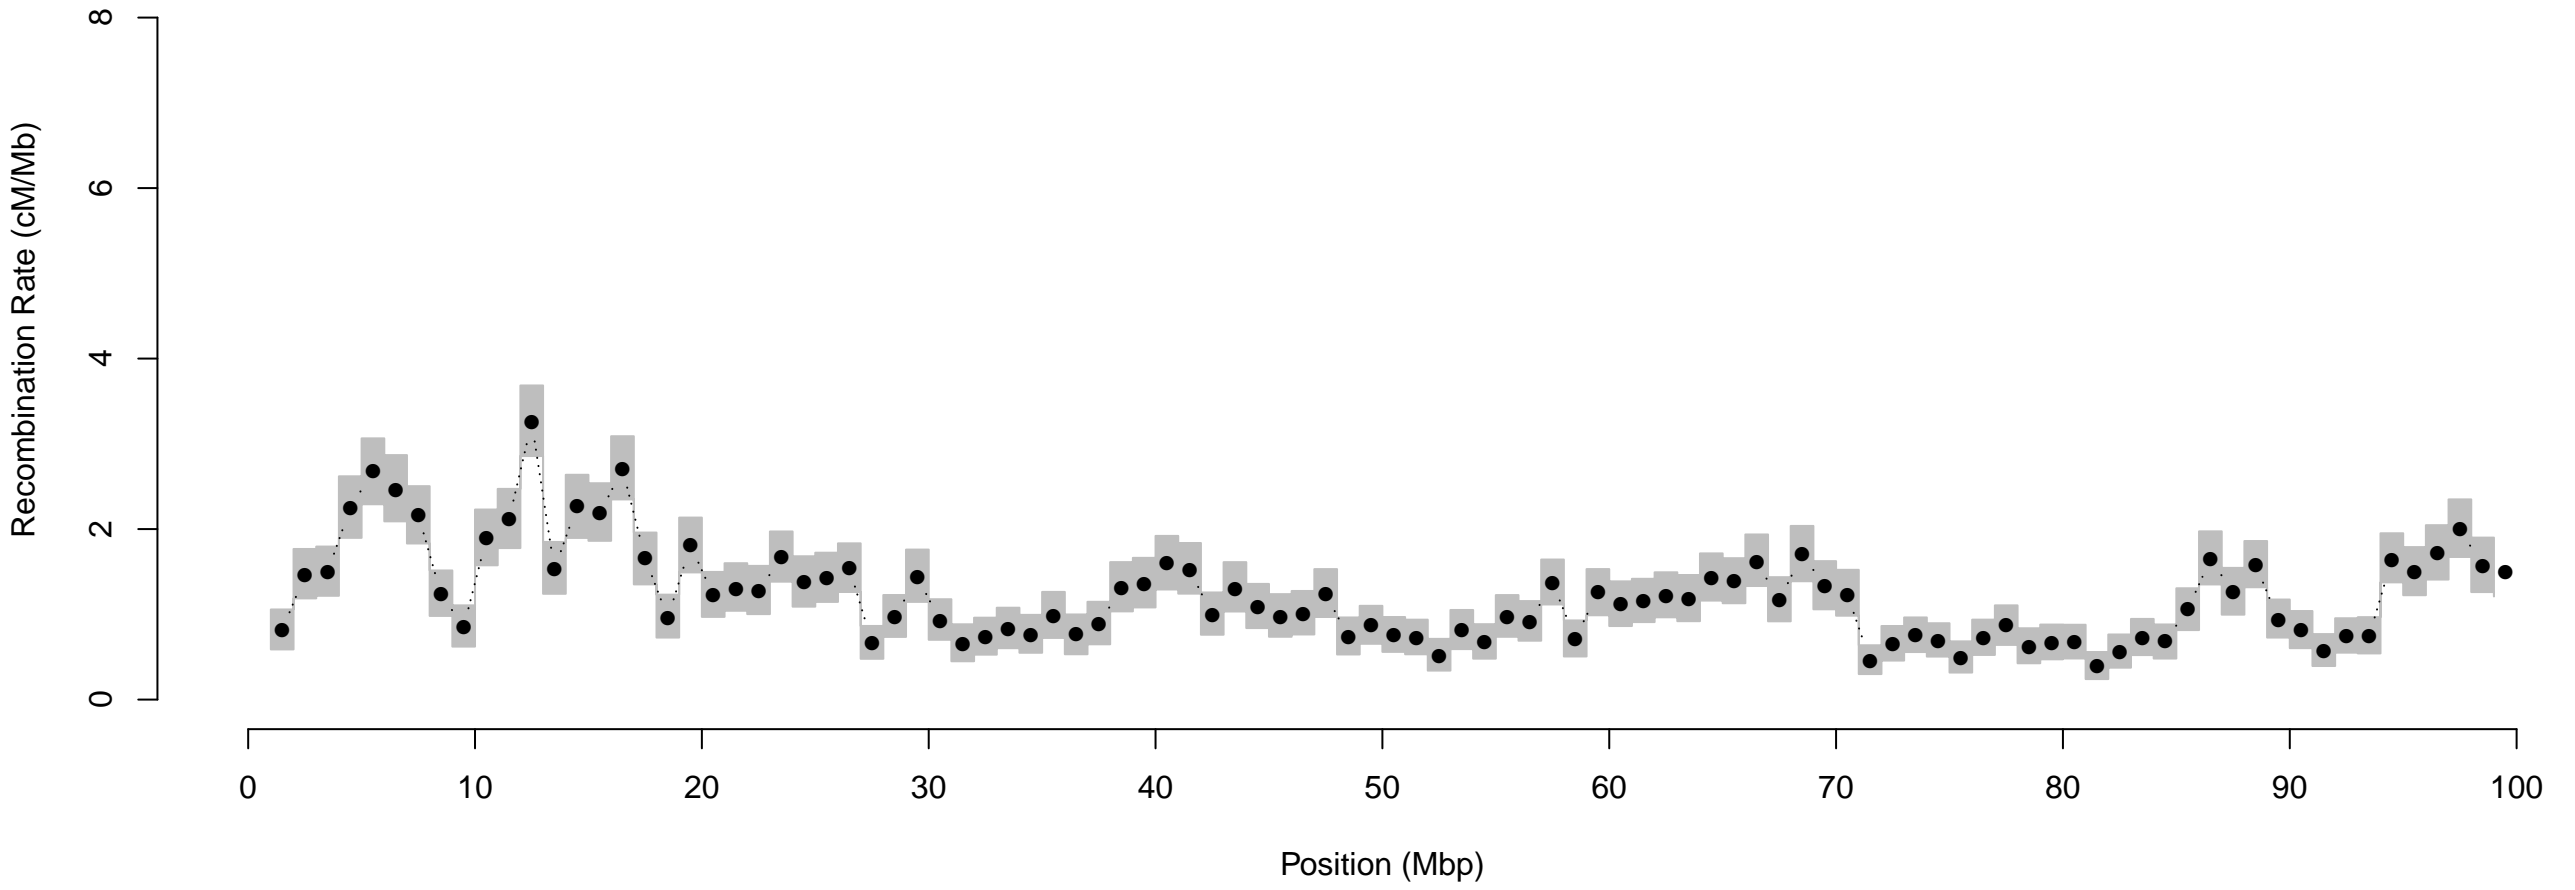

**Chromosome 6 SNP array**

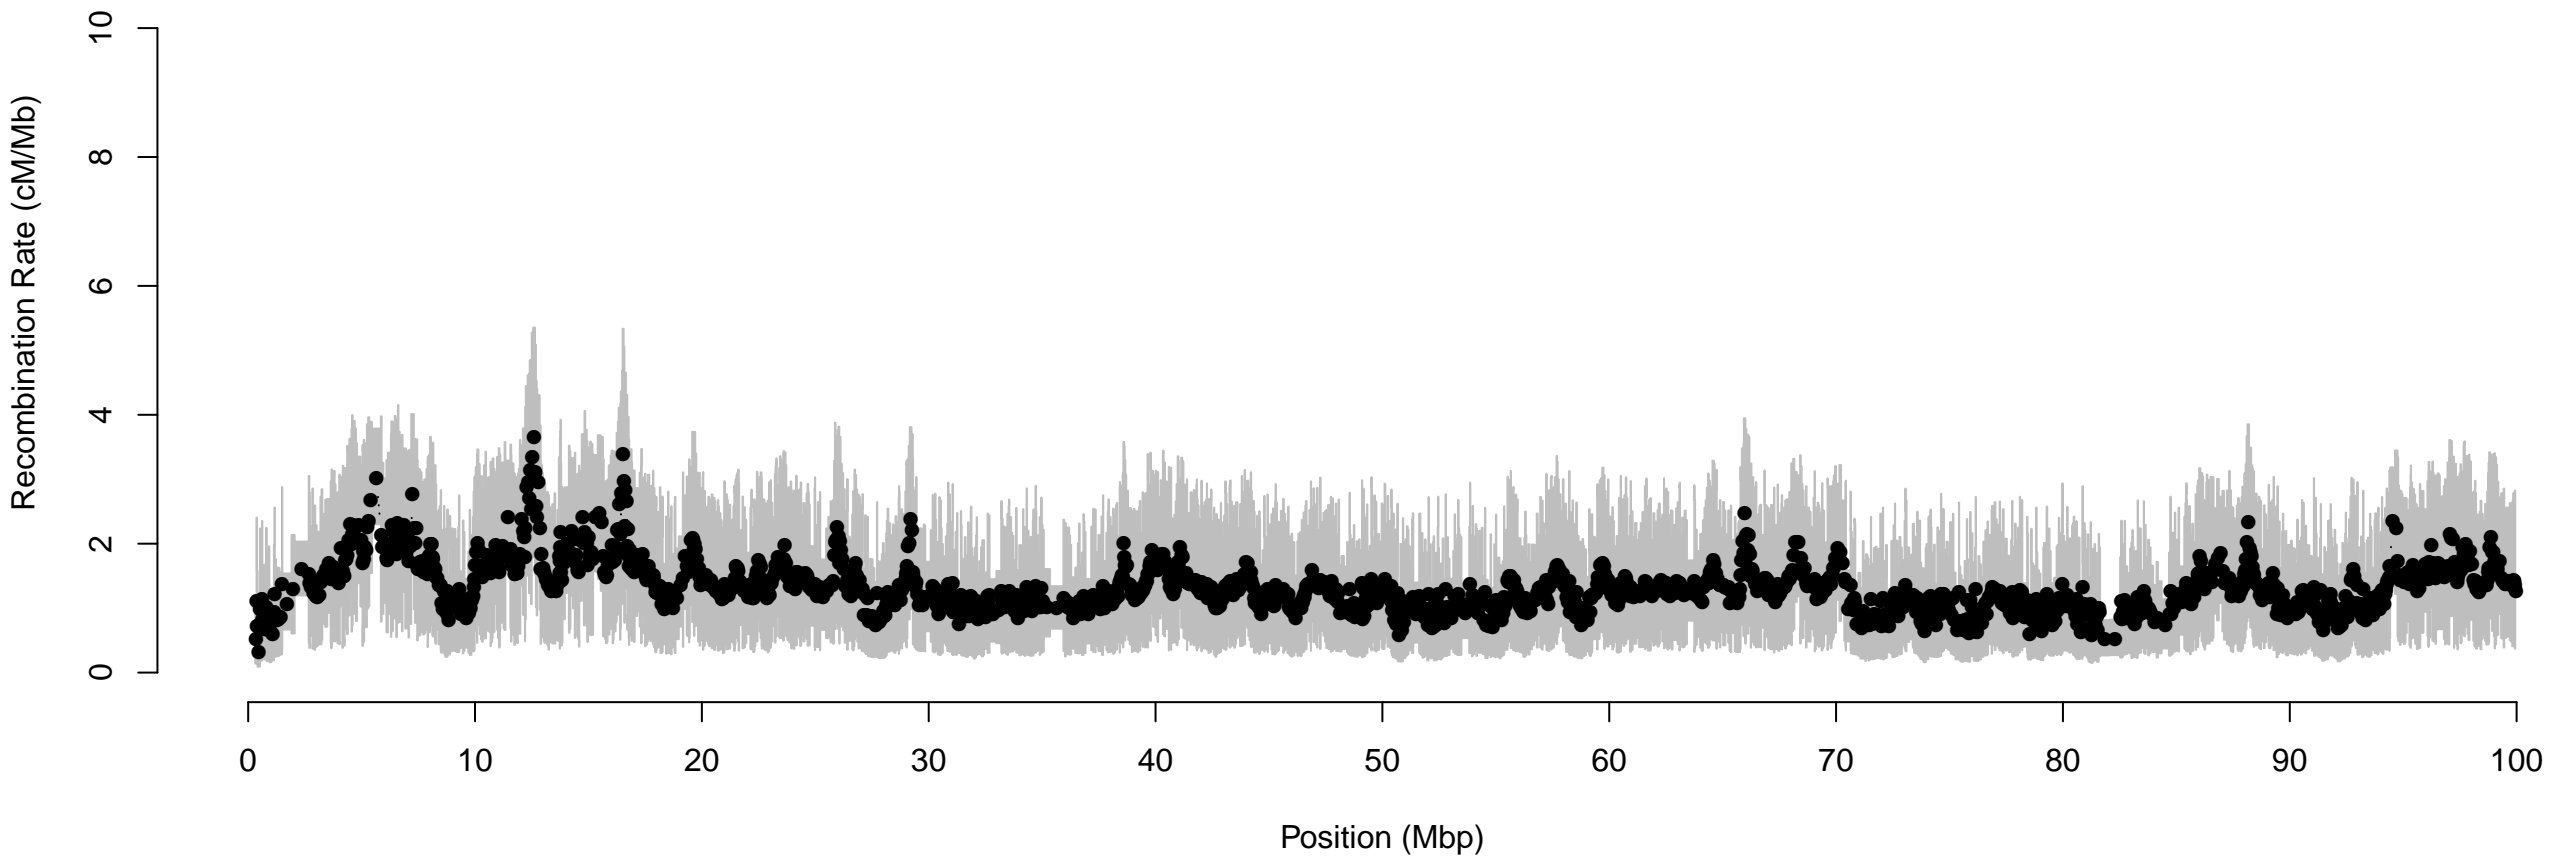

### Chromosome 6 1Mb Windows

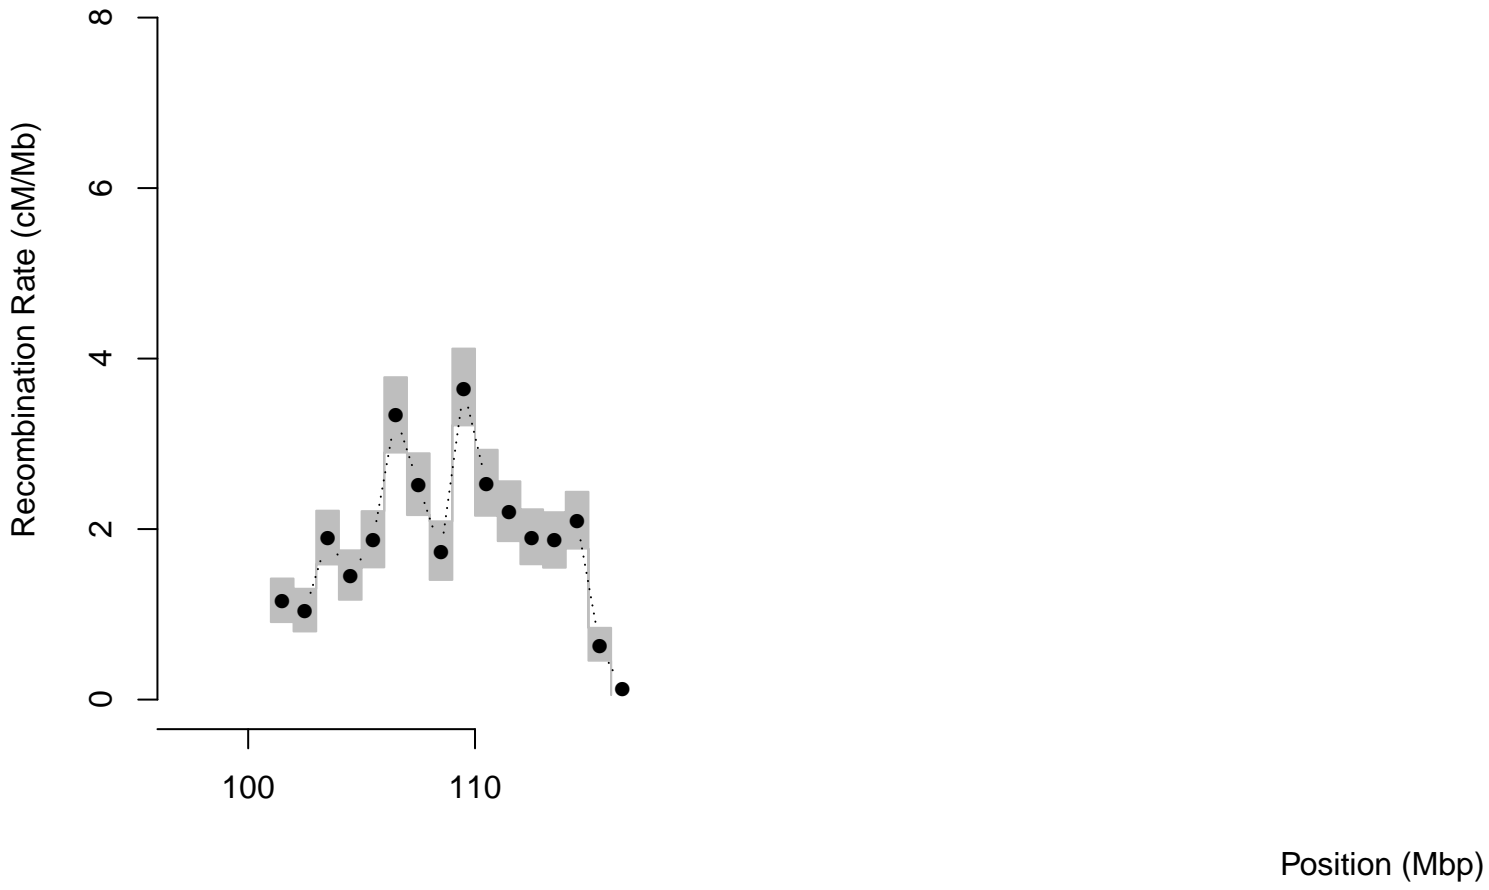

### Chromosome 6 SNP array

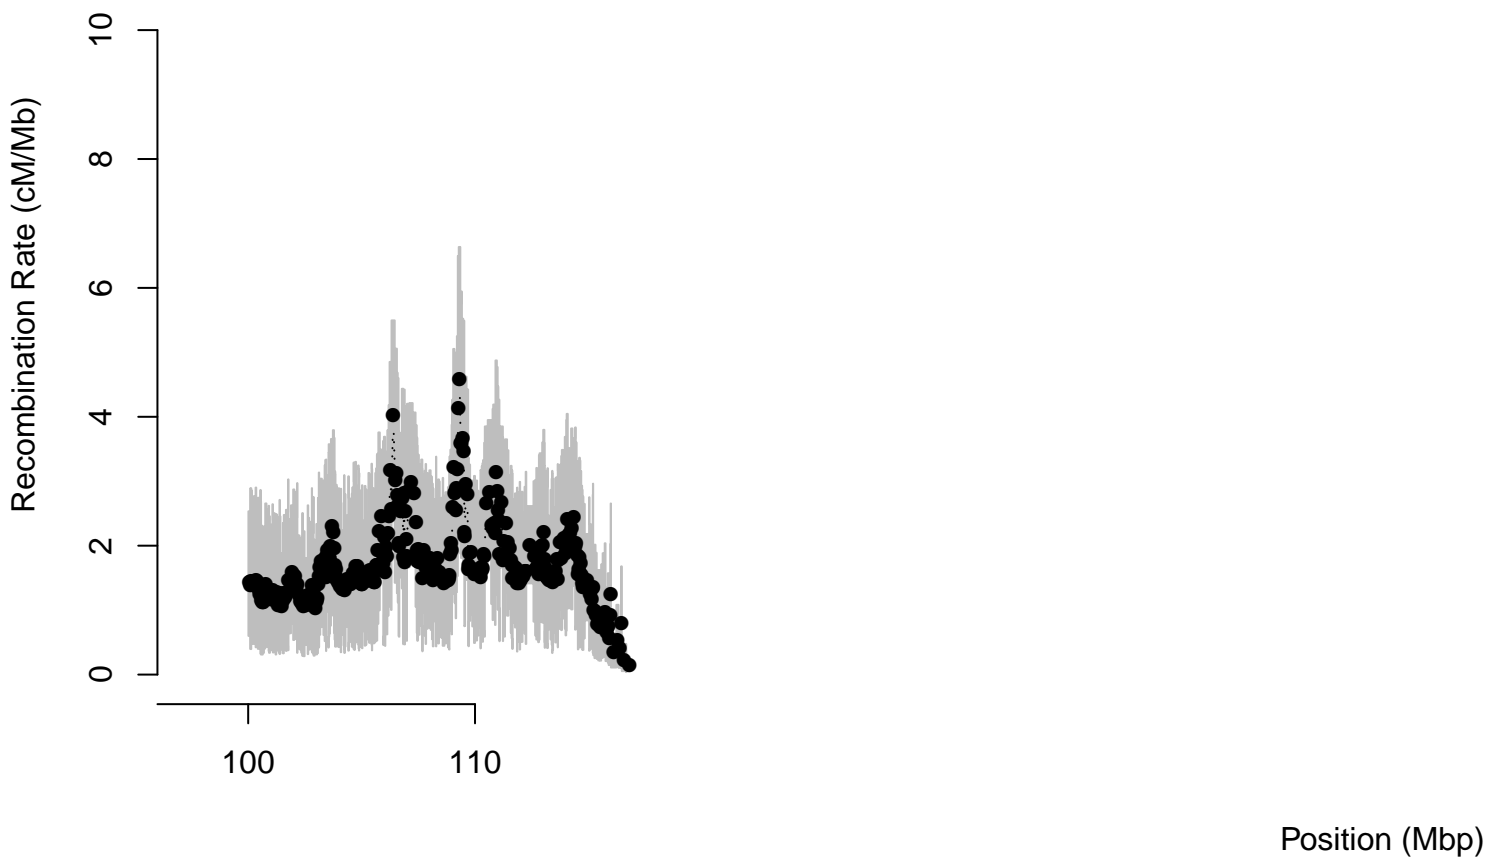

**Chromosome 7 1Mb Windows**

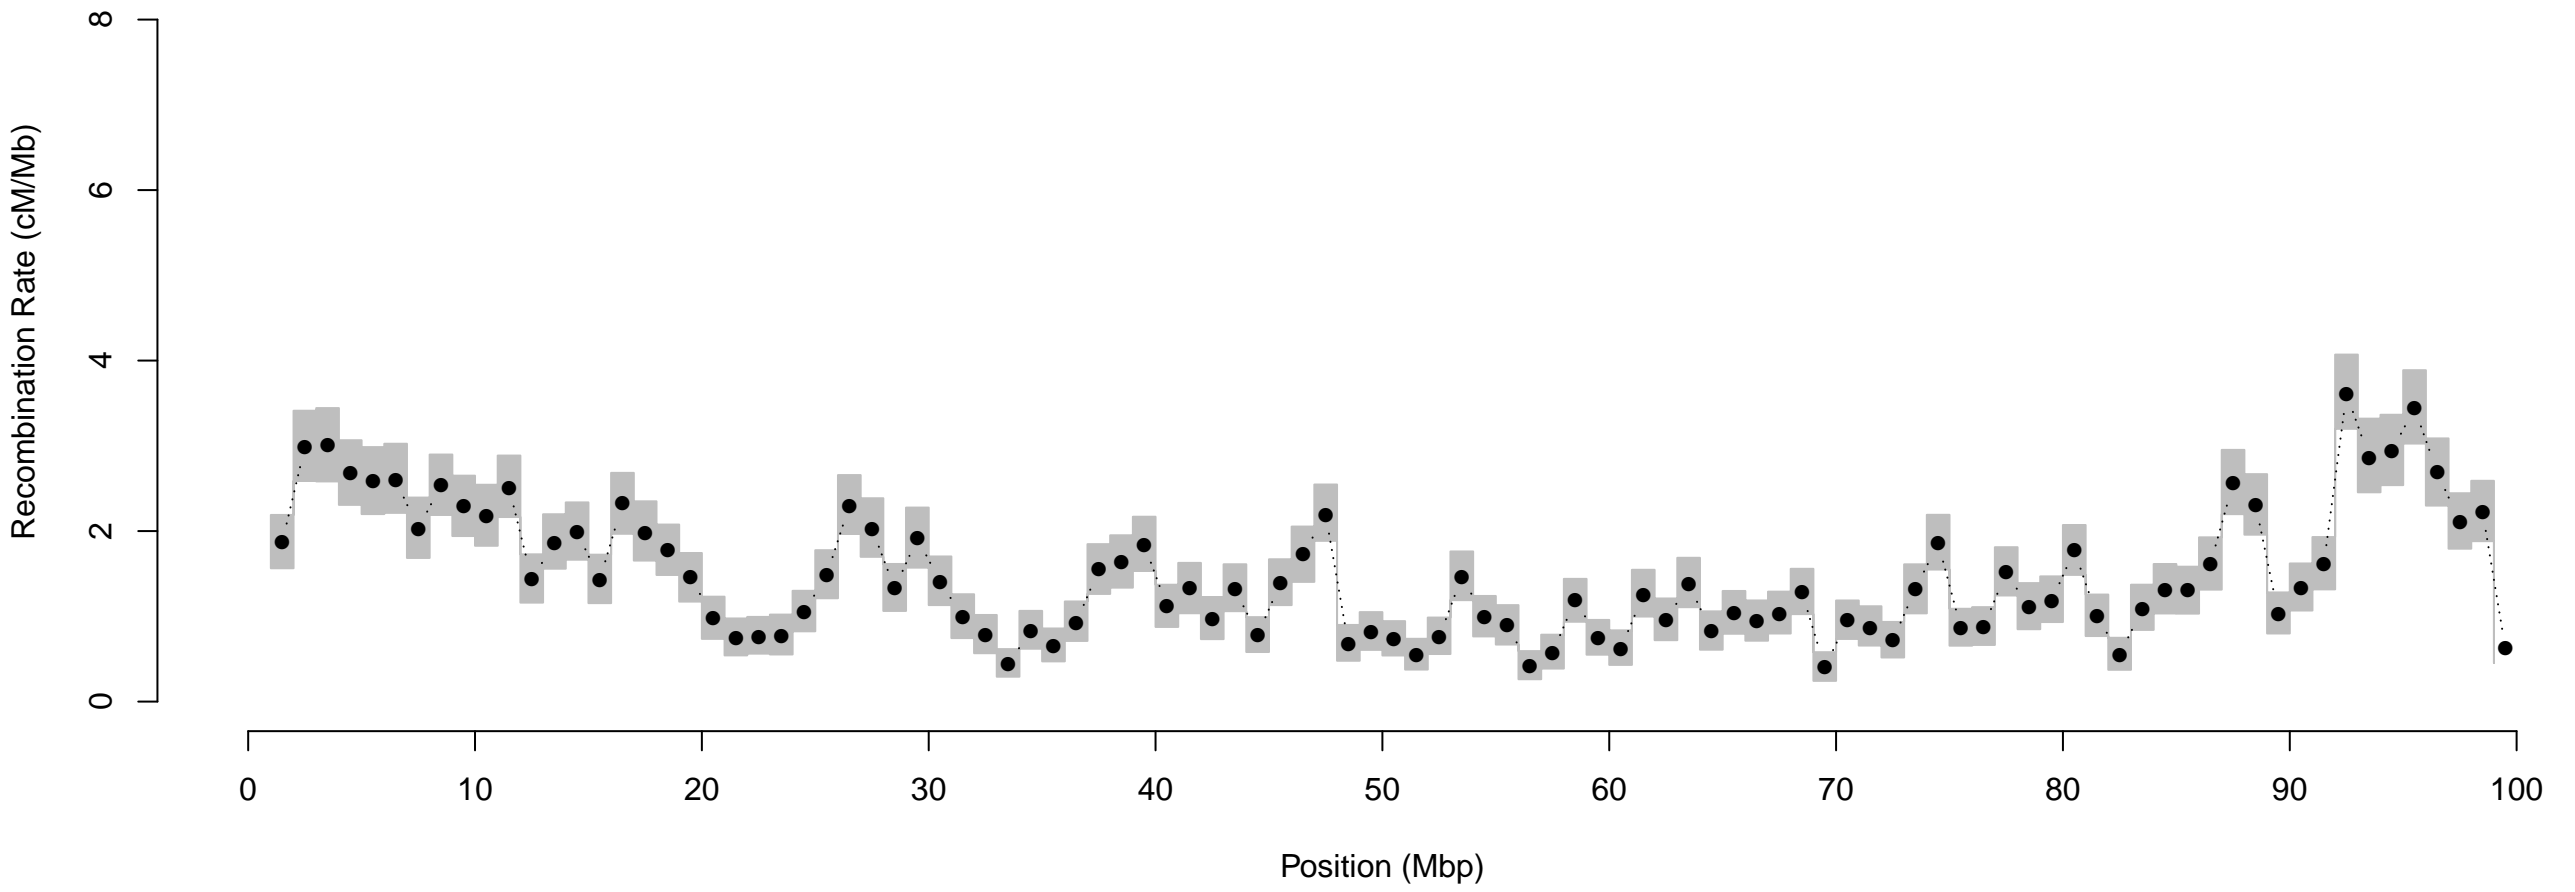

**Chromosome 7 SNP array**

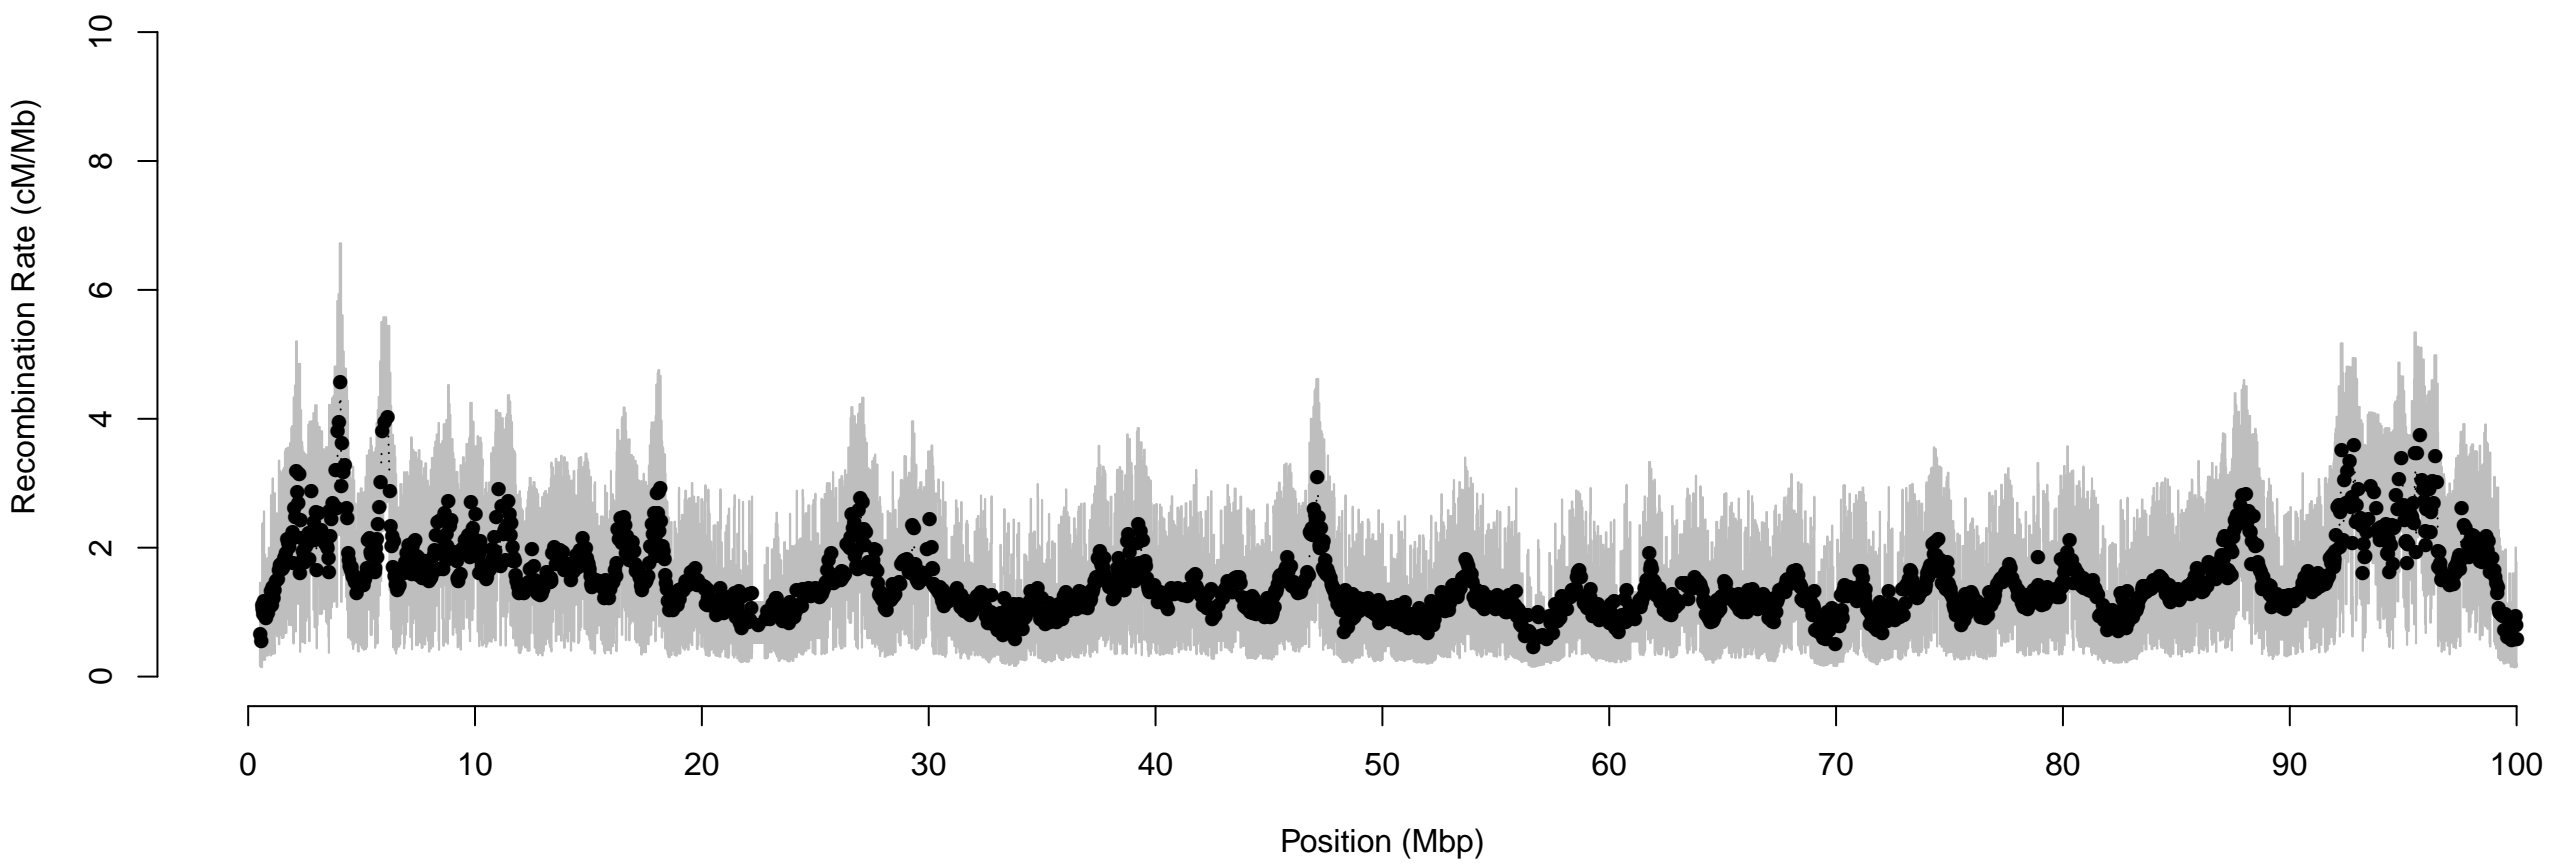



Chromosome 8 1Mb Windows

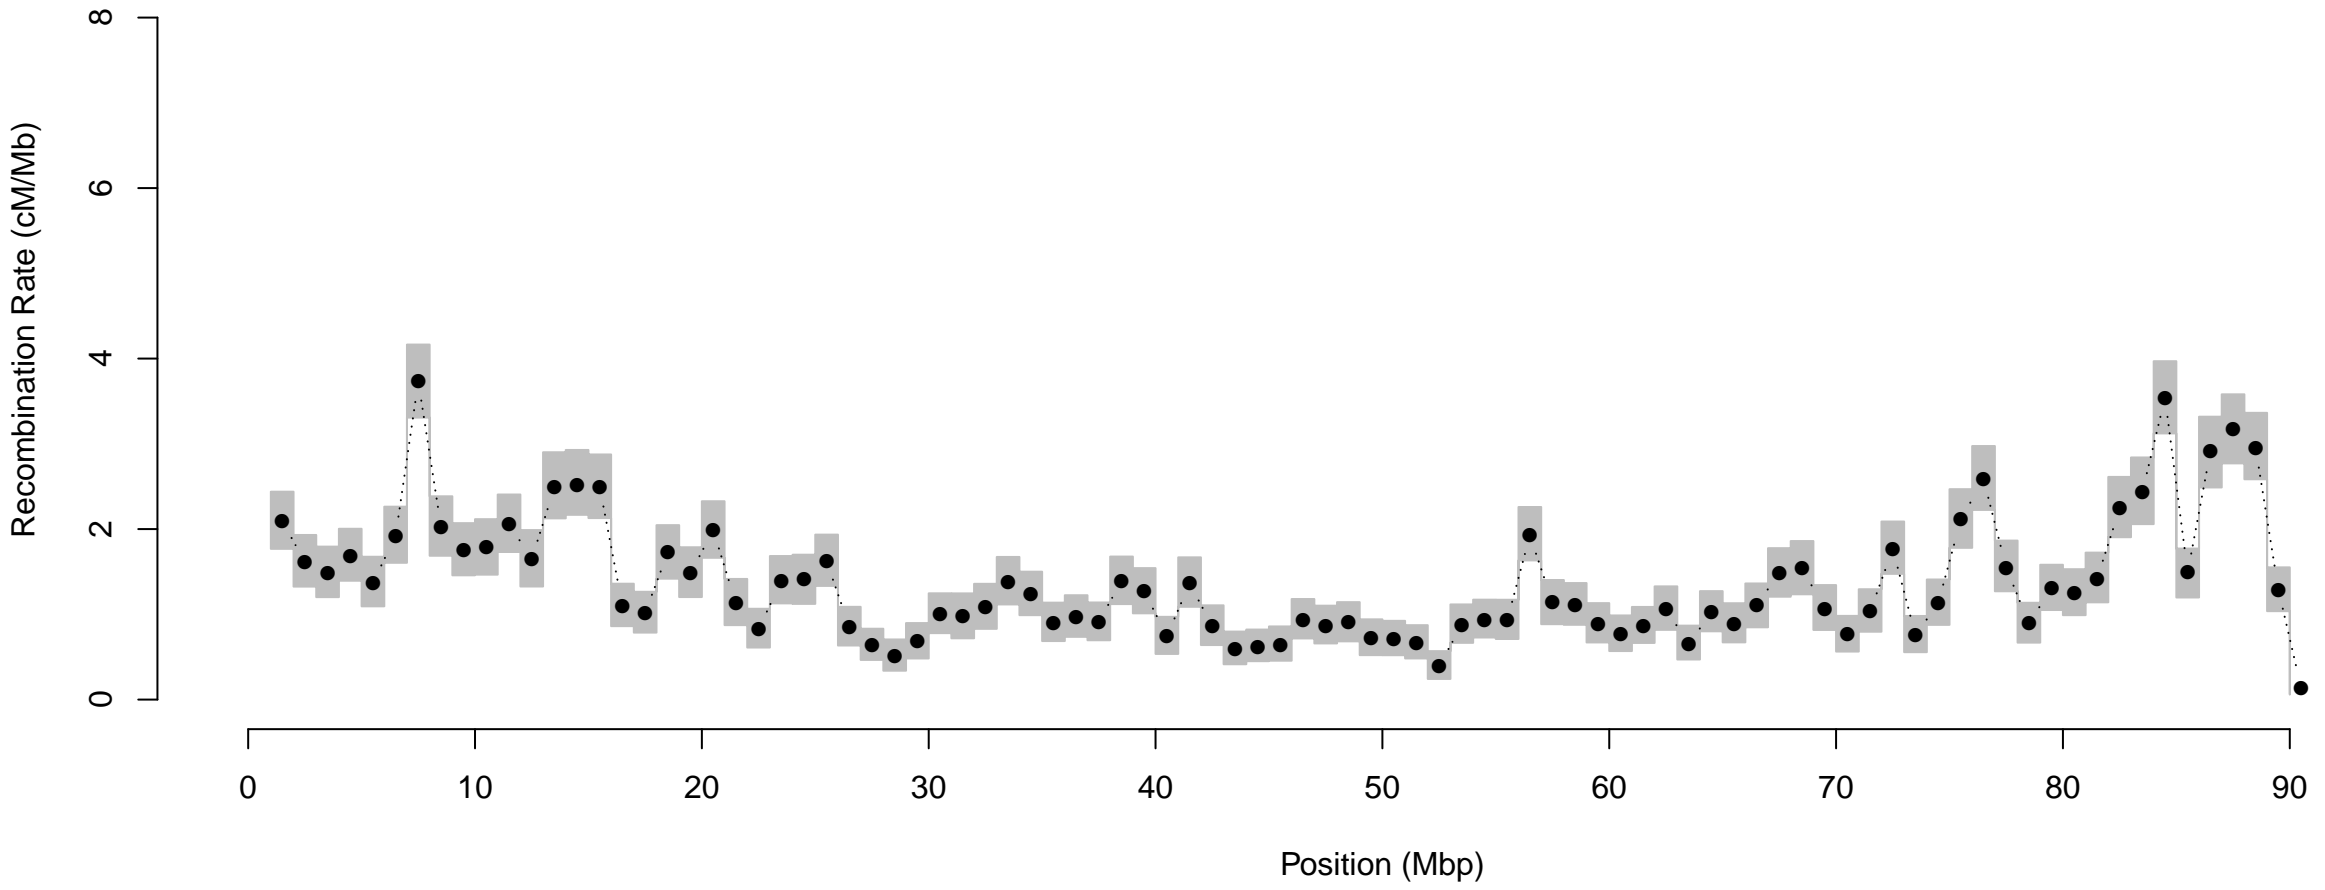

Chromosome 8 SNP array

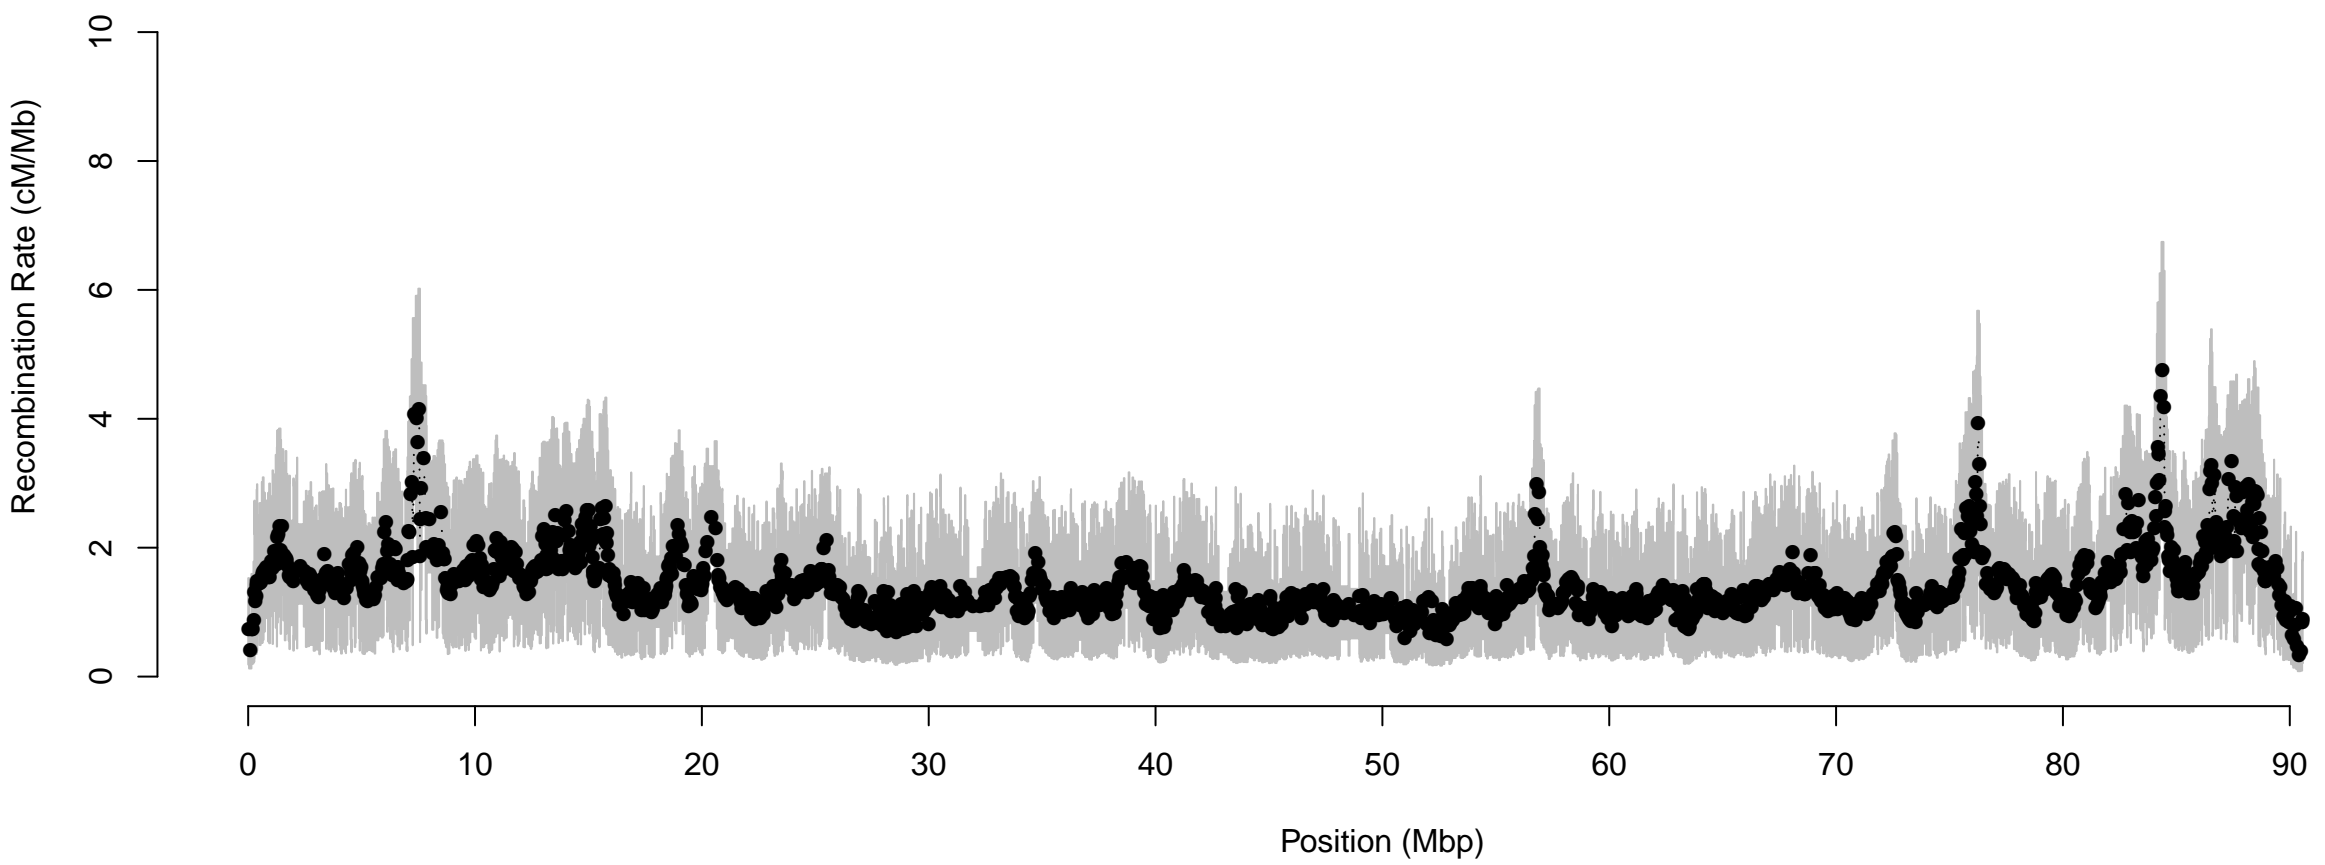

Chromosome 9 1Mb Windows

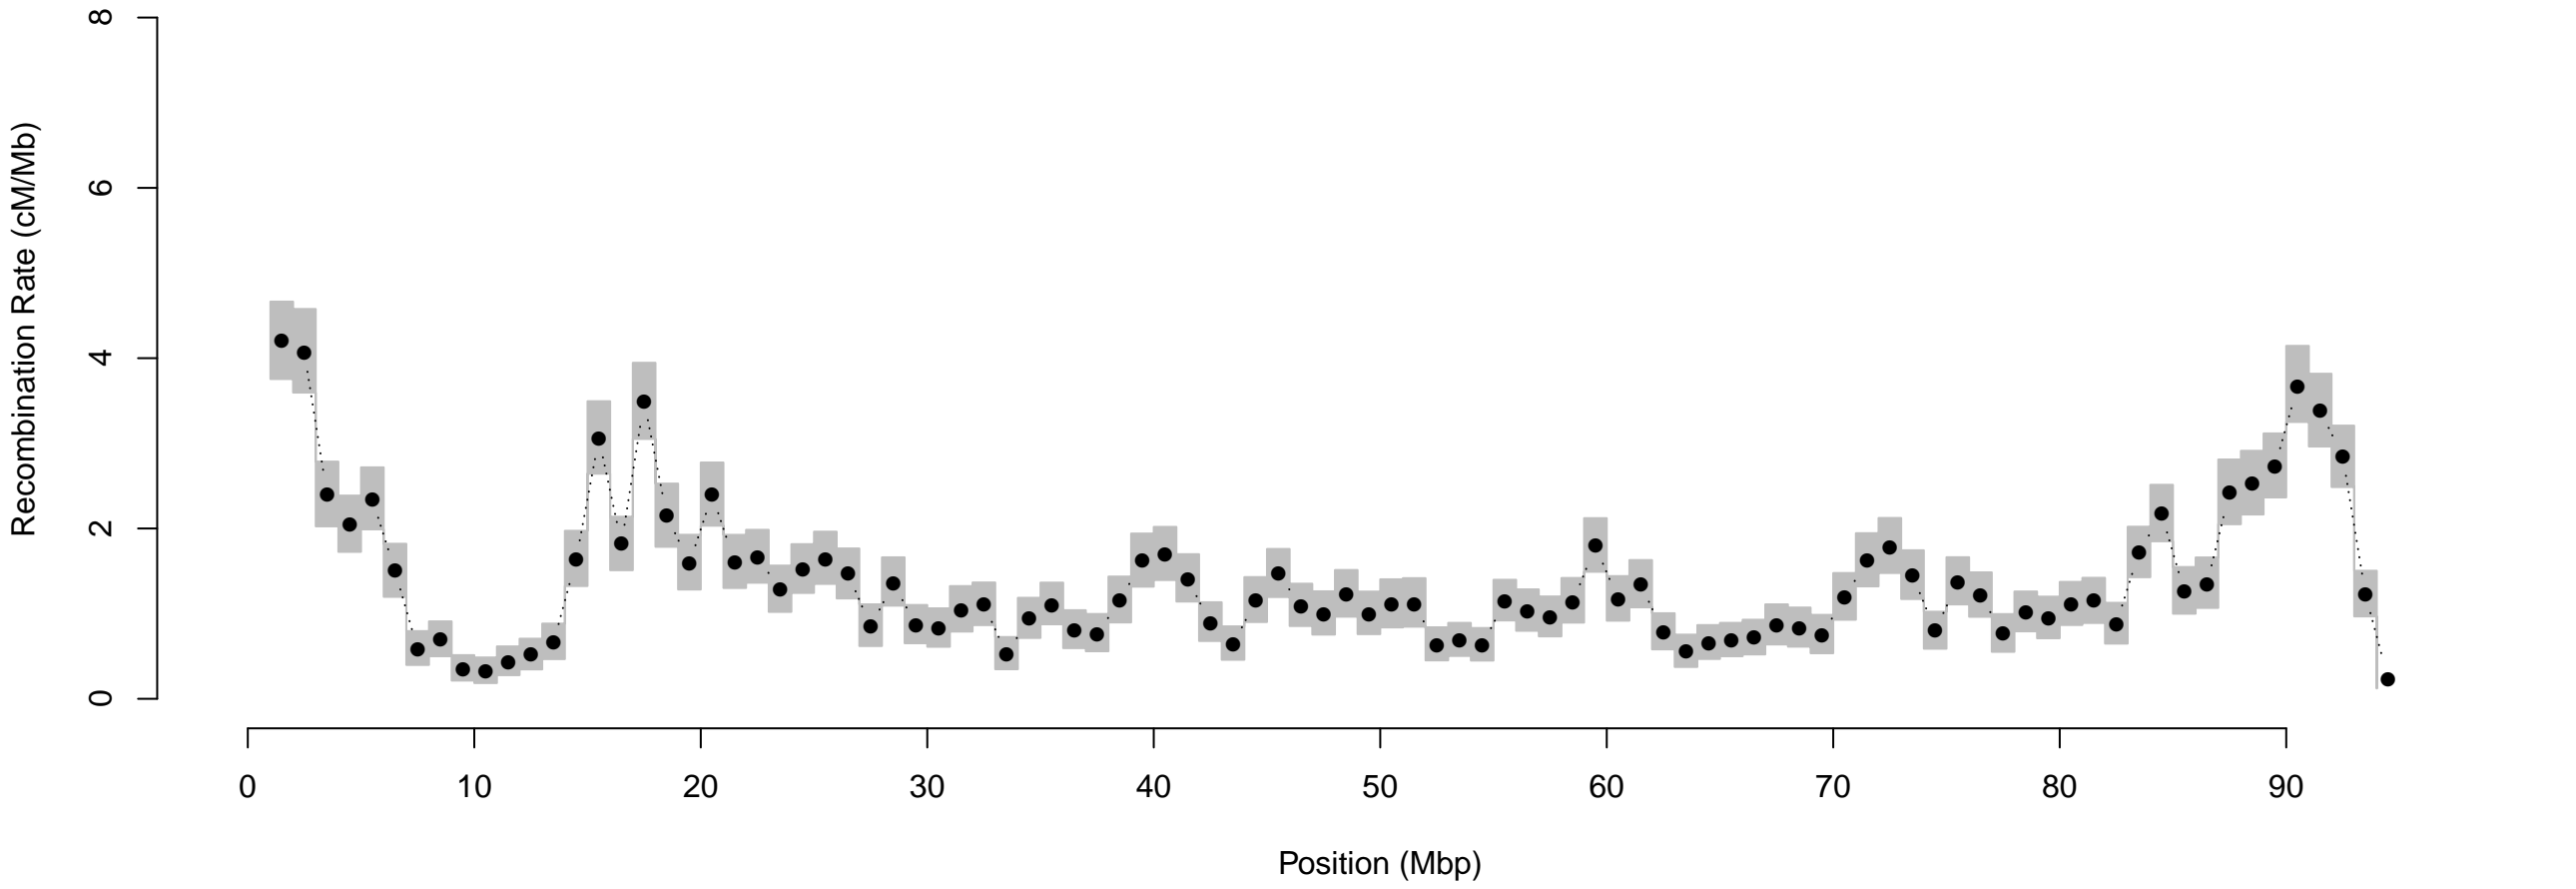

Chromosome 9 SNP array

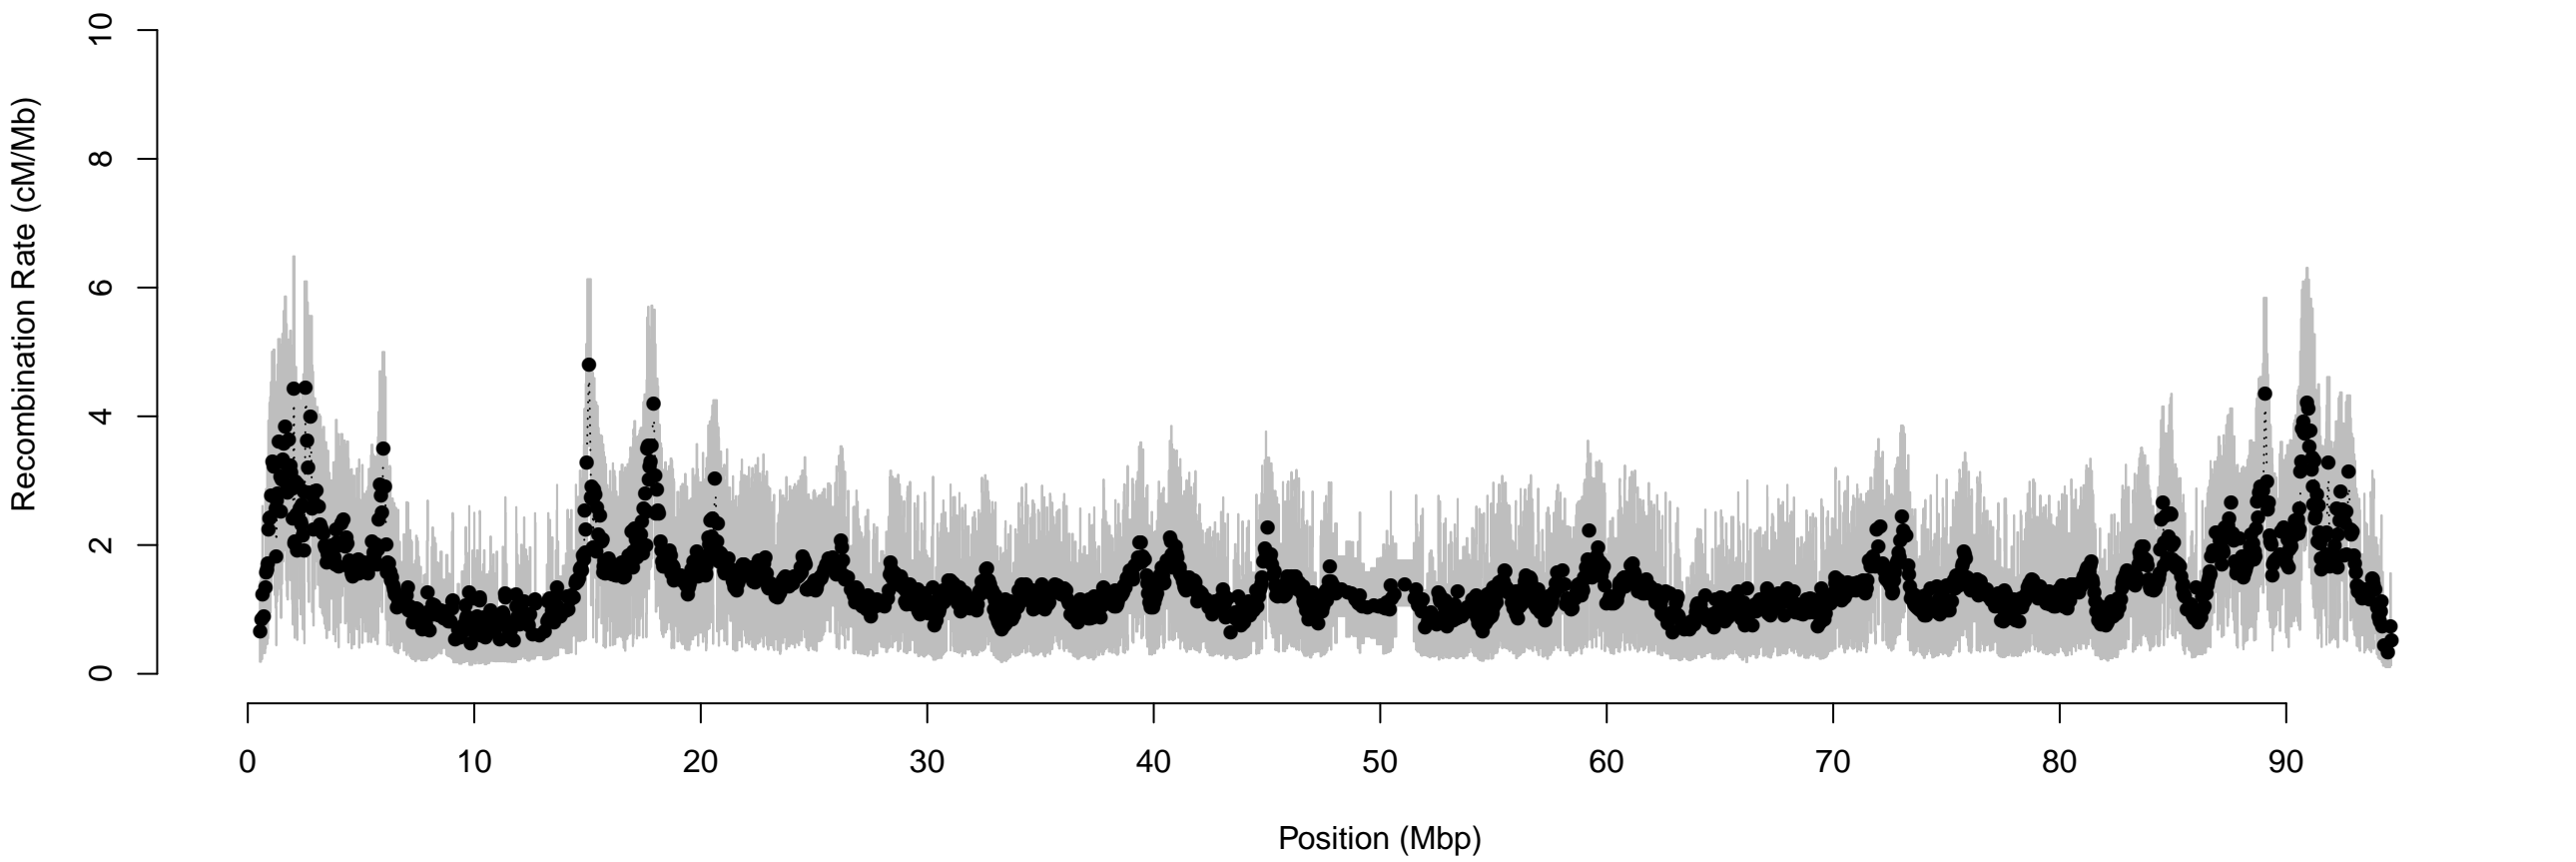

Chromosome 10 1Mb Windows

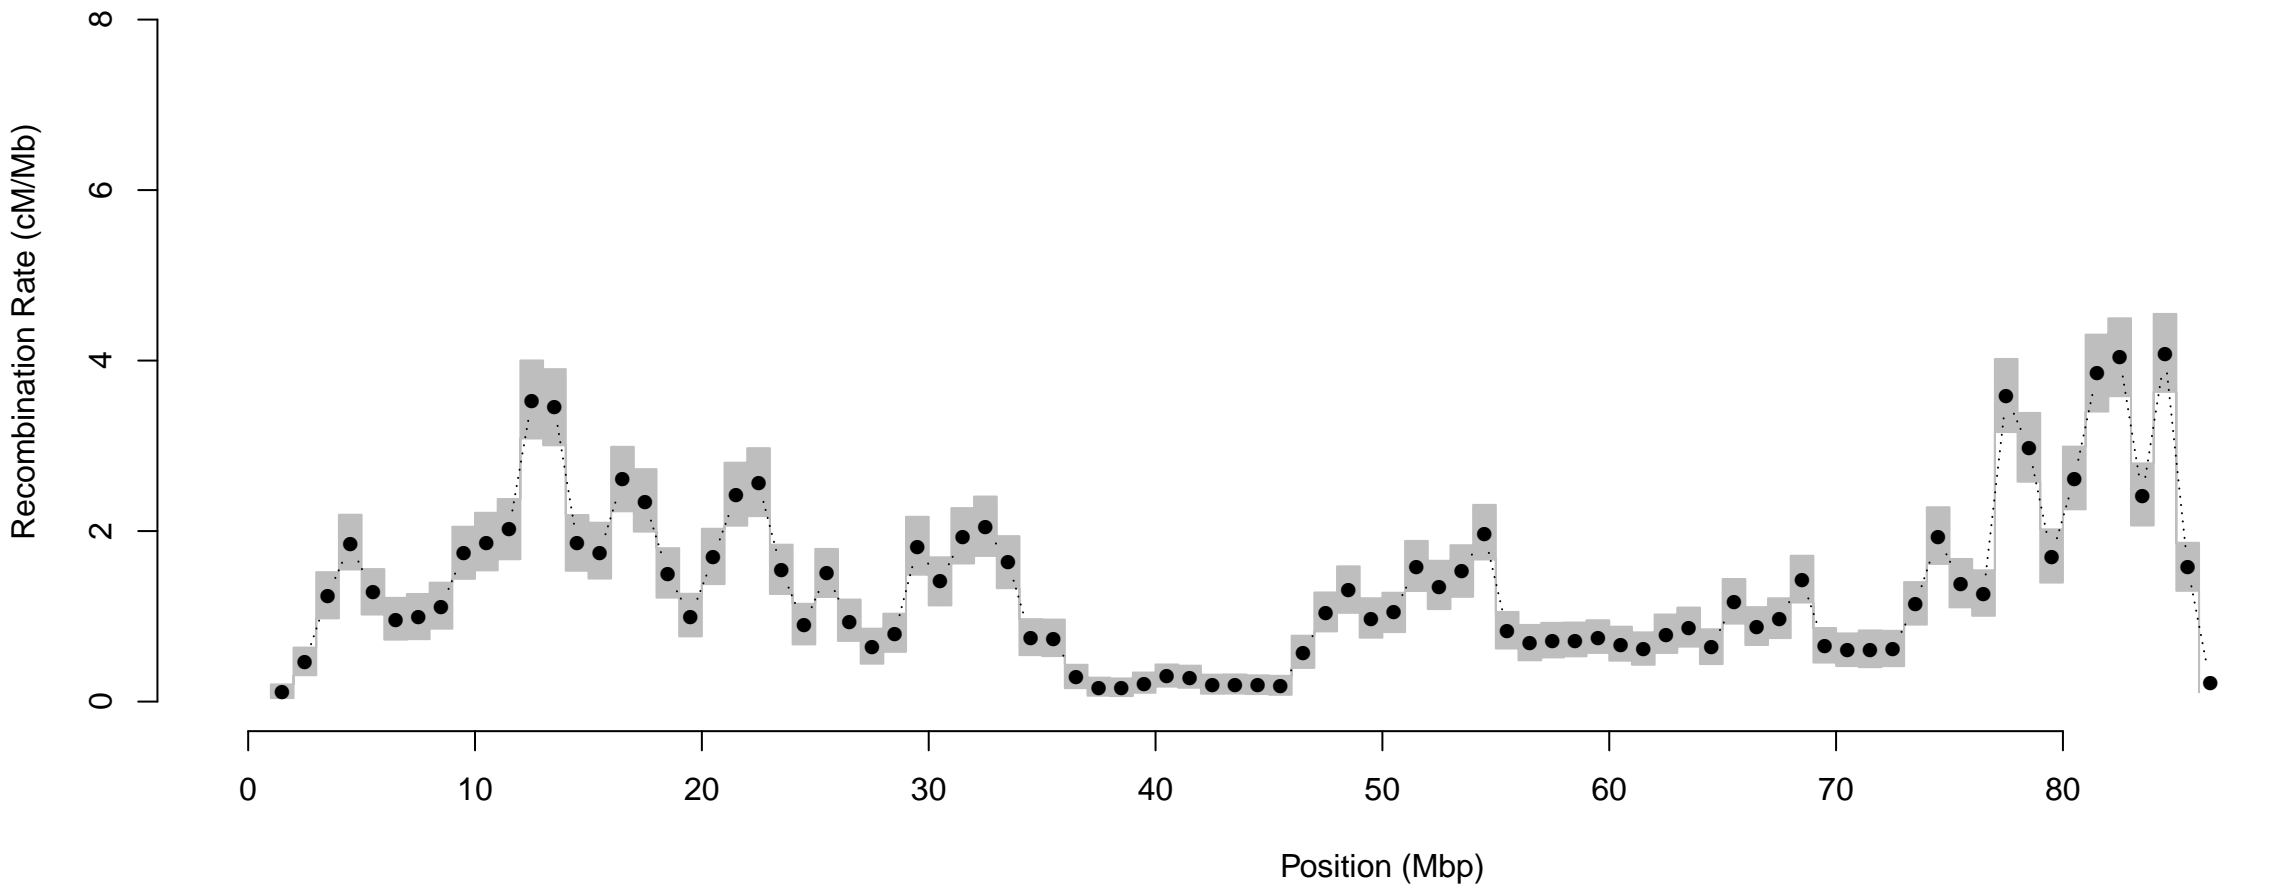

Chromosome 10 SNP array

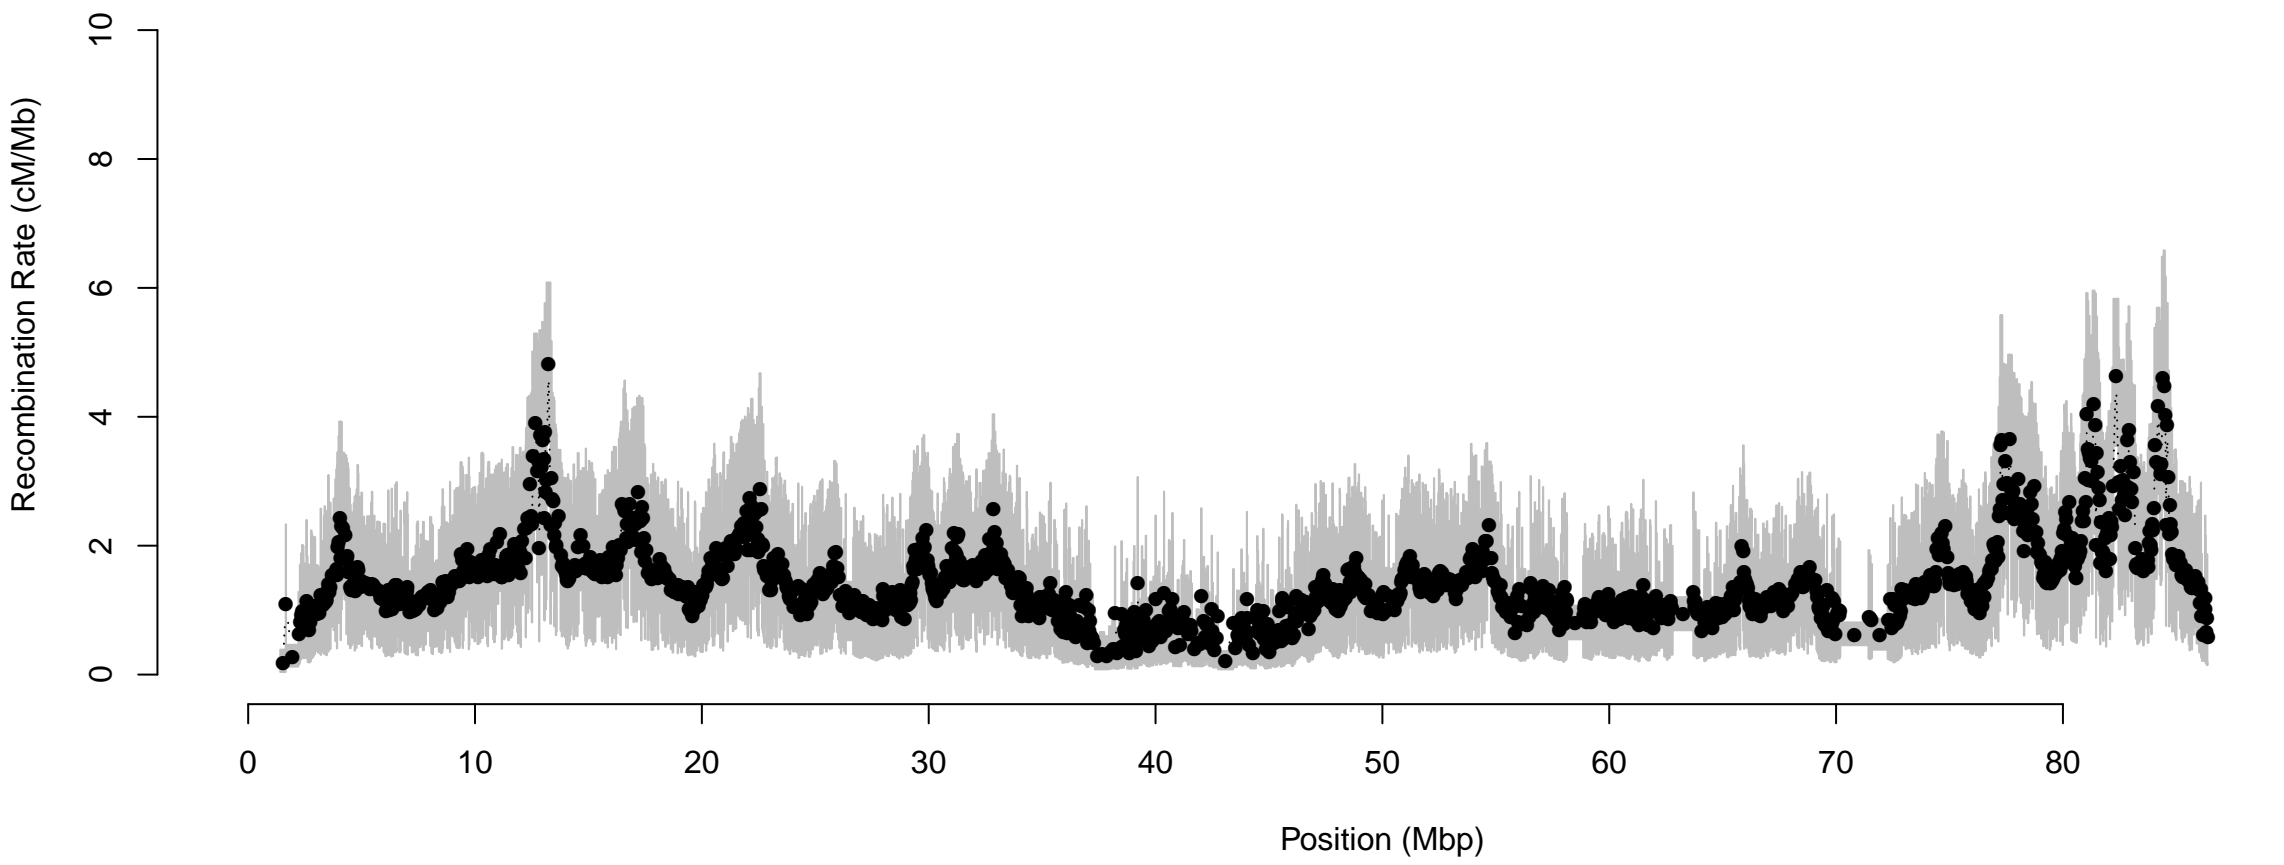

**Chromosome 11 1Mb Windows**

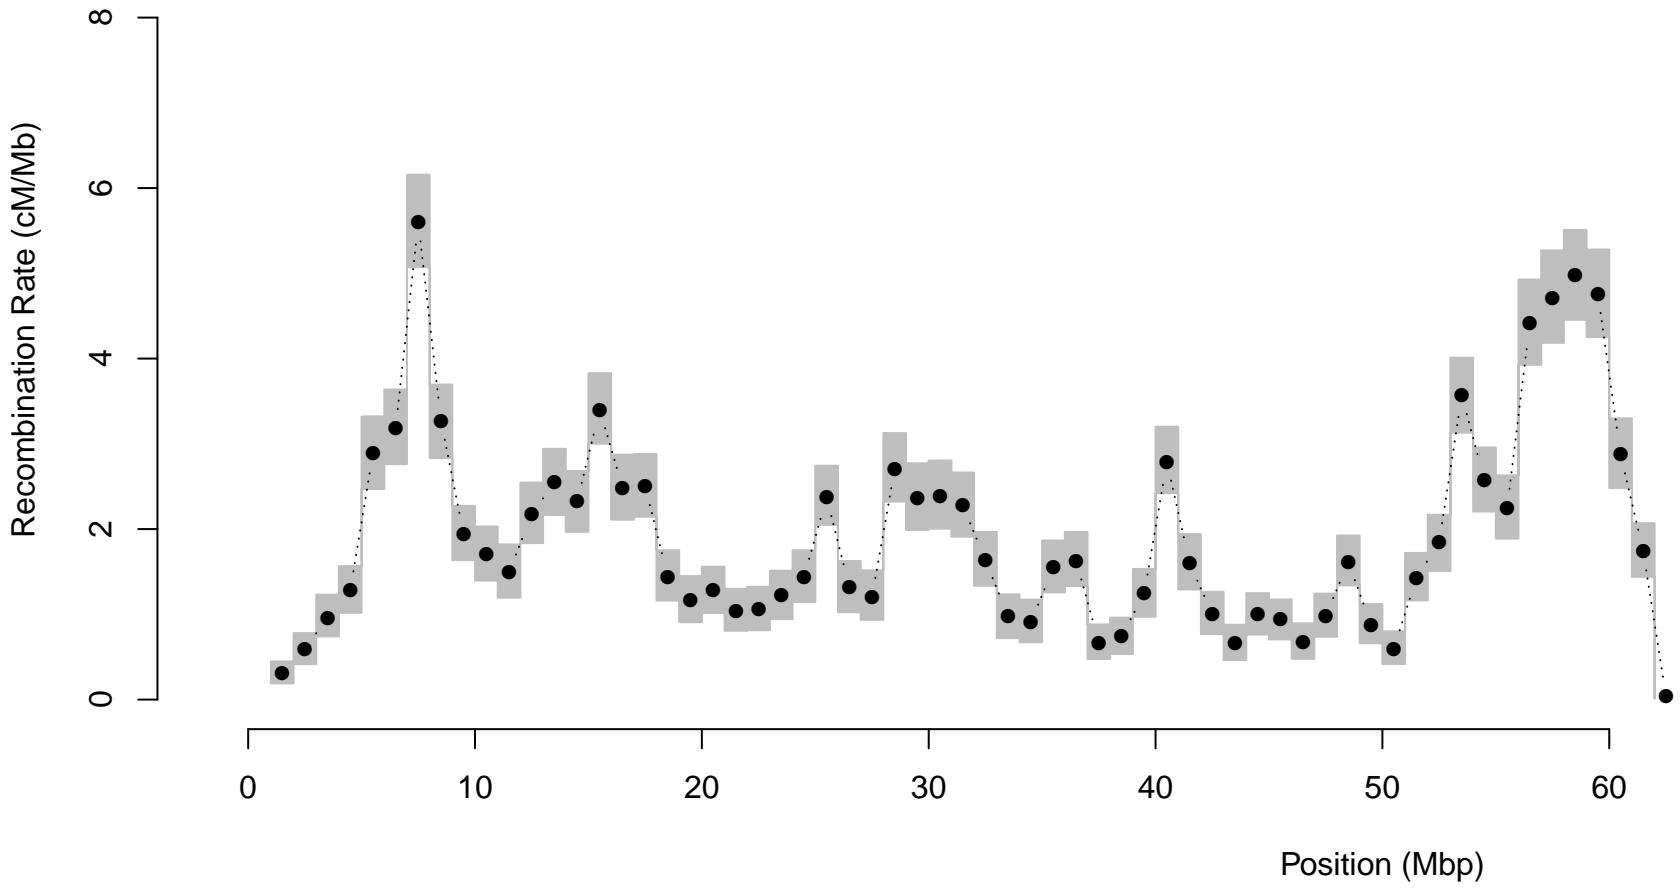

**Chromosome 11 SNP array**

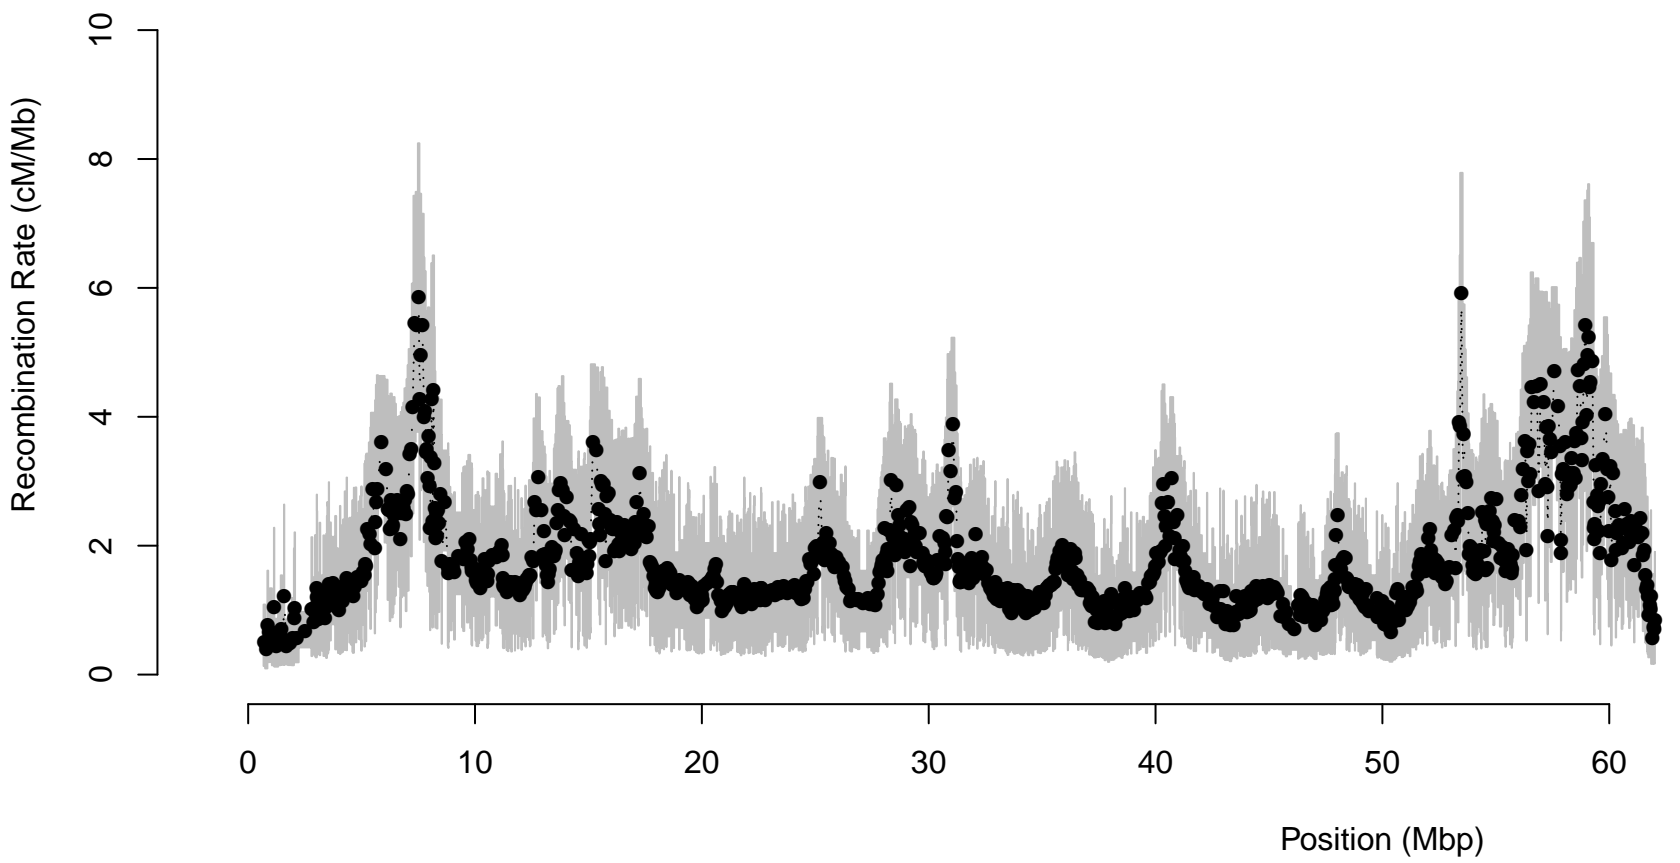

**Chromosome 12 1Mb Windows**

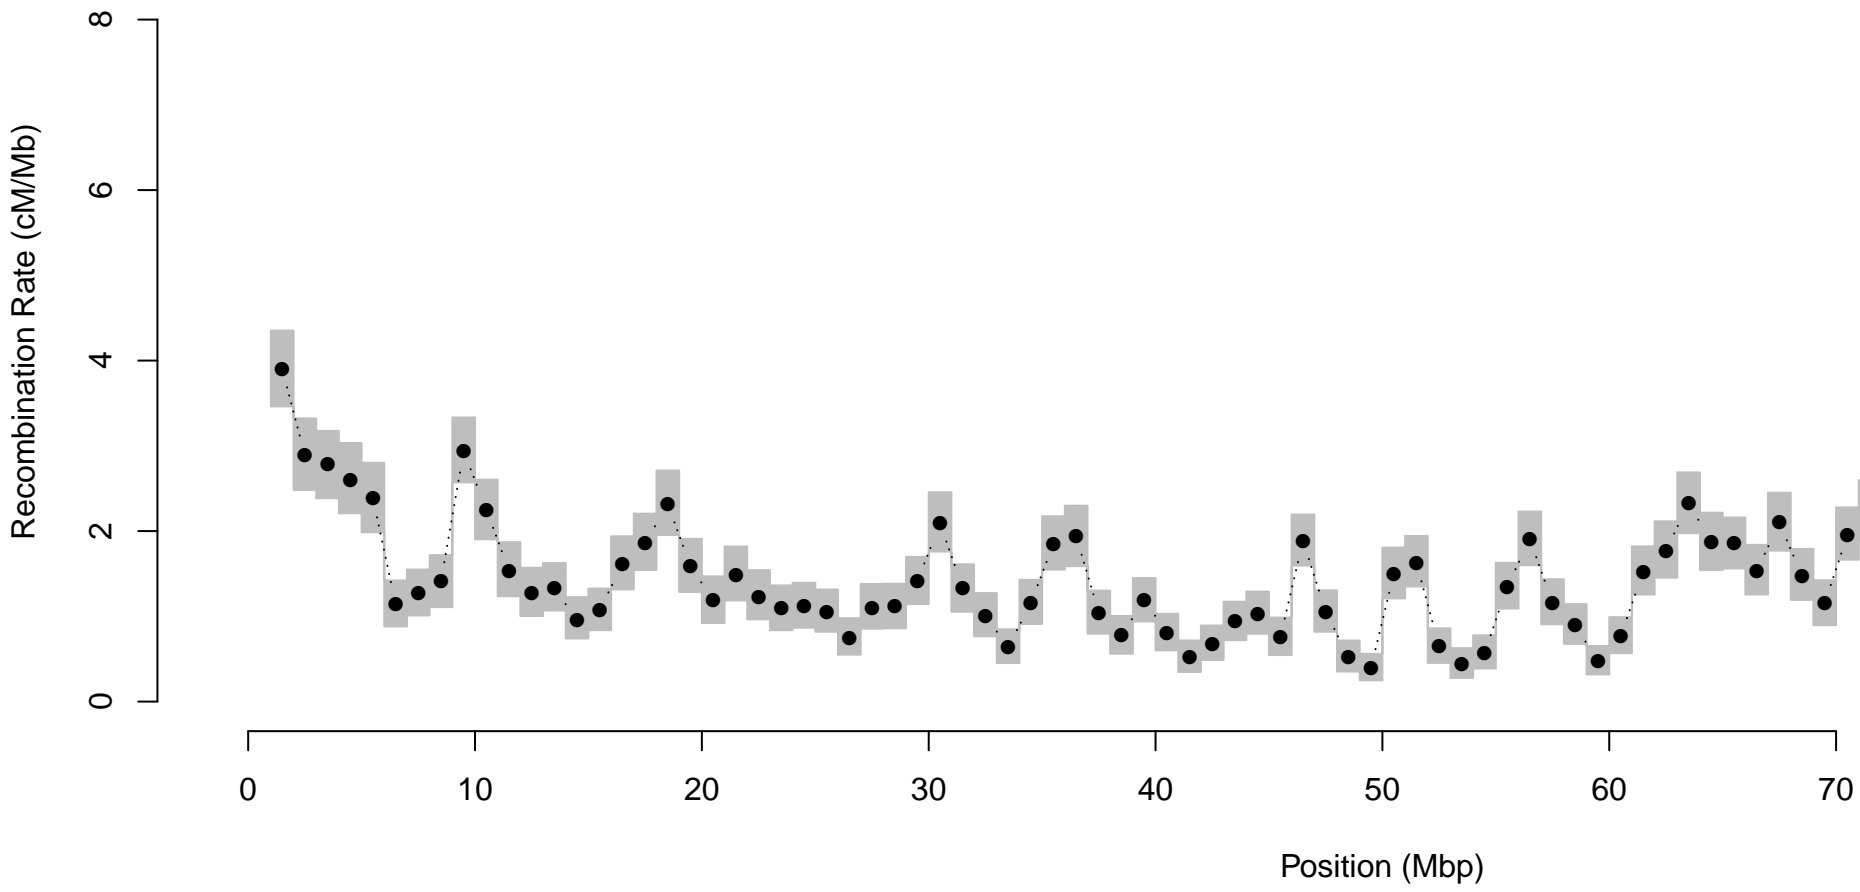

**Chromosome 12 SNP array**

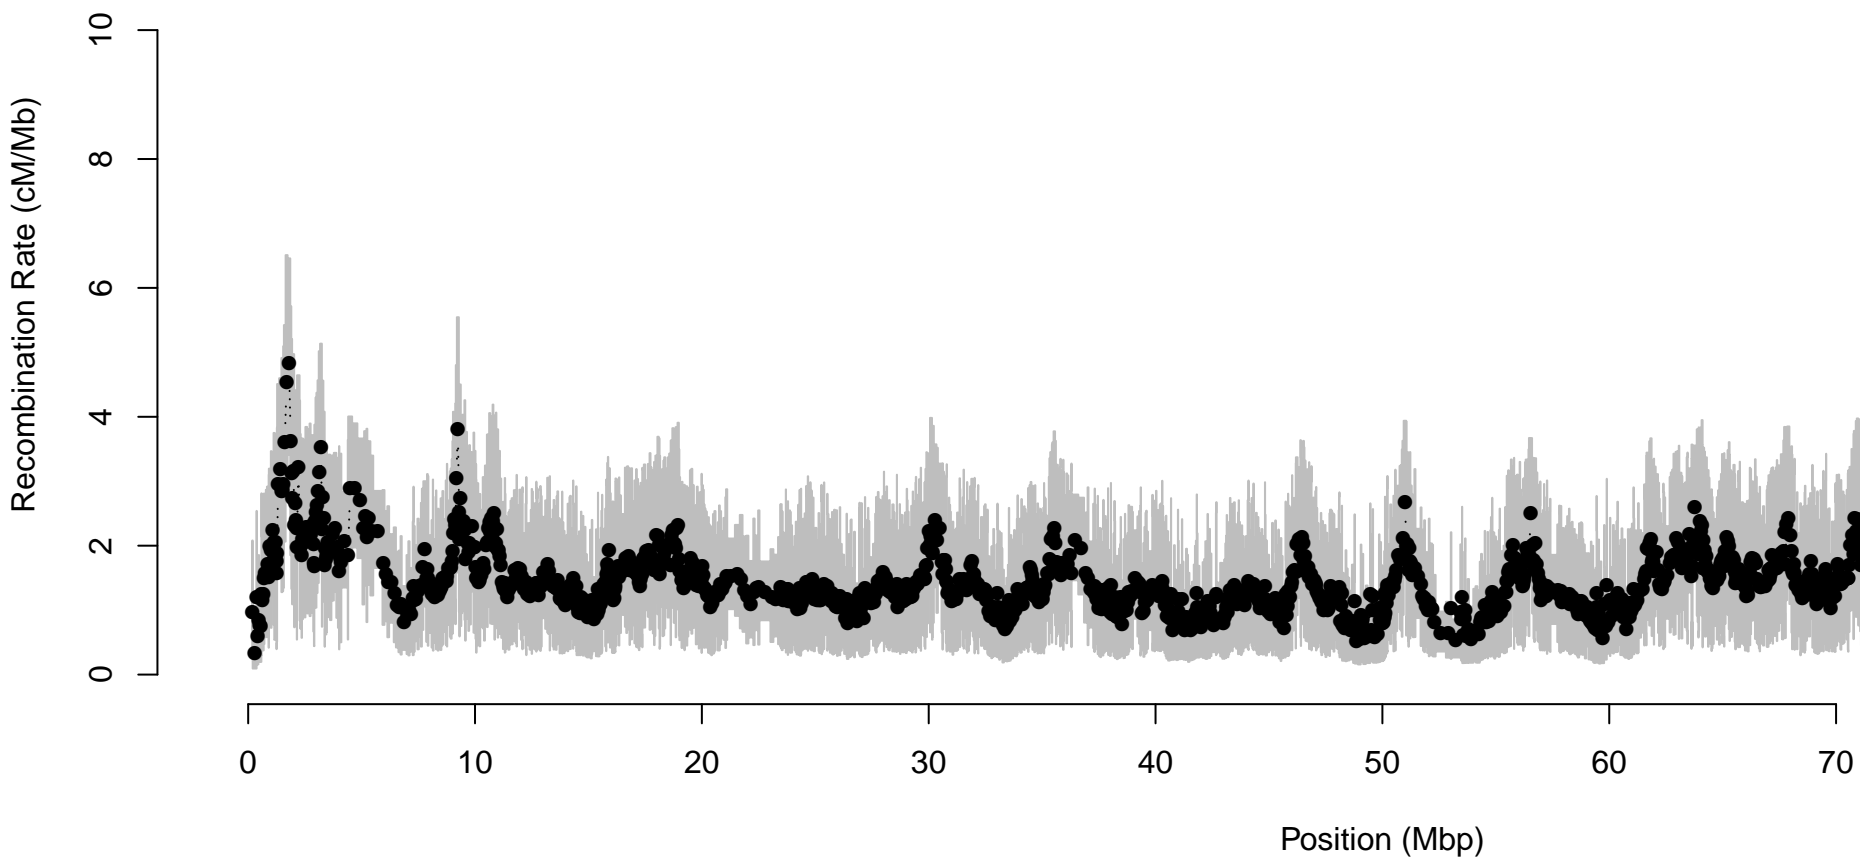

**Chromosome 13 1Mb Windows**

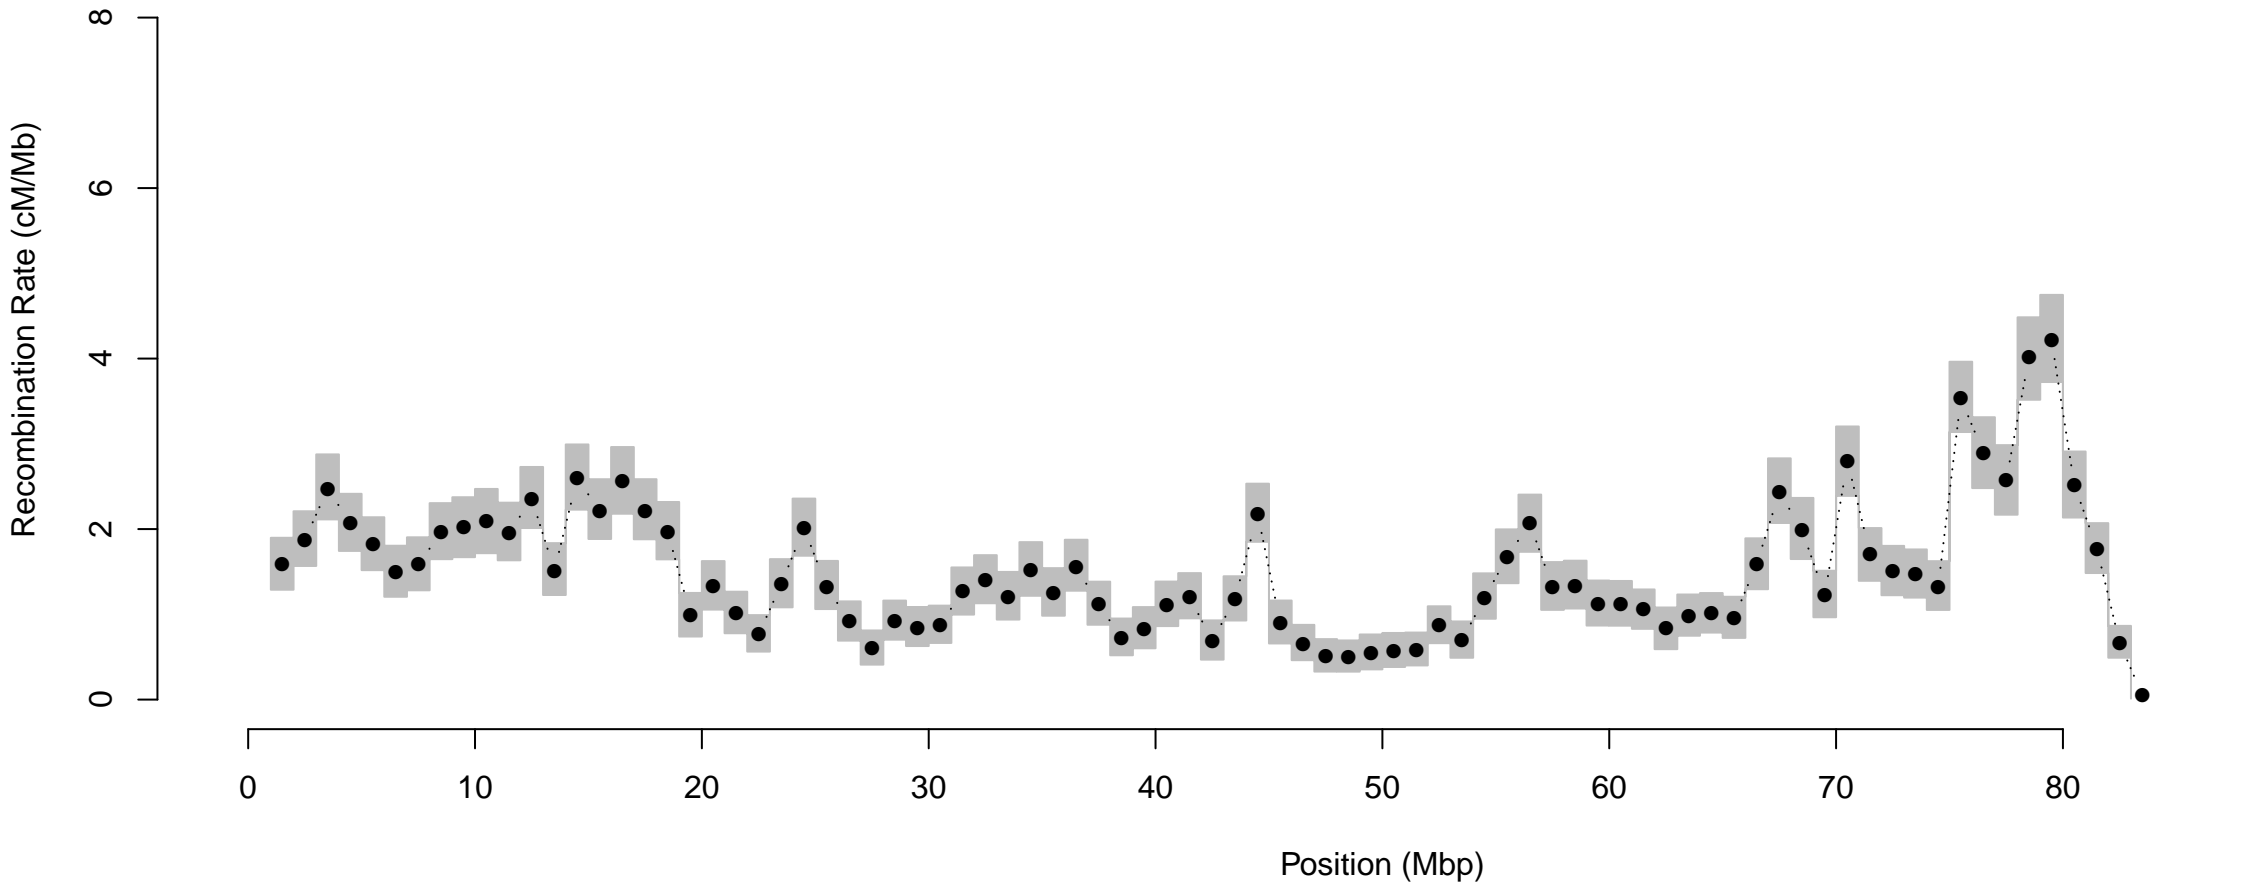

**Chromosome 13 SNP array**

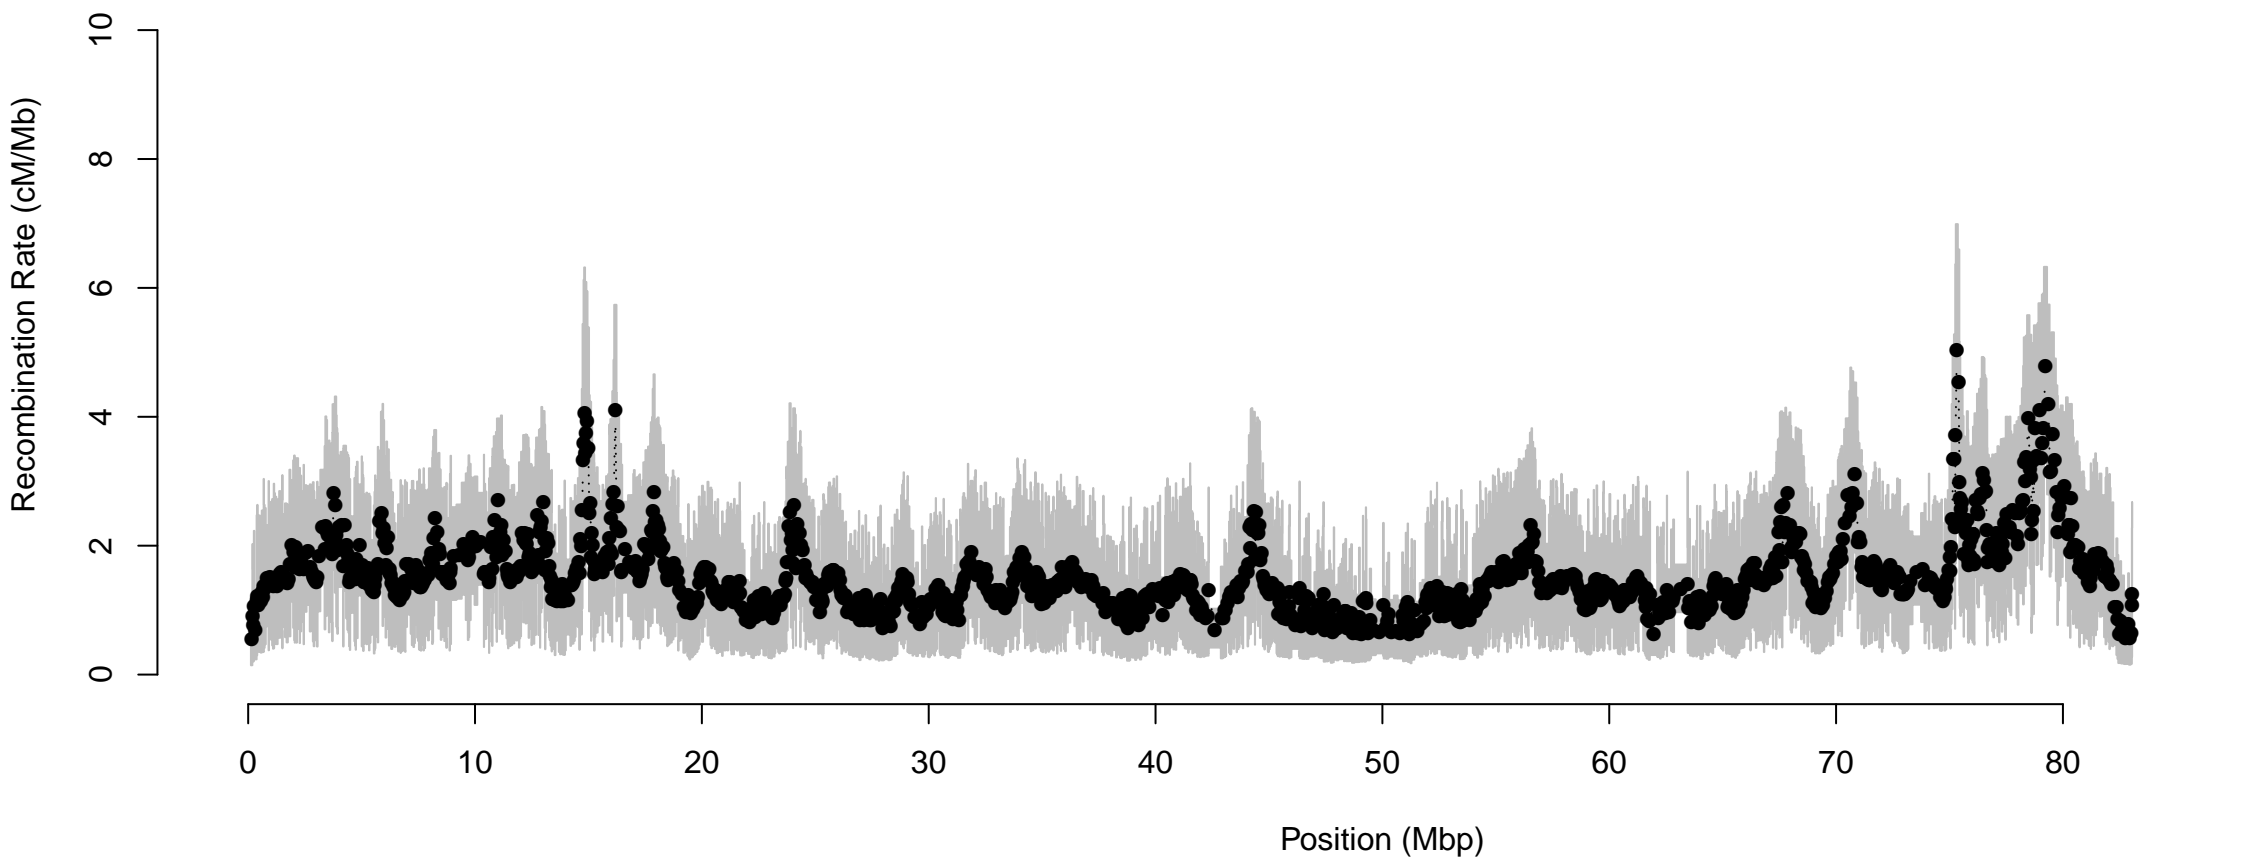

**Chromosome 14 1Mb Windows**

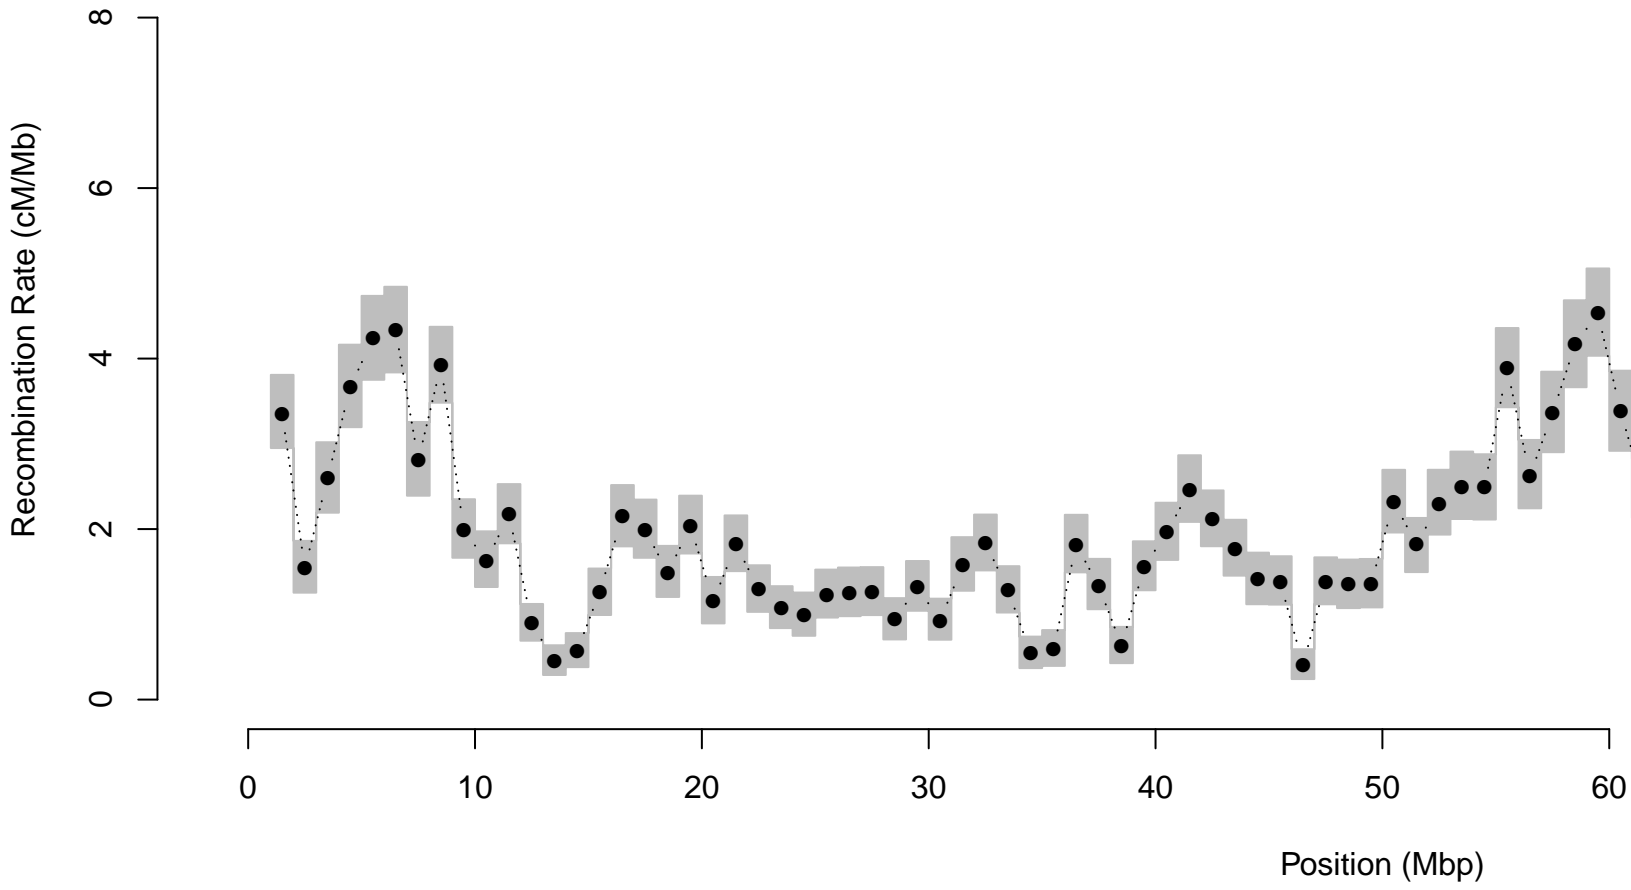

**Chromosome 14 SNP array**

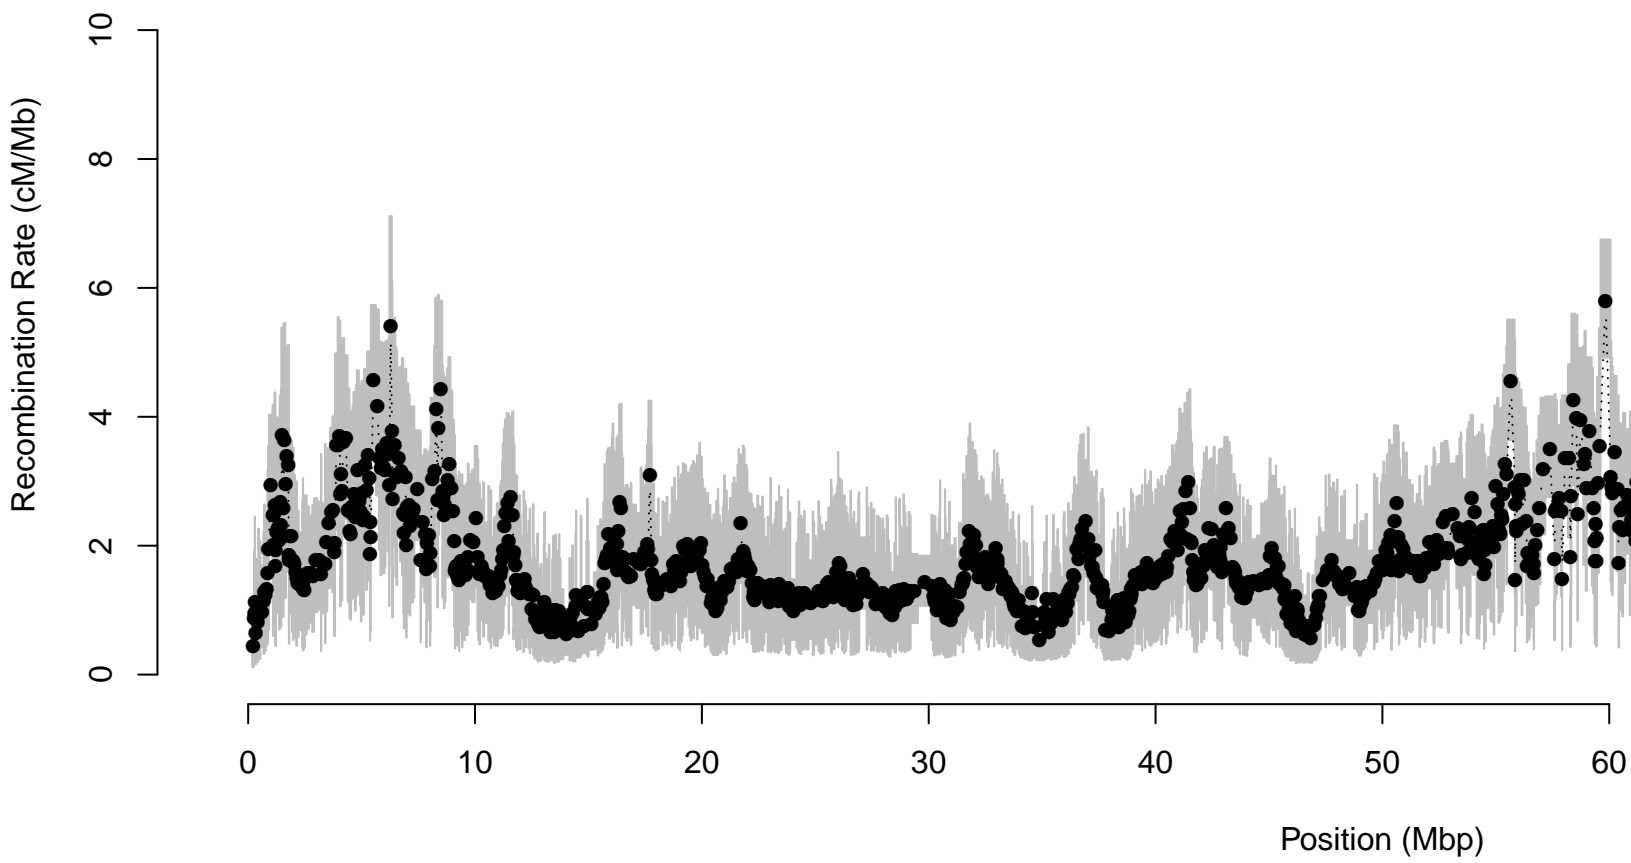

**Chromosome 15 1Mb Windows**

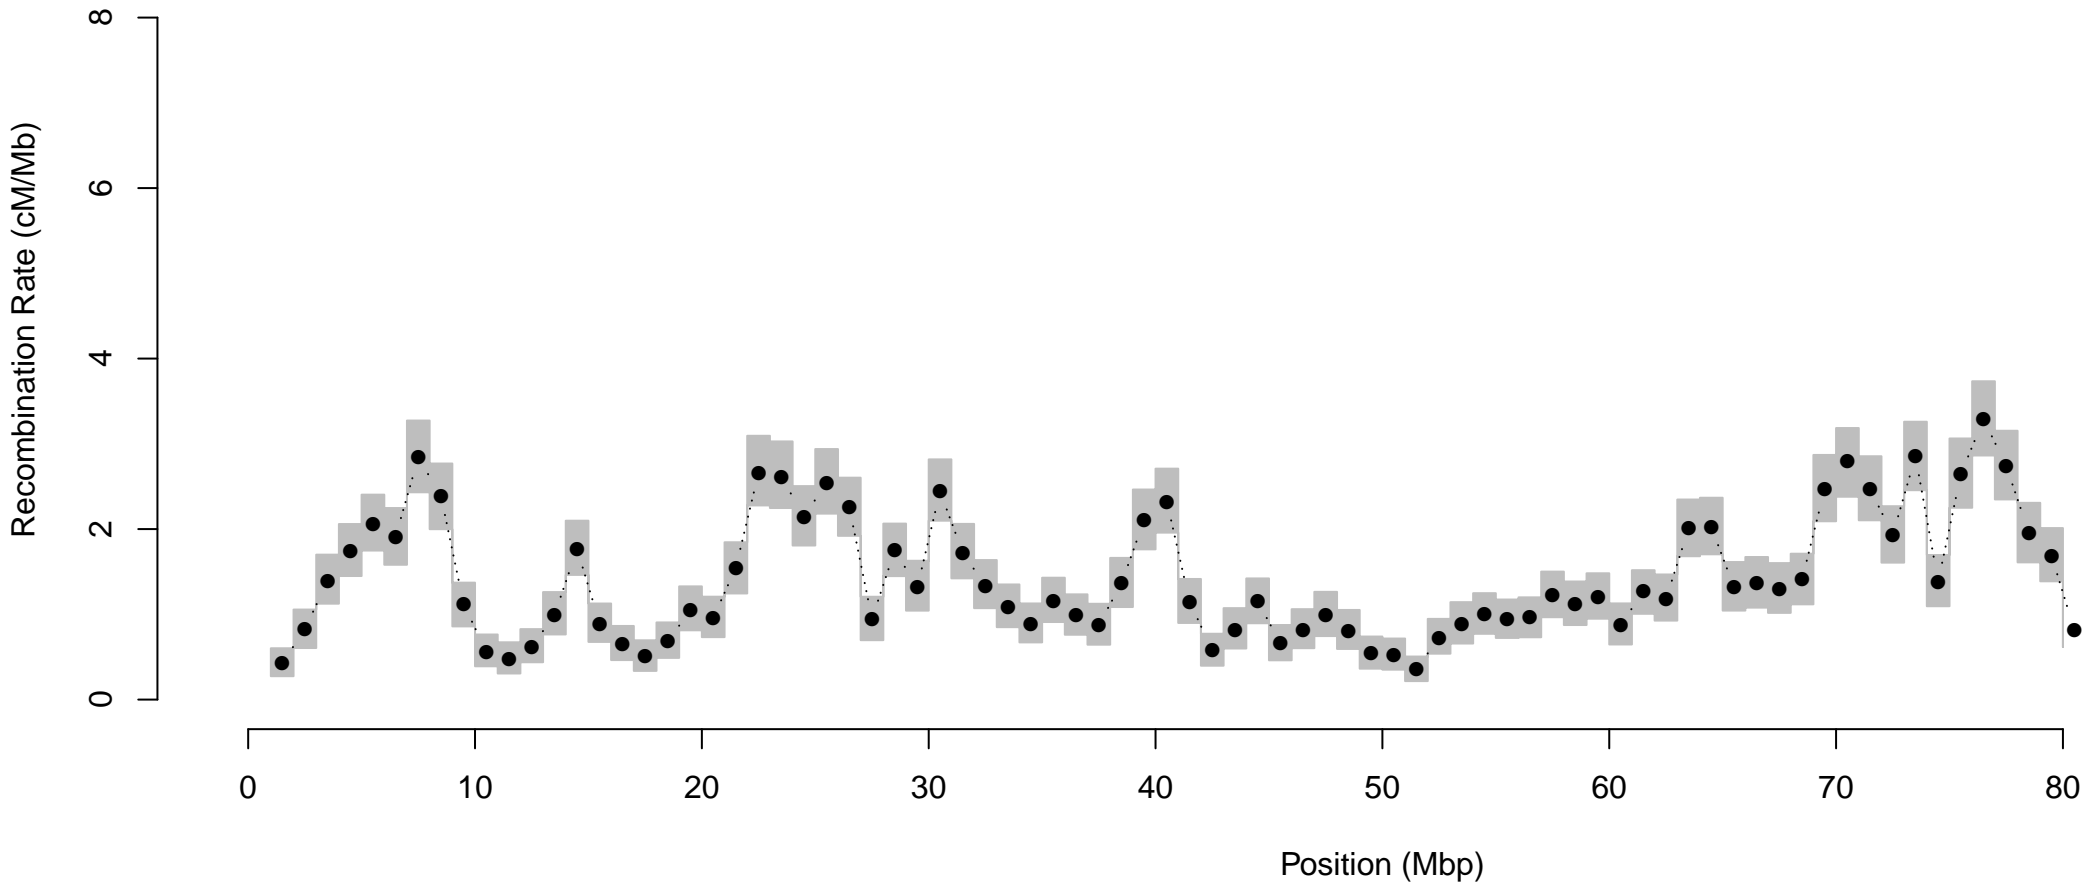

**Chromosome 15 SNP array**

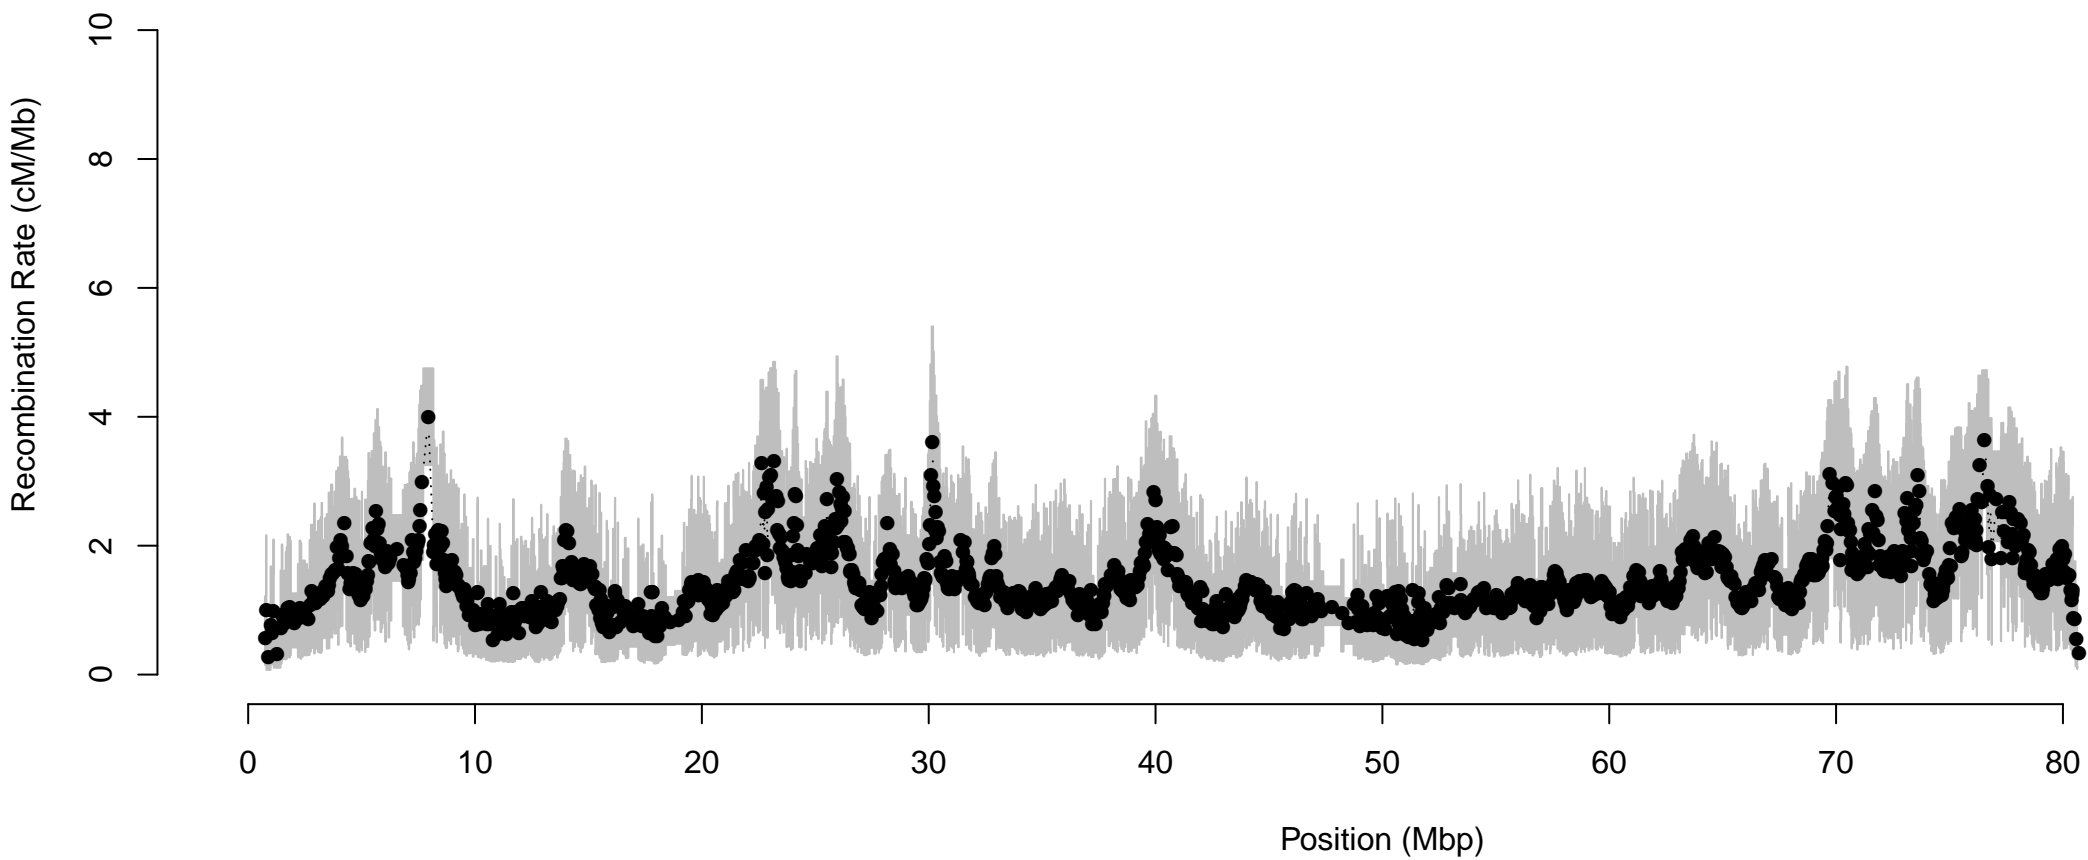



**Chromosome 16 1Mb Windows**

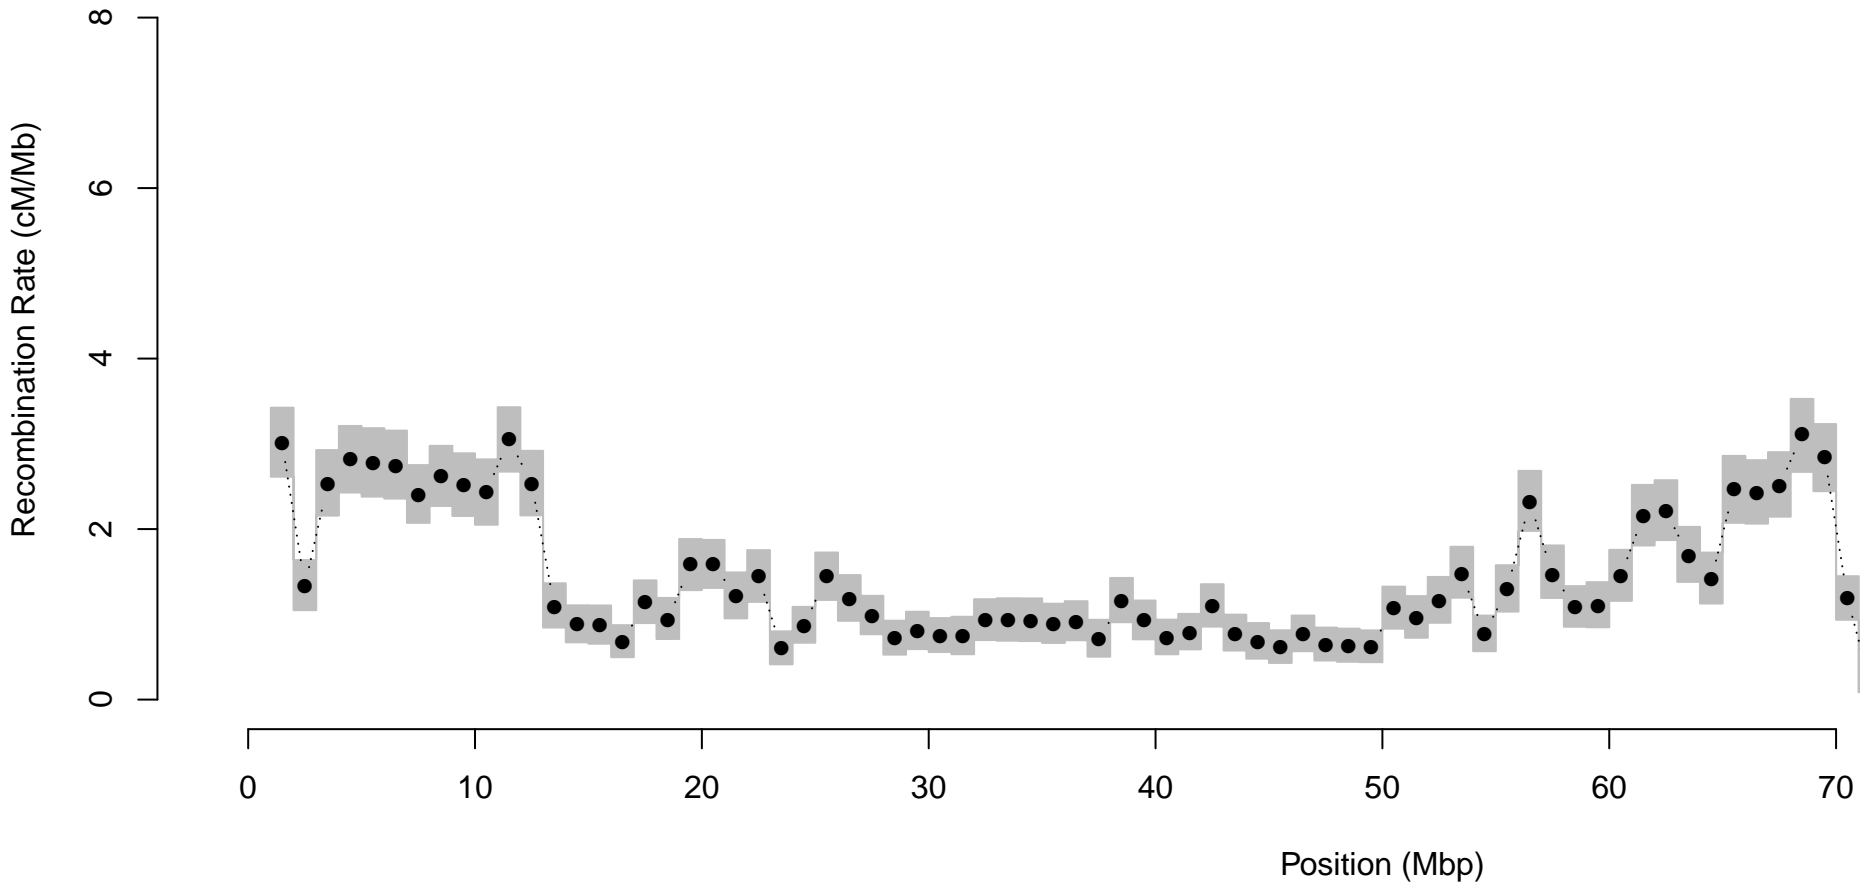

**Chromosome 16 SNP array**

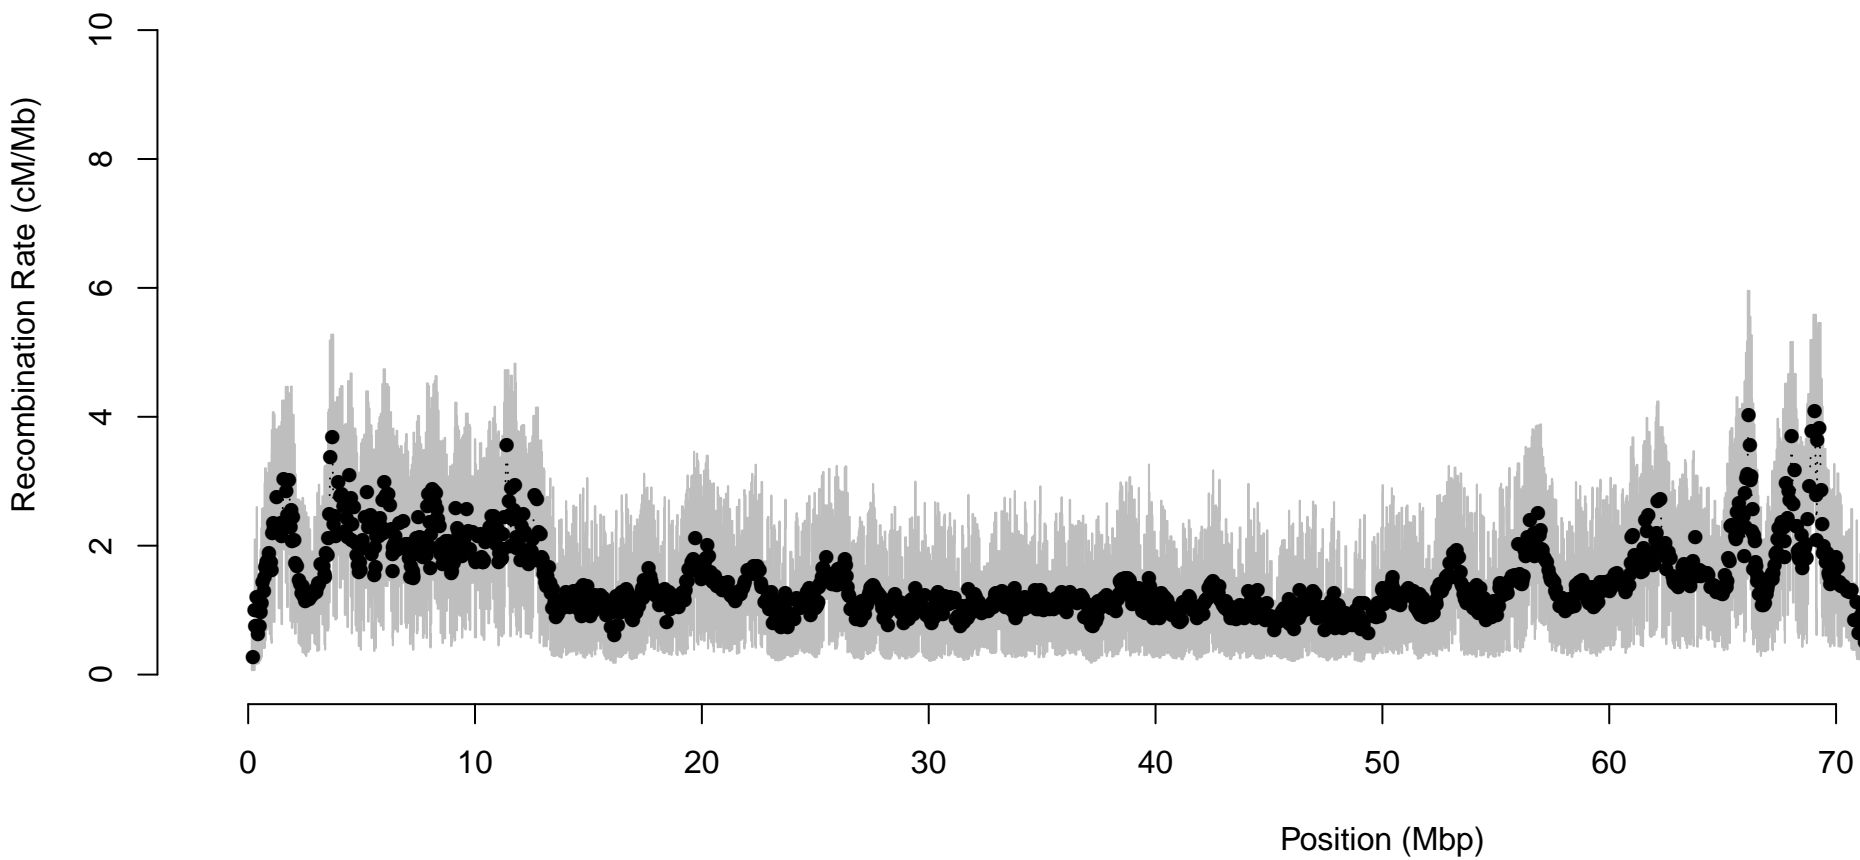

**Chromosome 17 1Mb Windows**

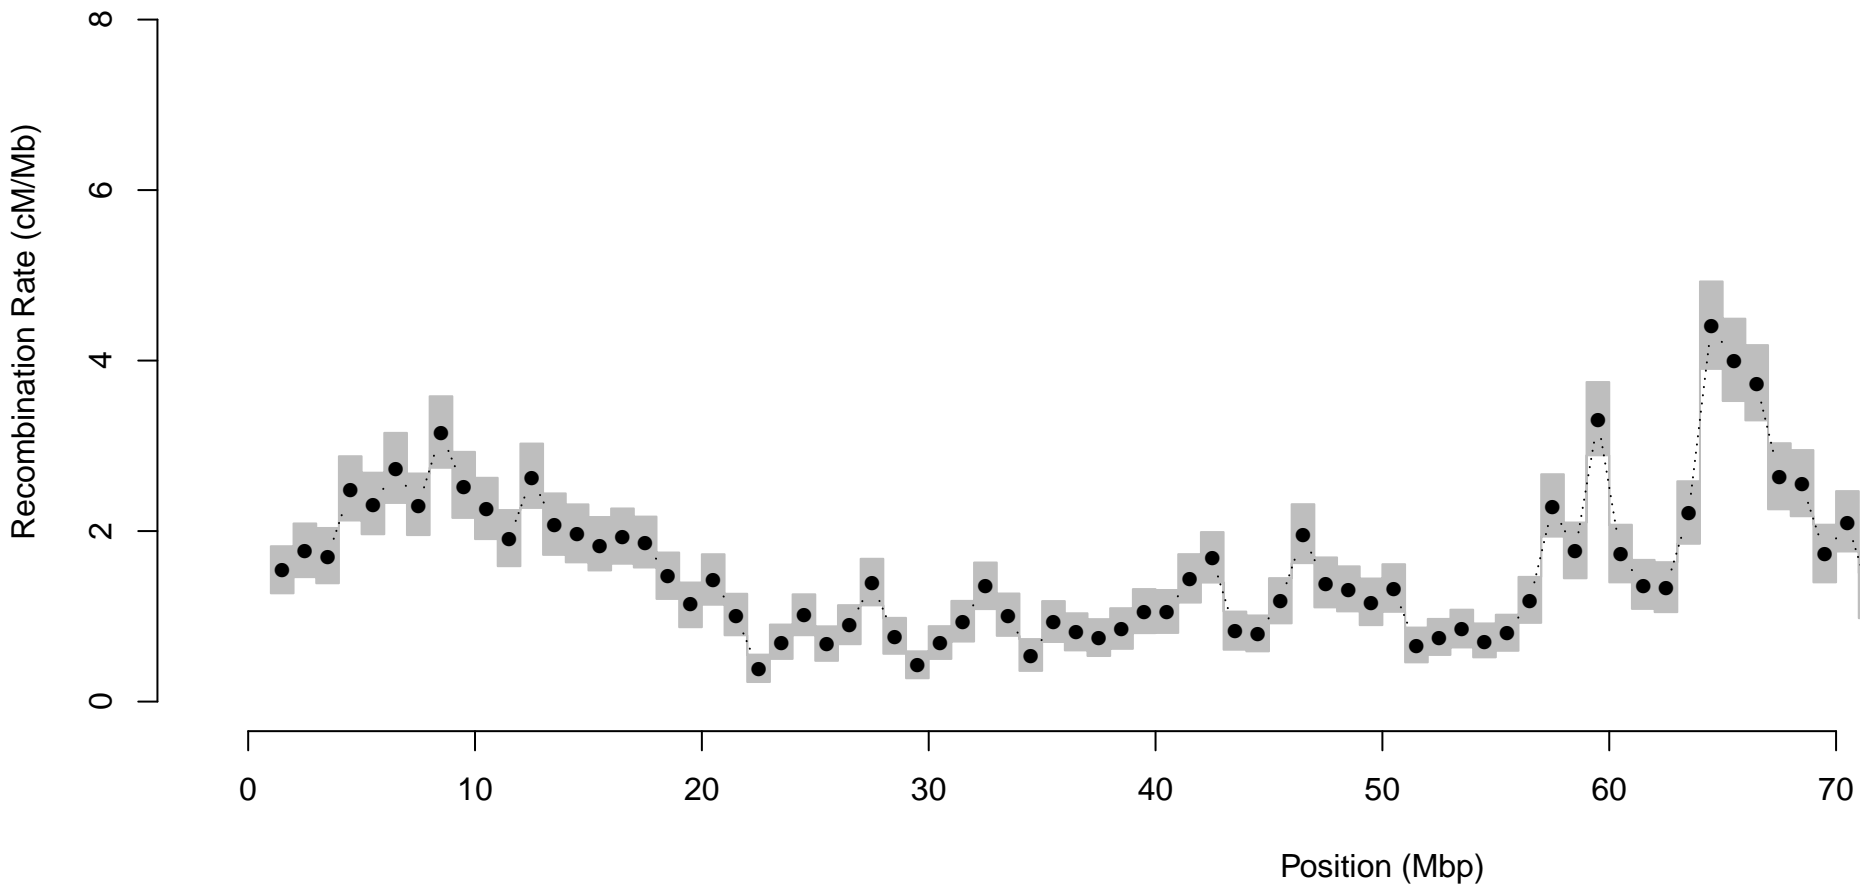

**Chromosome 17 SNP array**

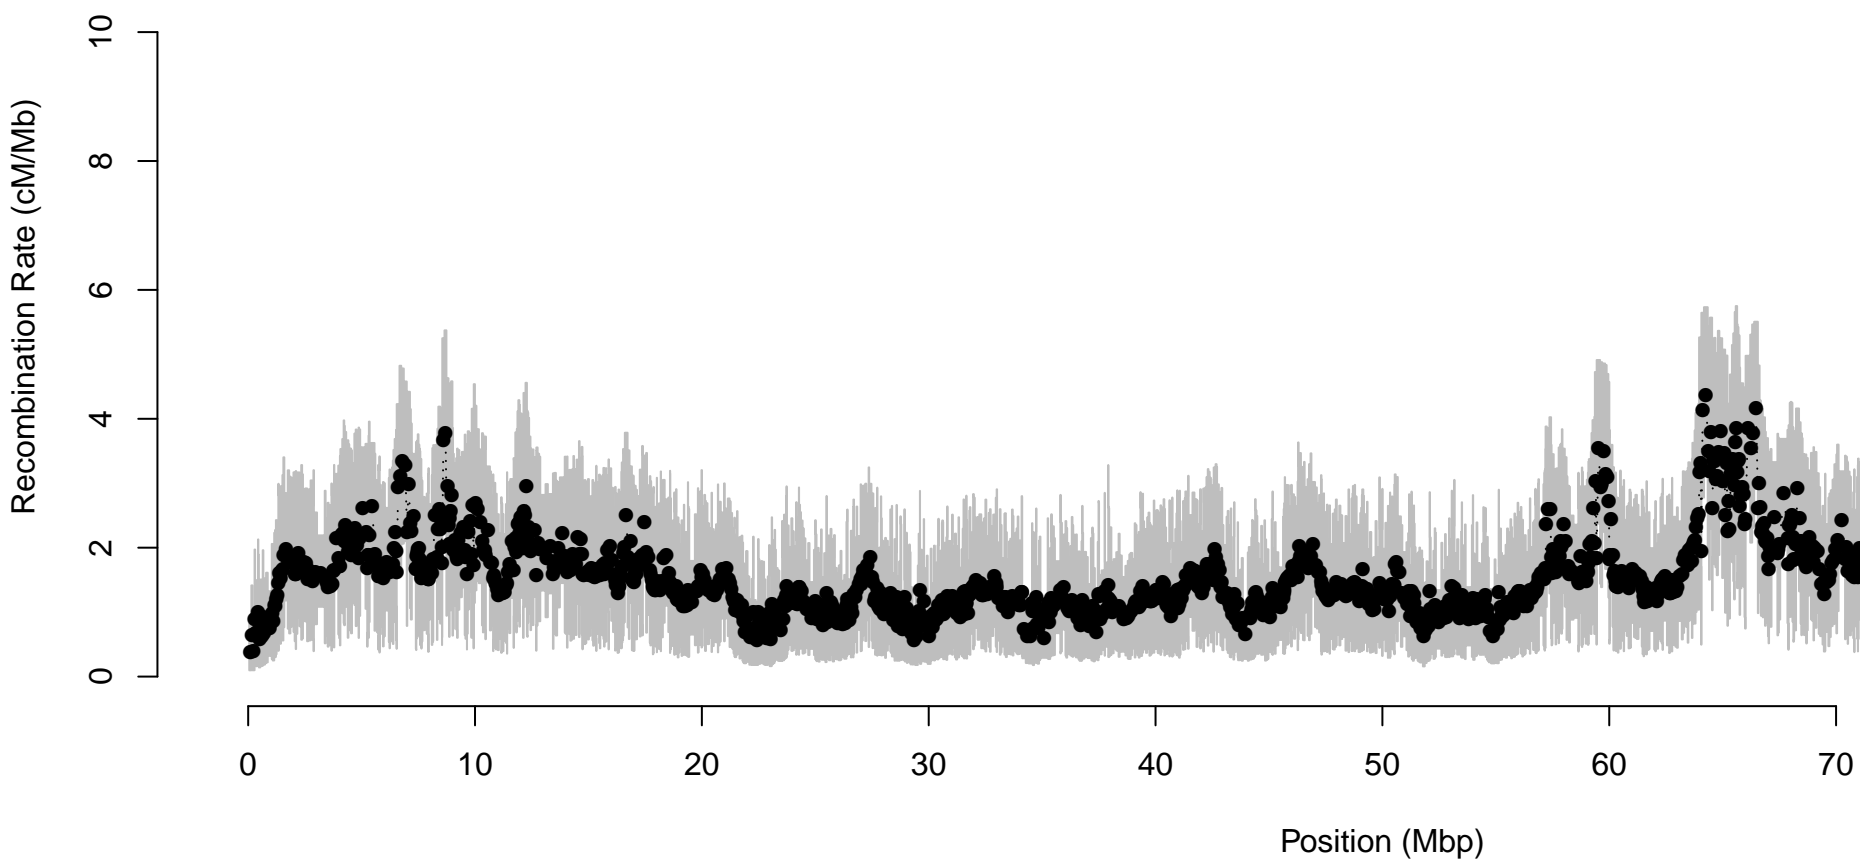

**Chromosome 18 1Mb Windows**

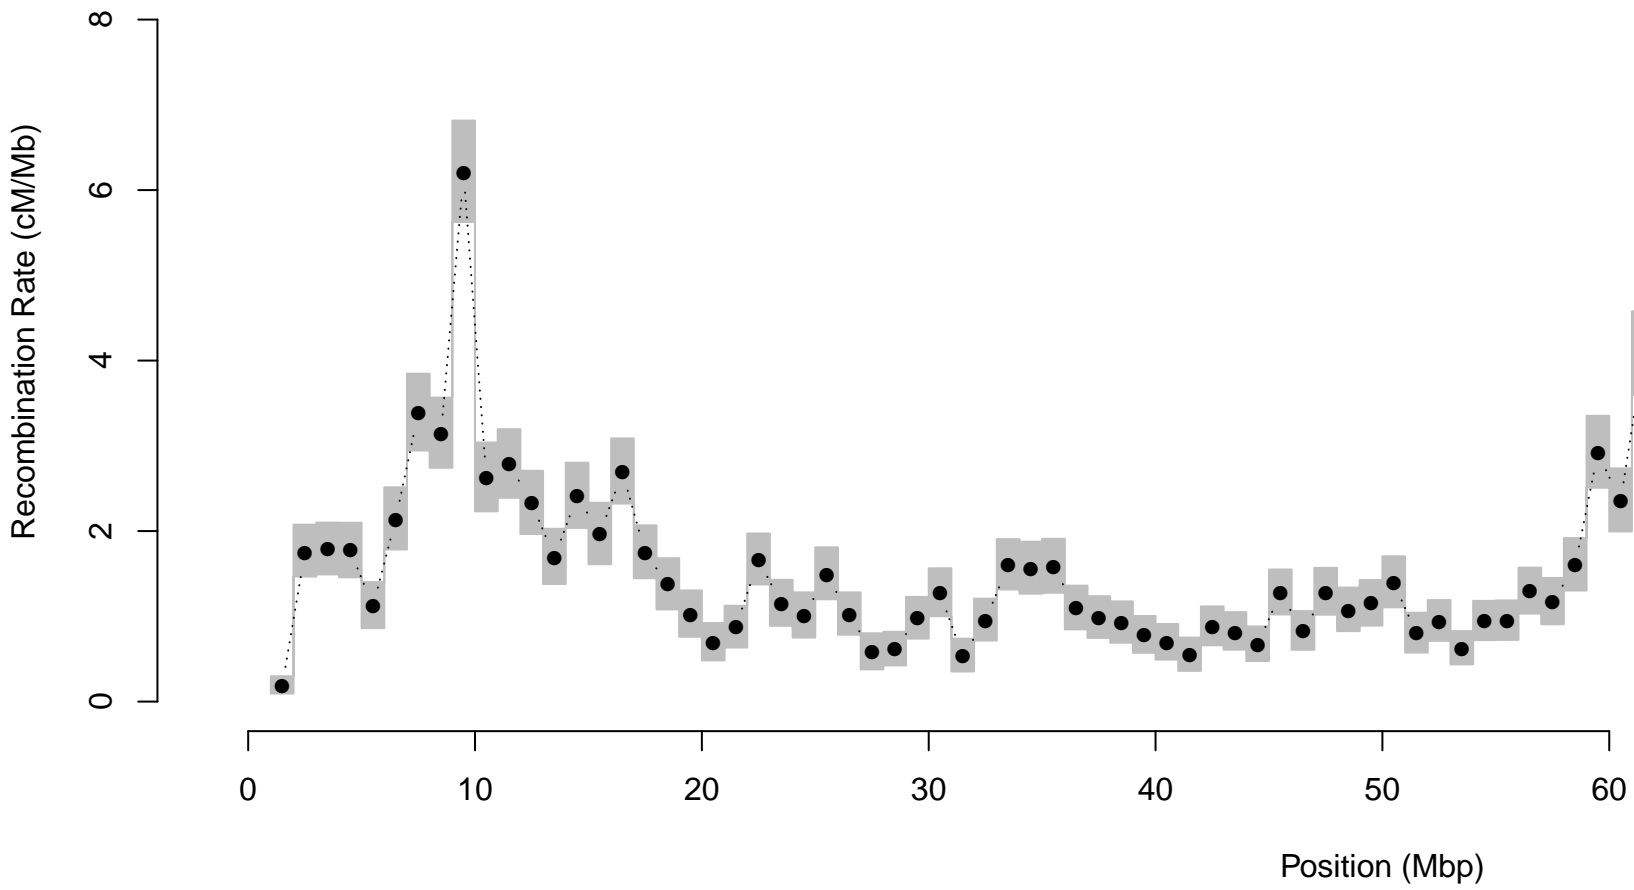

**Chromosome 18 SNP array**

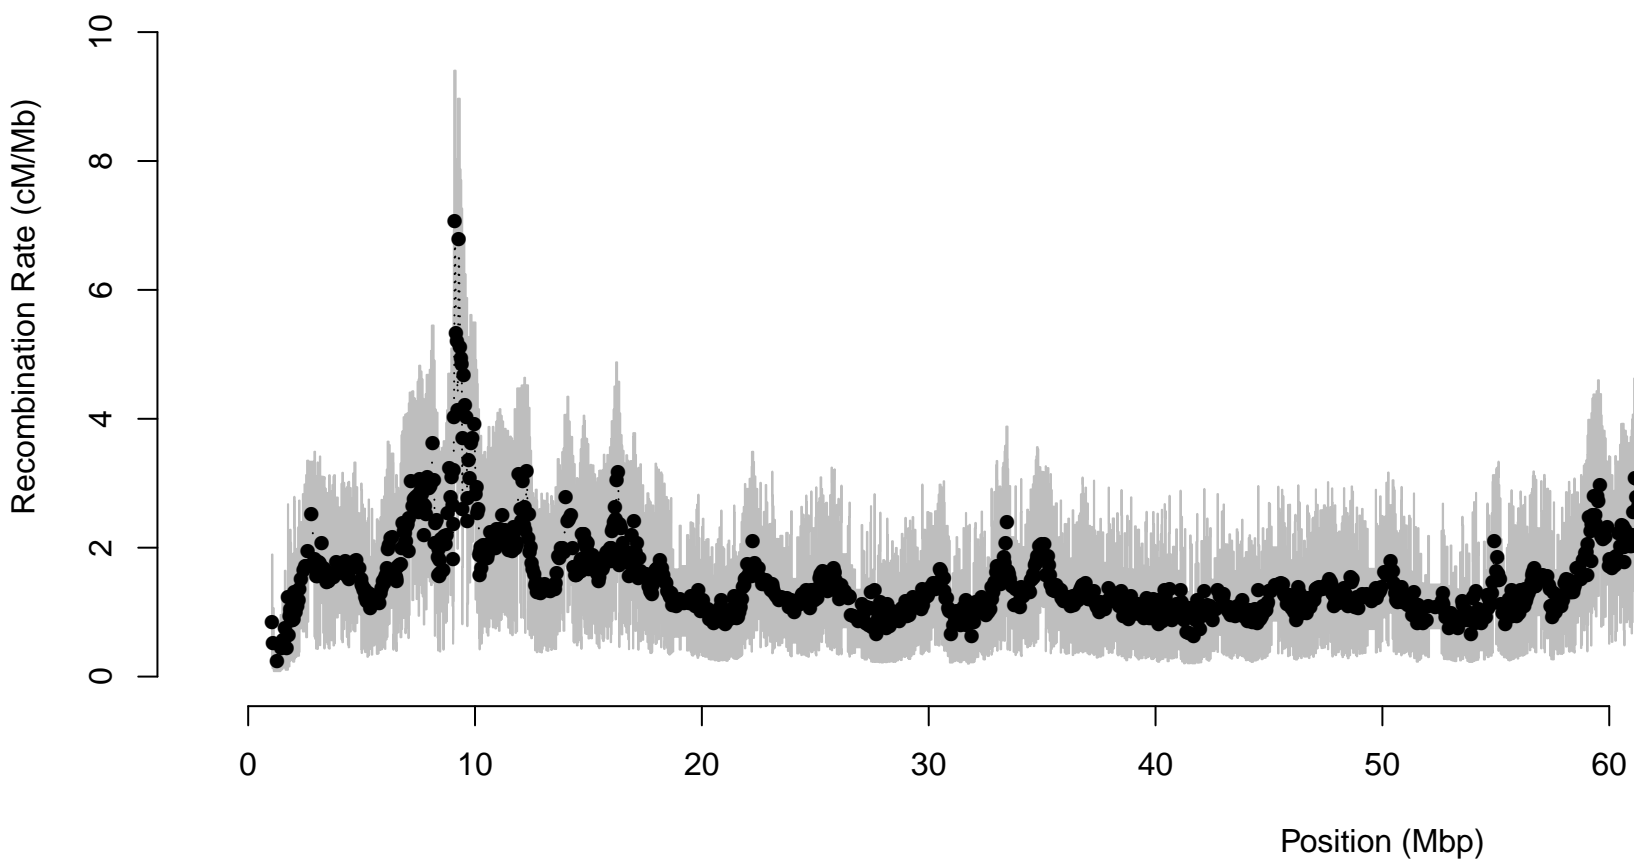

**Chromosome 19 1Mb Windows**

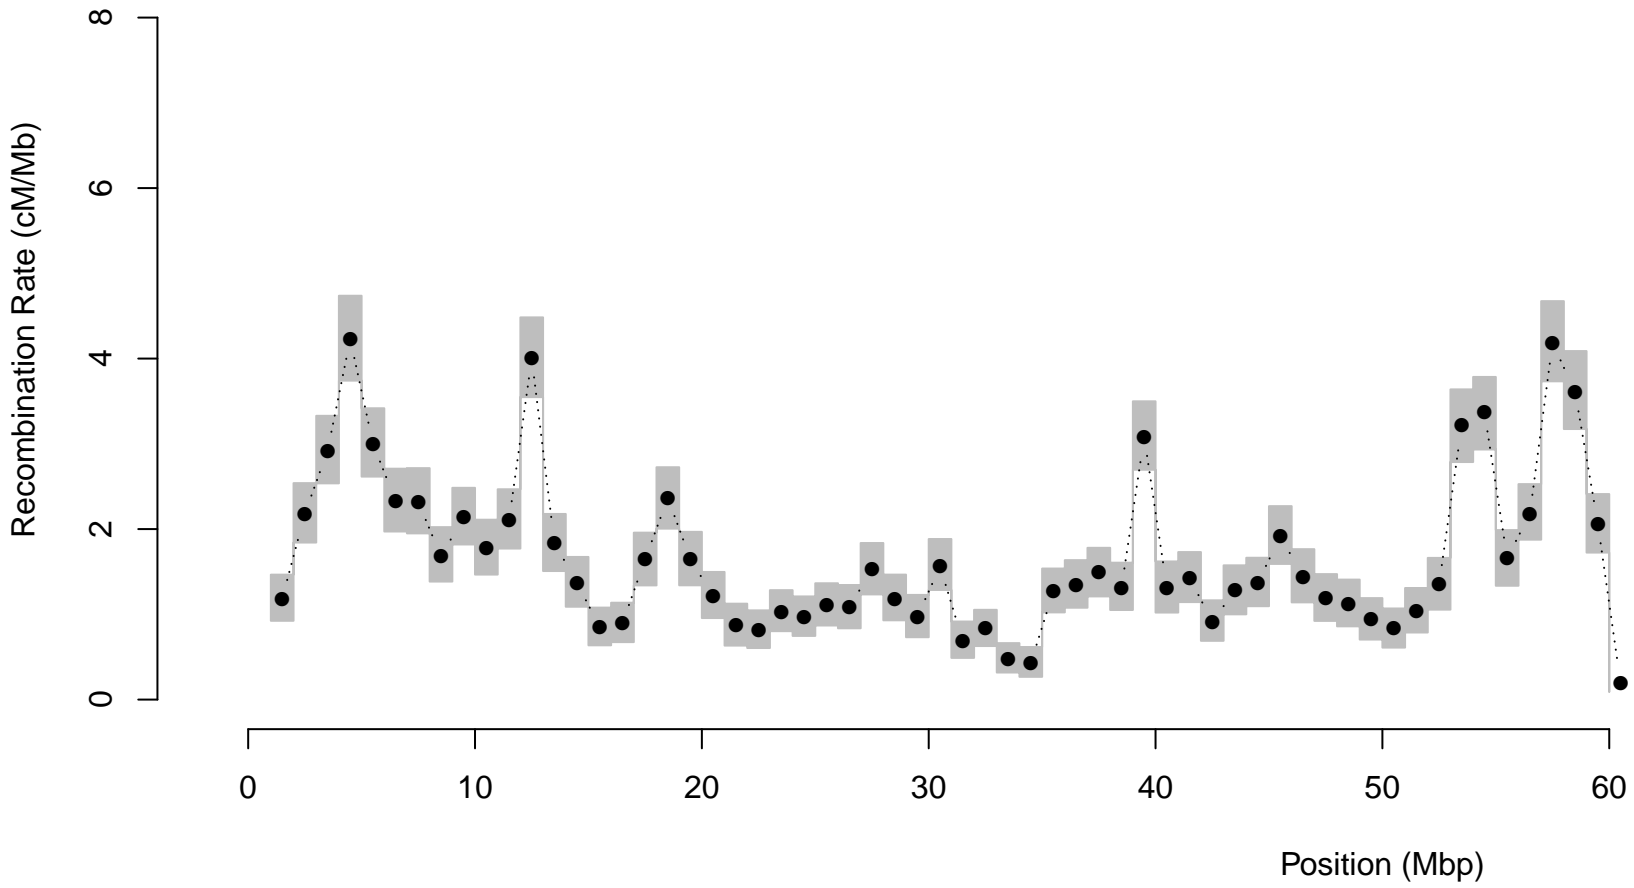

**Chromosome 19 SNP array**

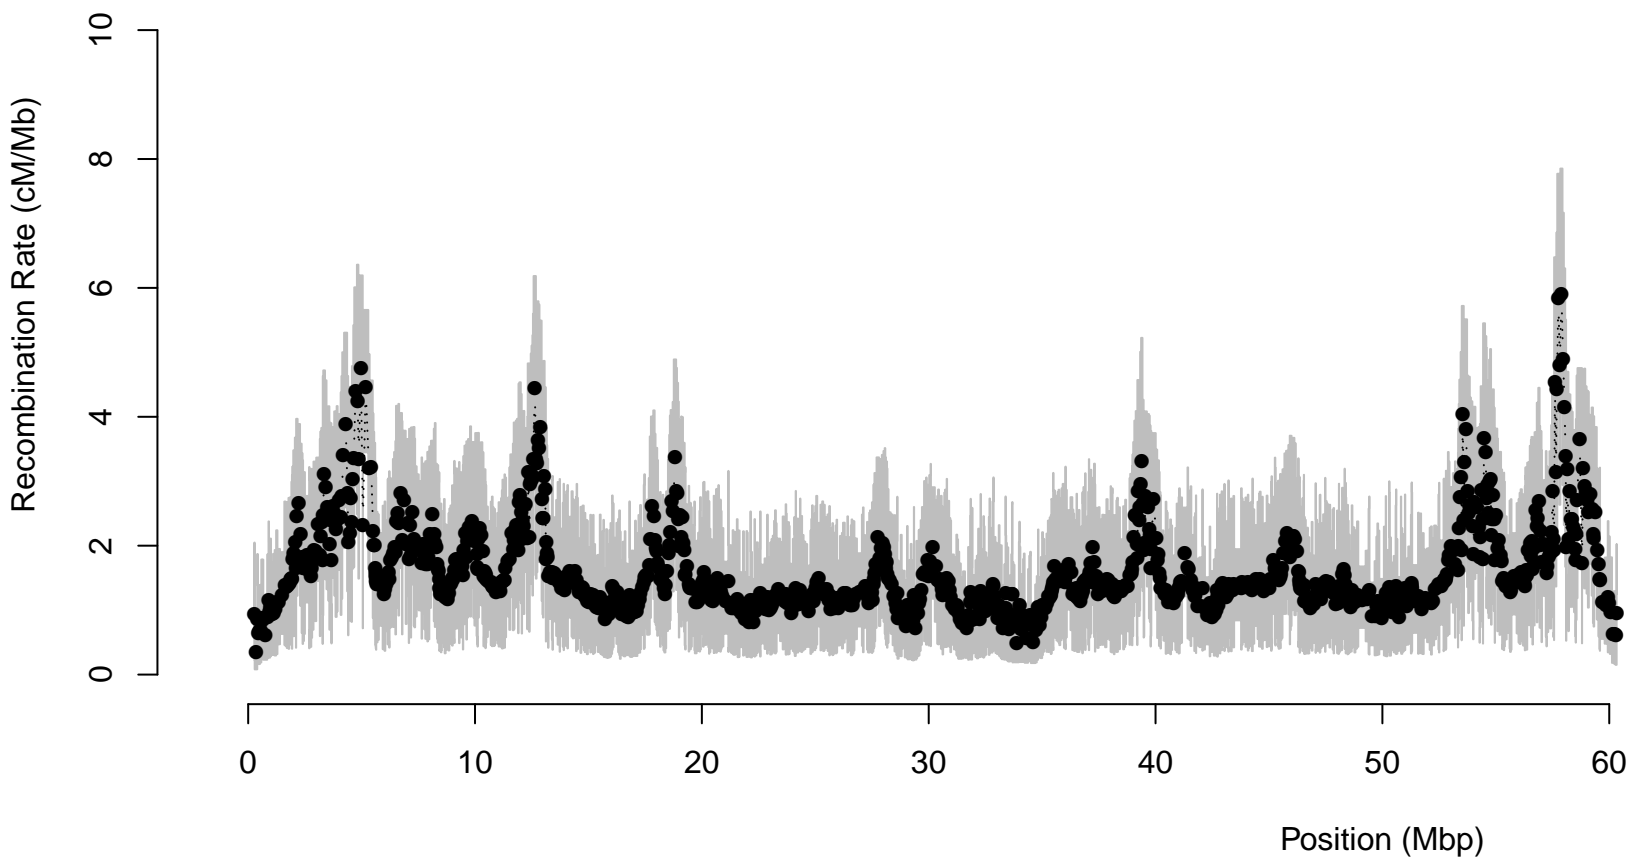

**Chromosome 20 1Mb Windows**

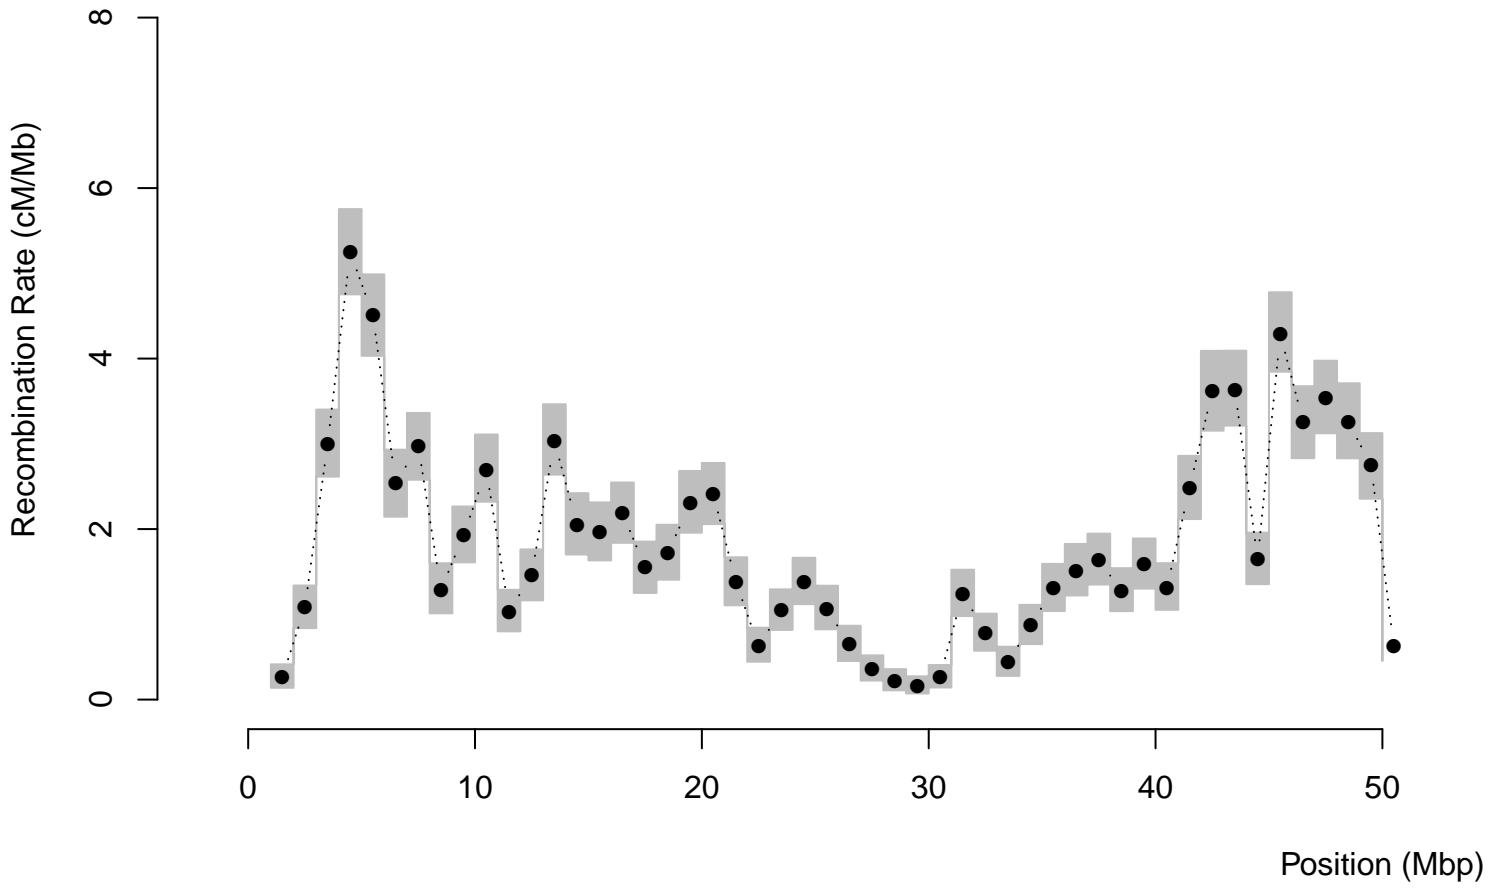

**Chromosome 20 SNP array**

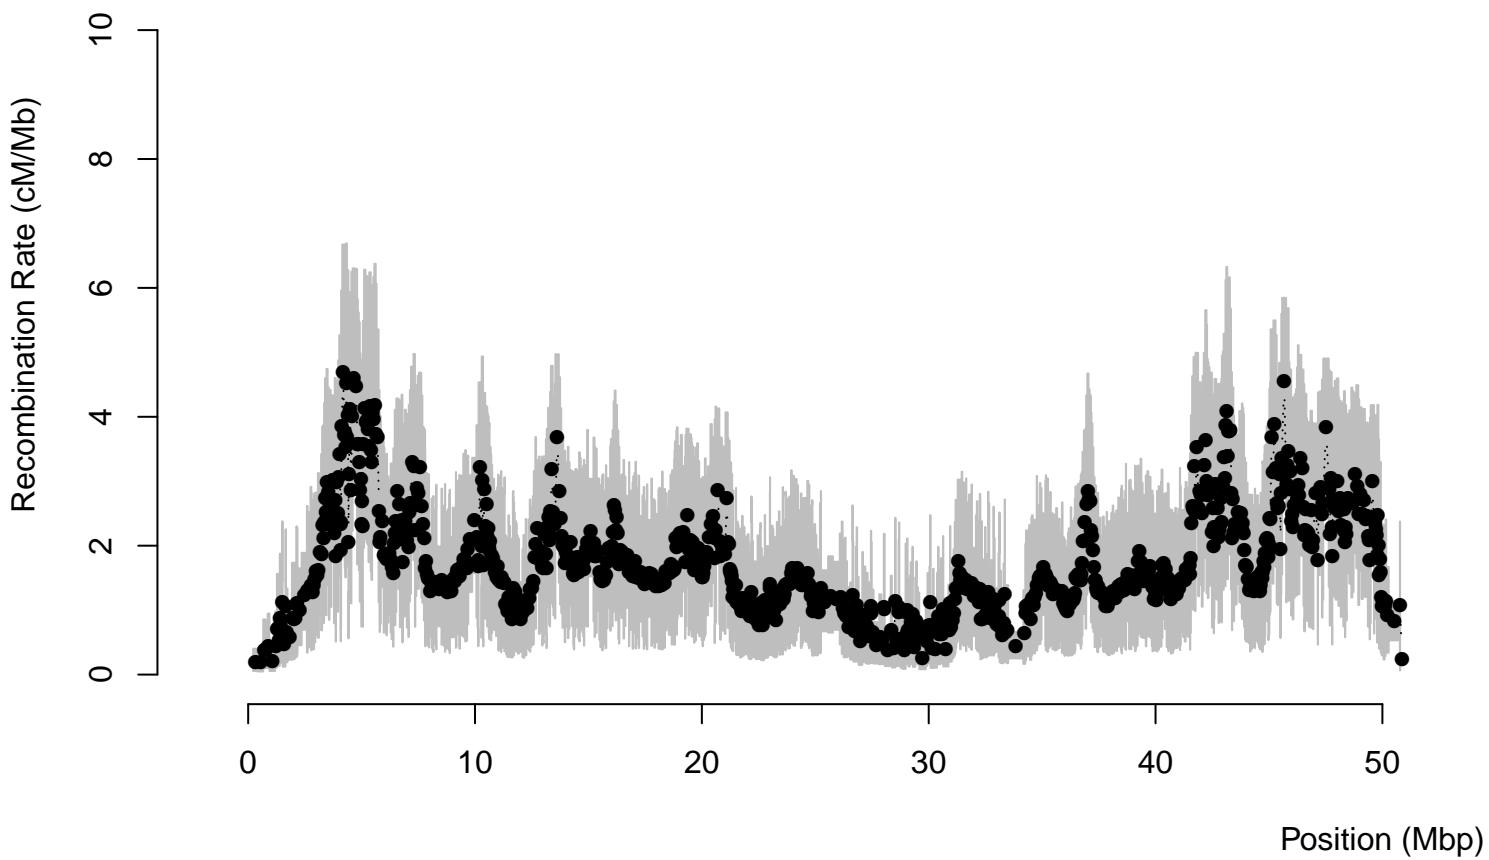

**Chromosome 21 1Mb Windows**

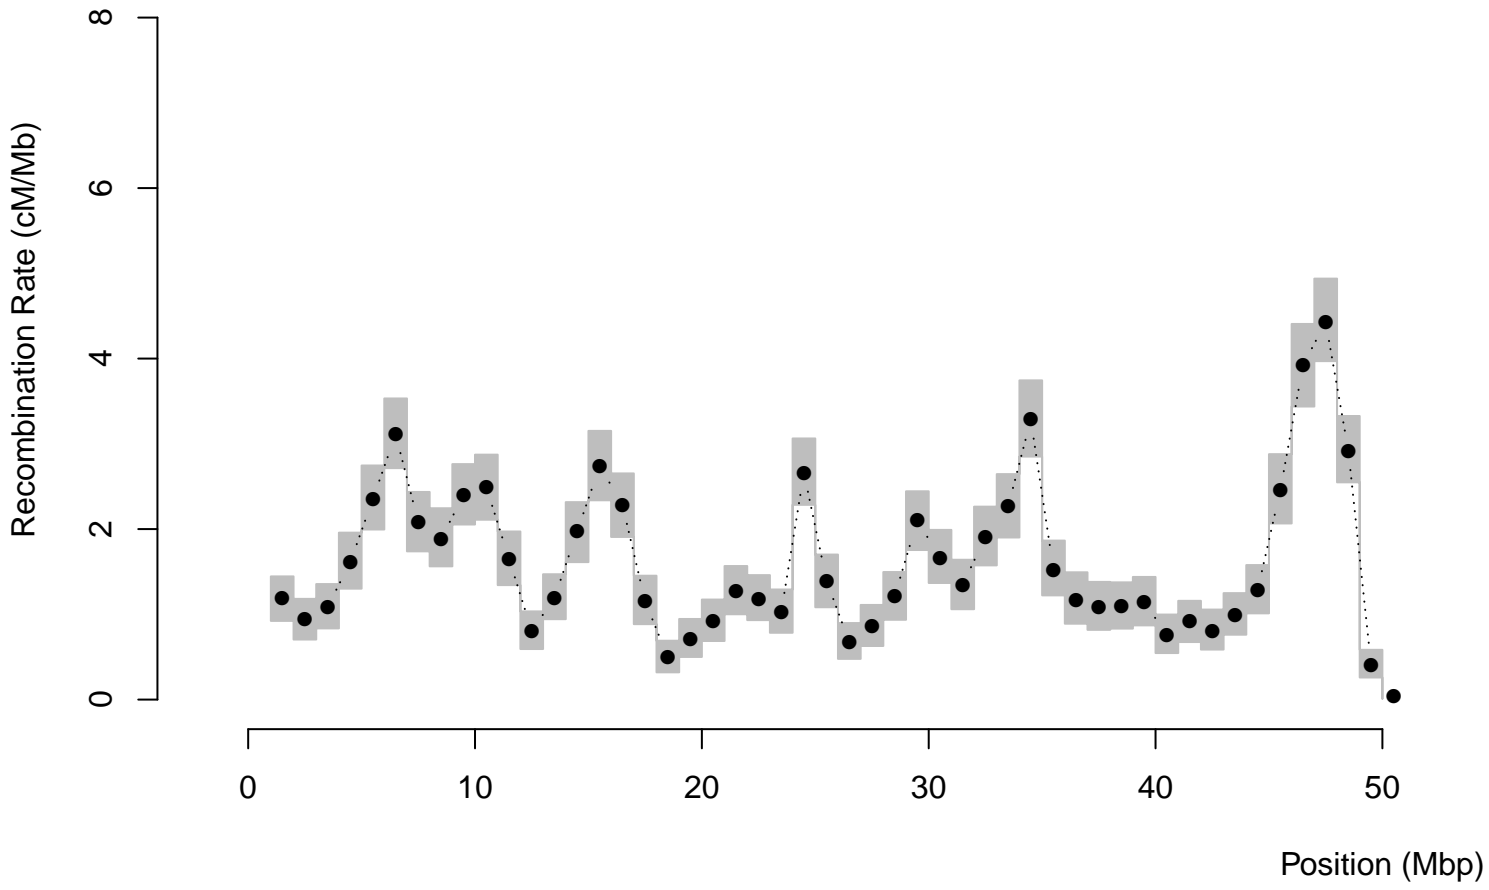

**Chromosome 21 SNP array**

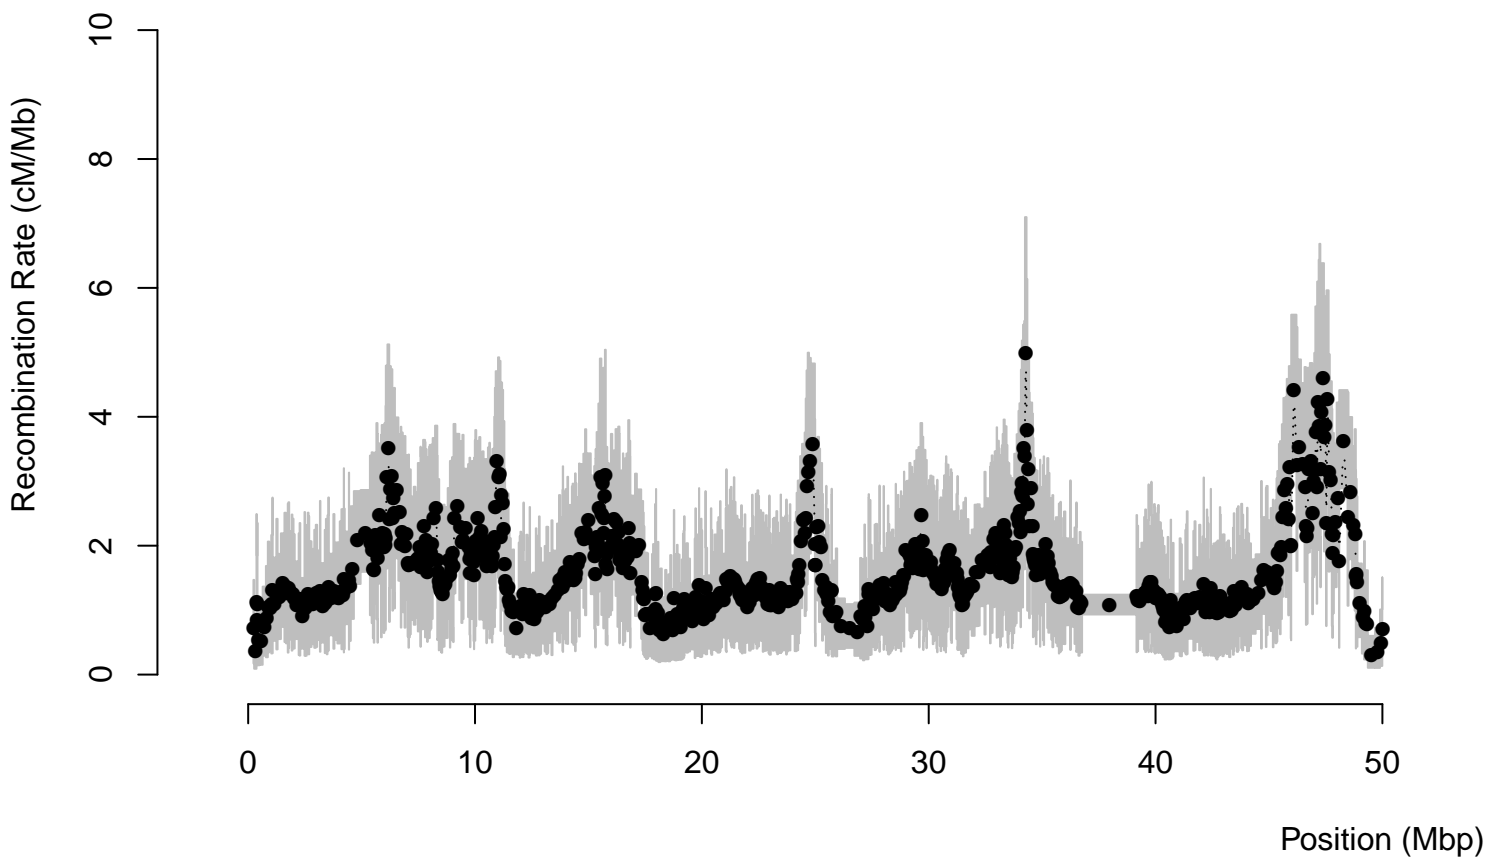

**Chromosome 22 1Mb Windows**

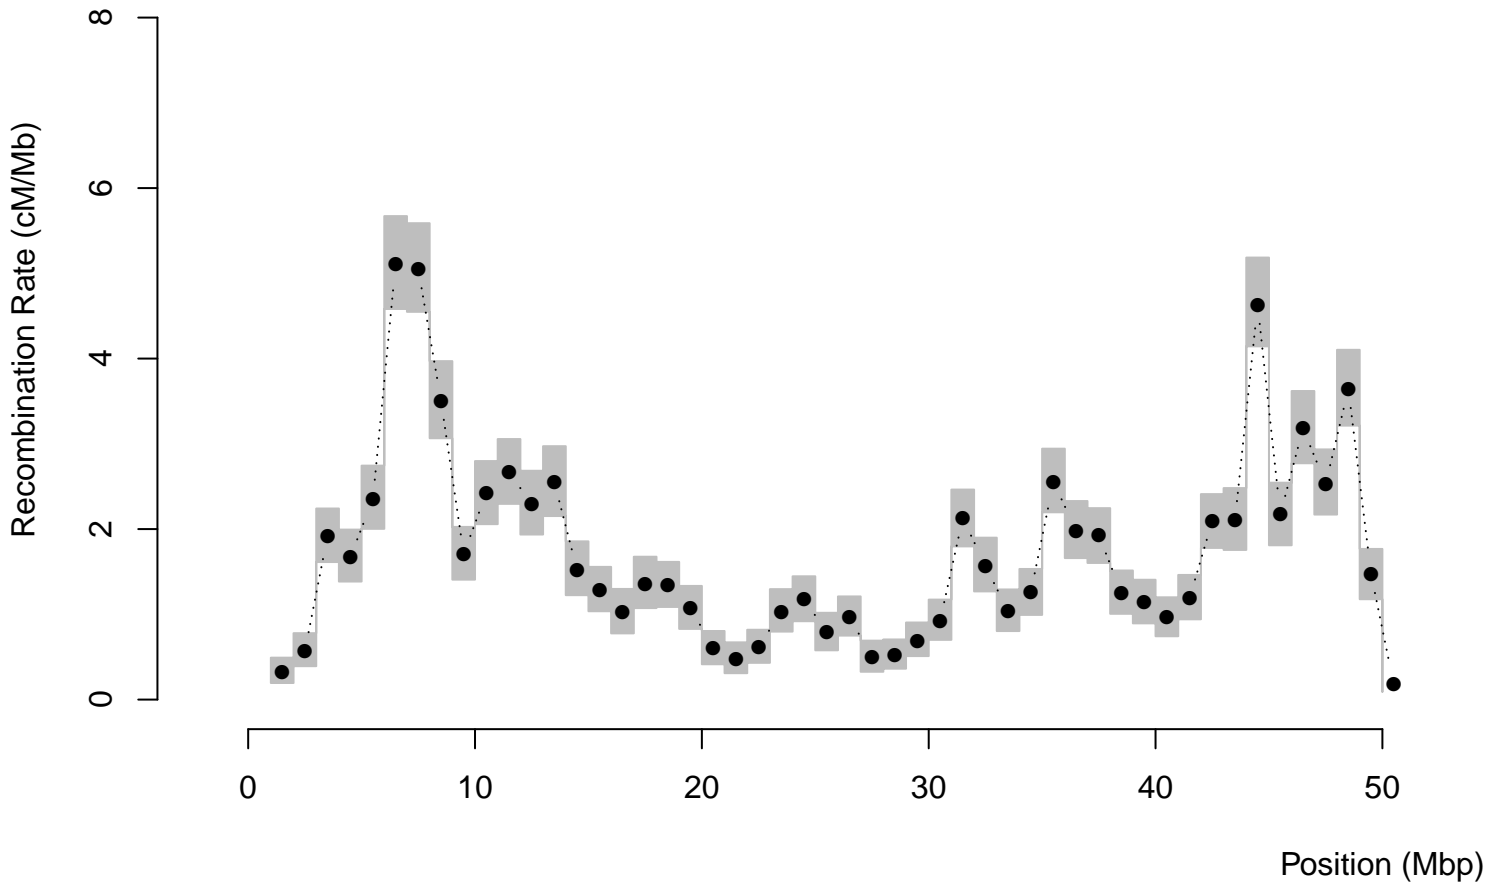

**Chromosome 22 SNP array**

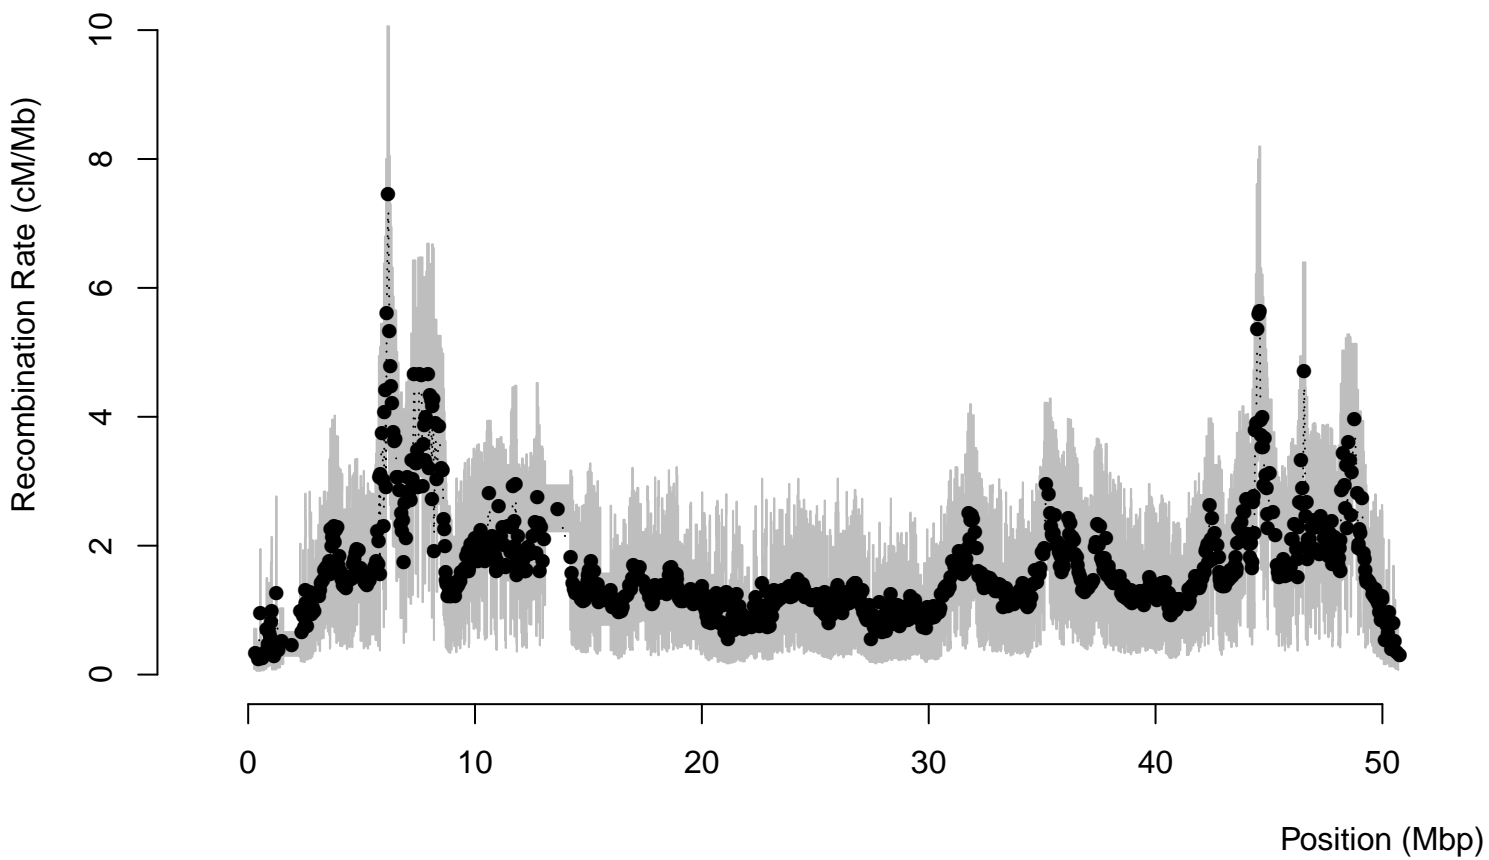

**Chromosome 23 1Mb Windows**

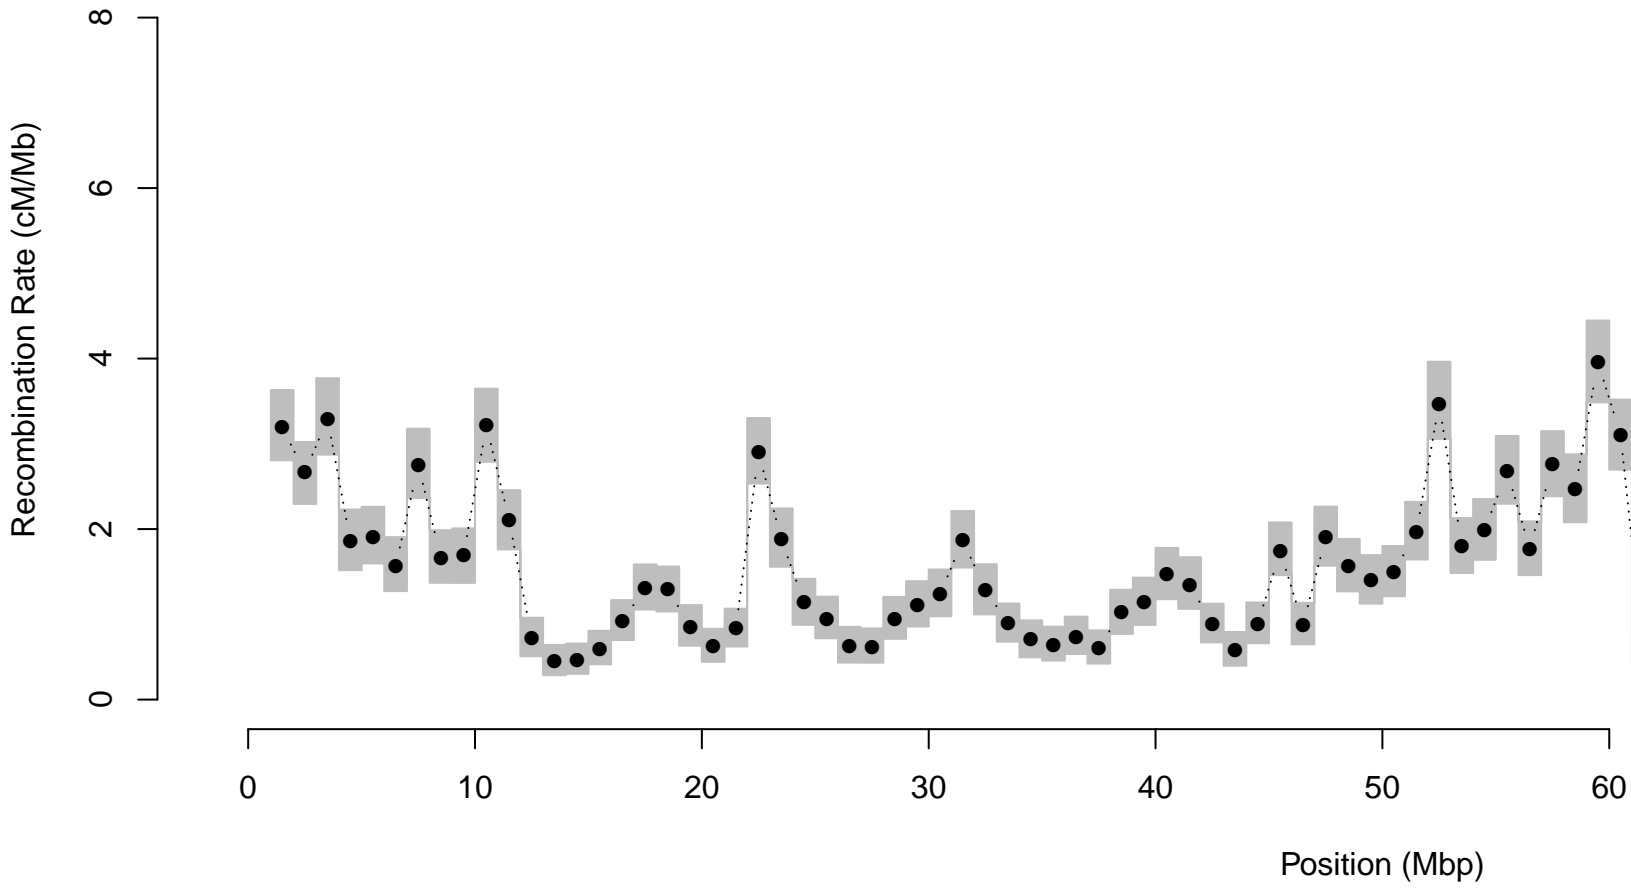

**Chromosome 23 SNP array**

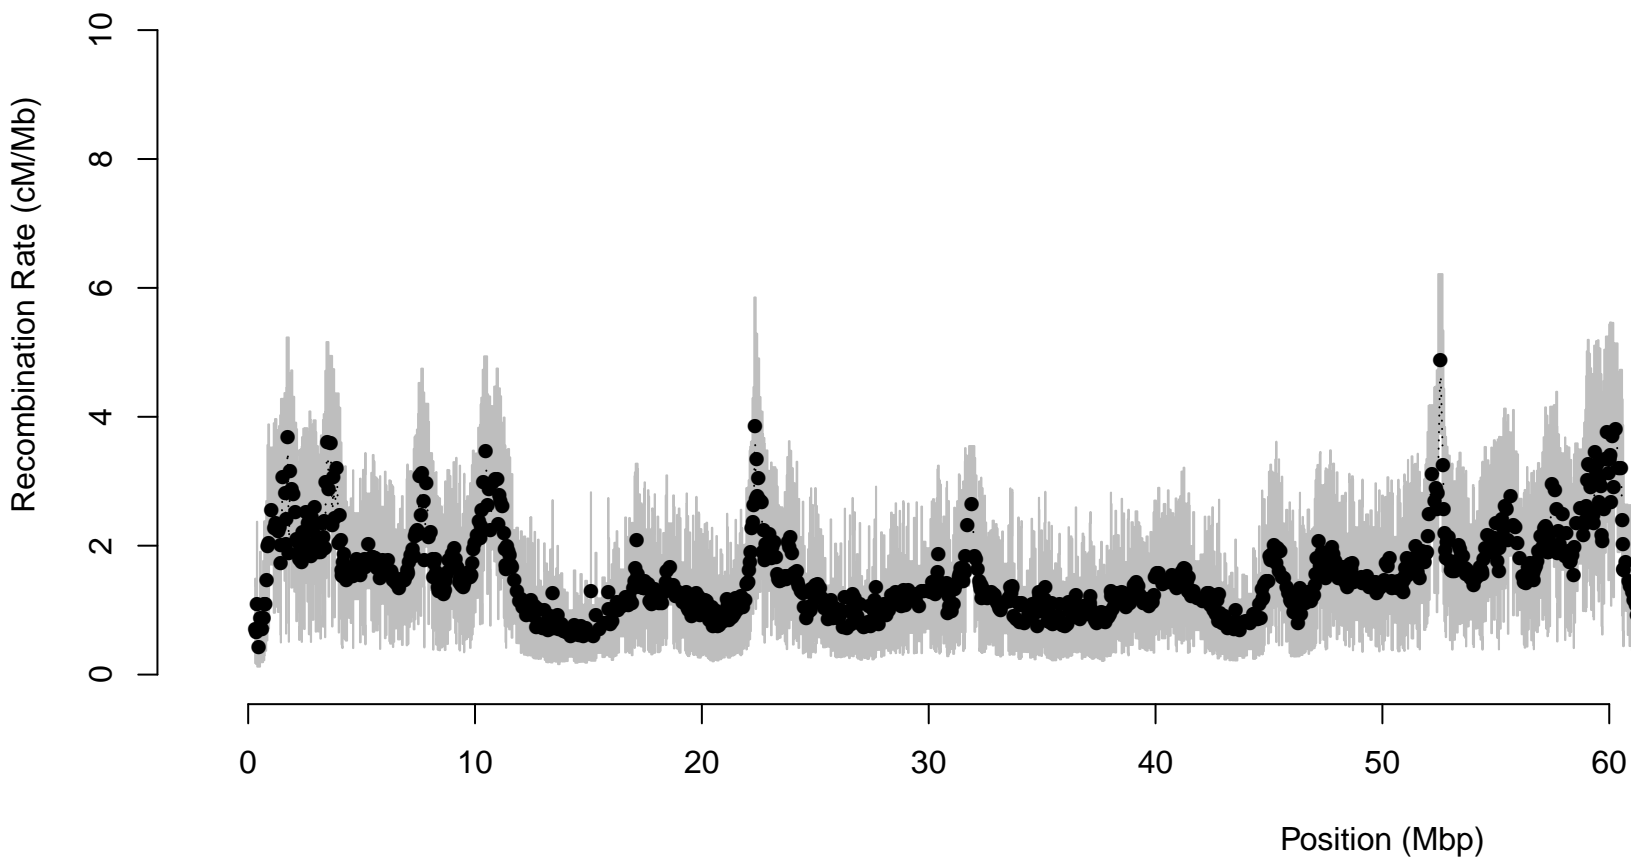



**Chromosome 24 1Mb Windows**

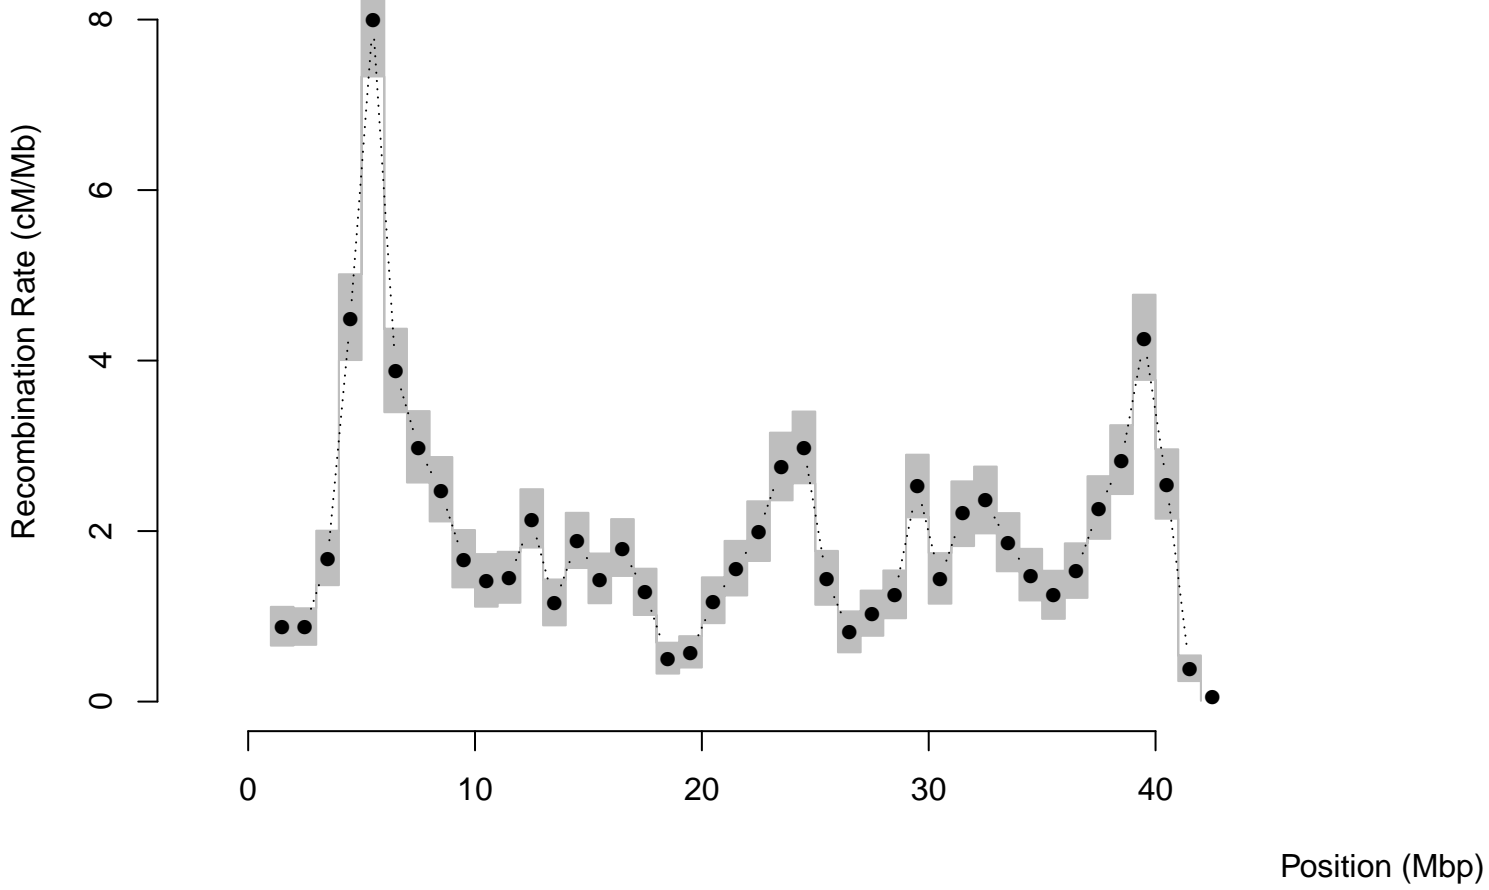

**Chromosome 24 SNP array**

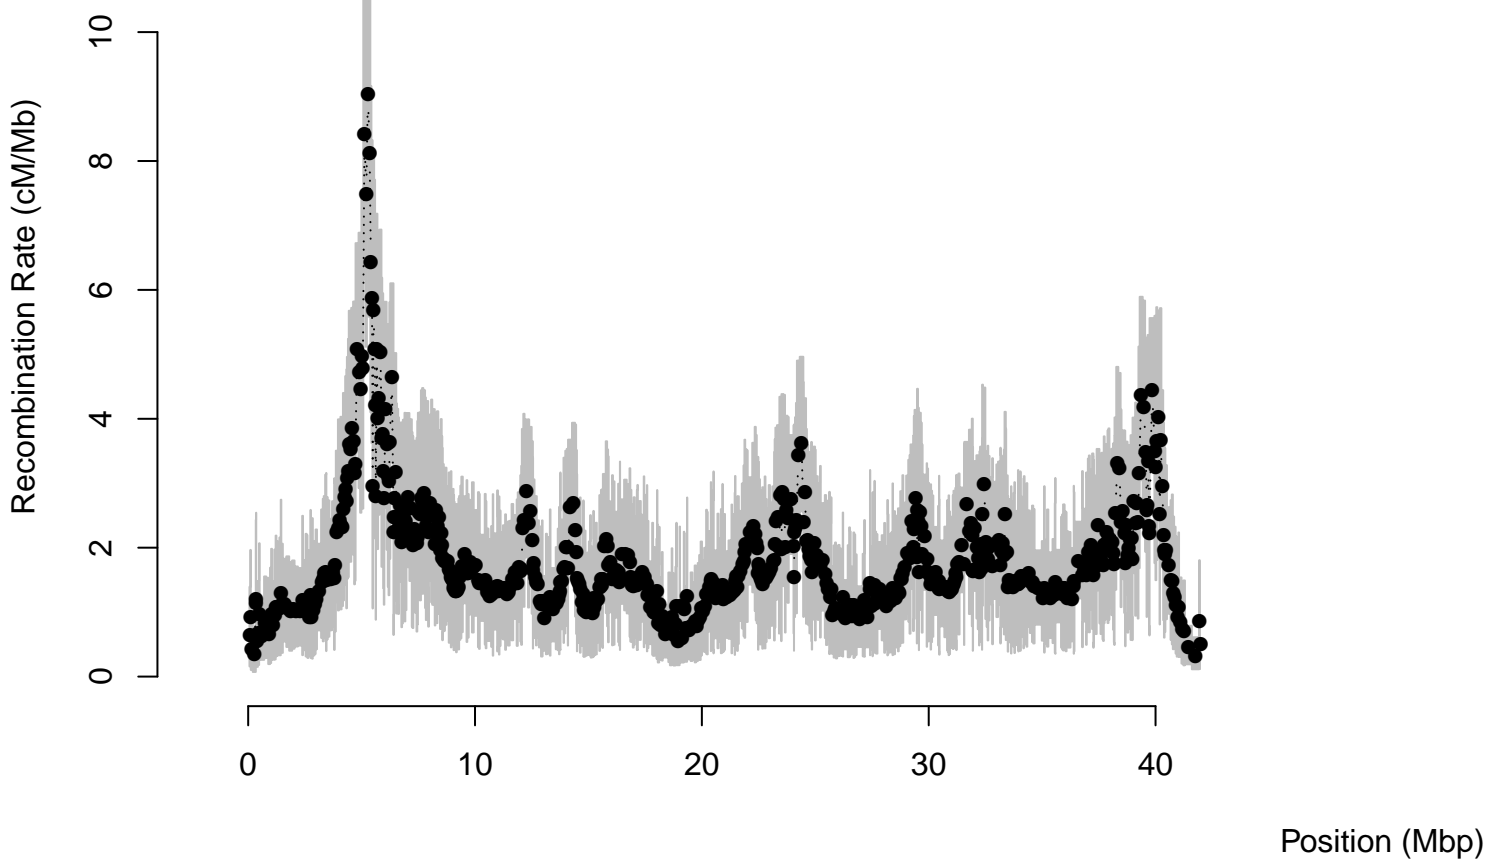

**Chromosome 25 1Mb Windows**

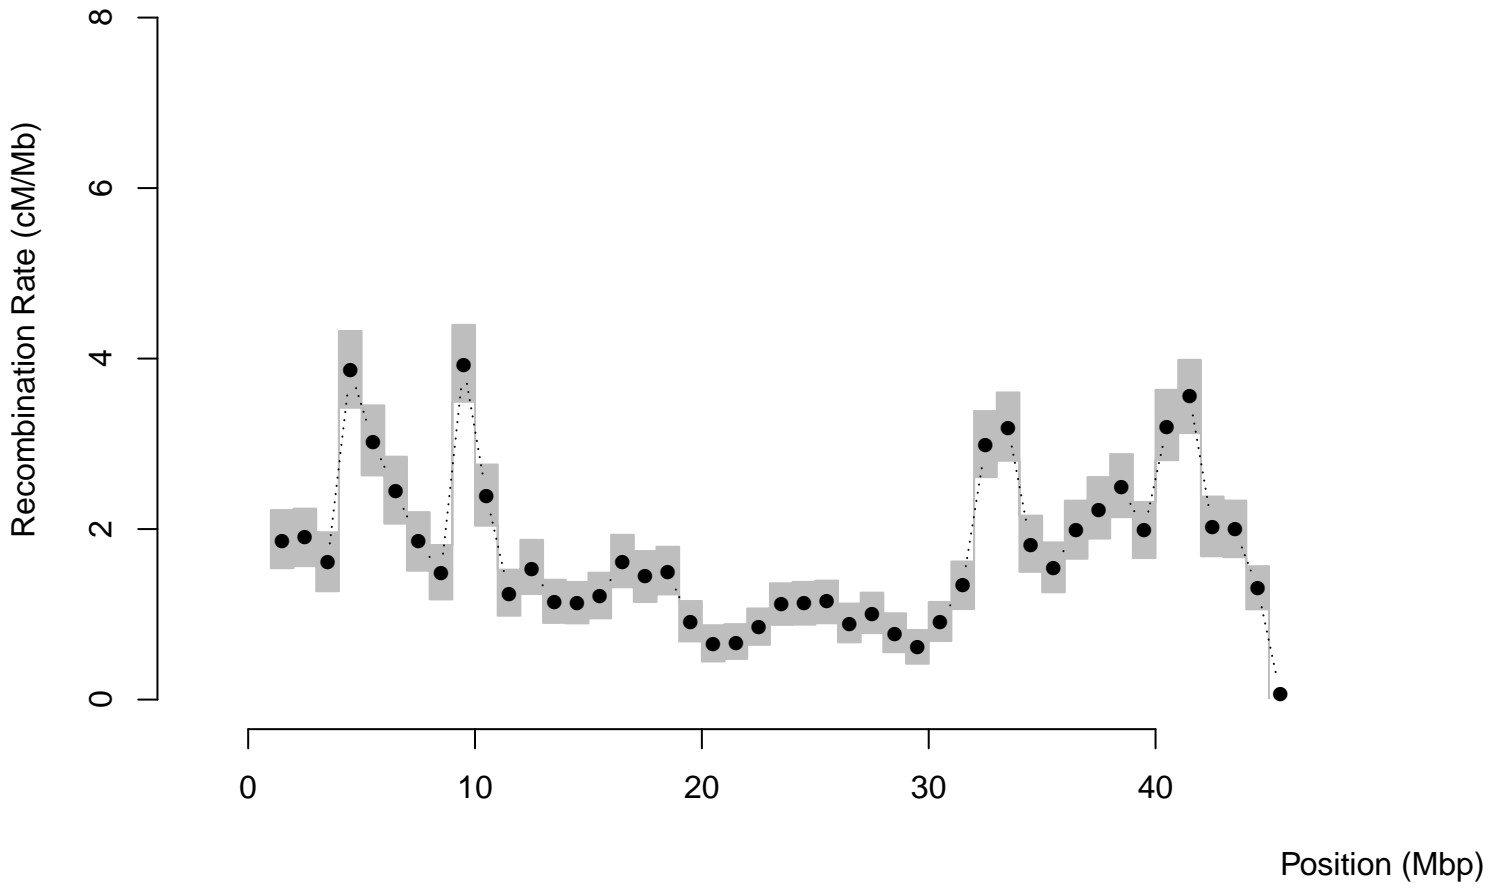

**Chromosome 25 SNP array**

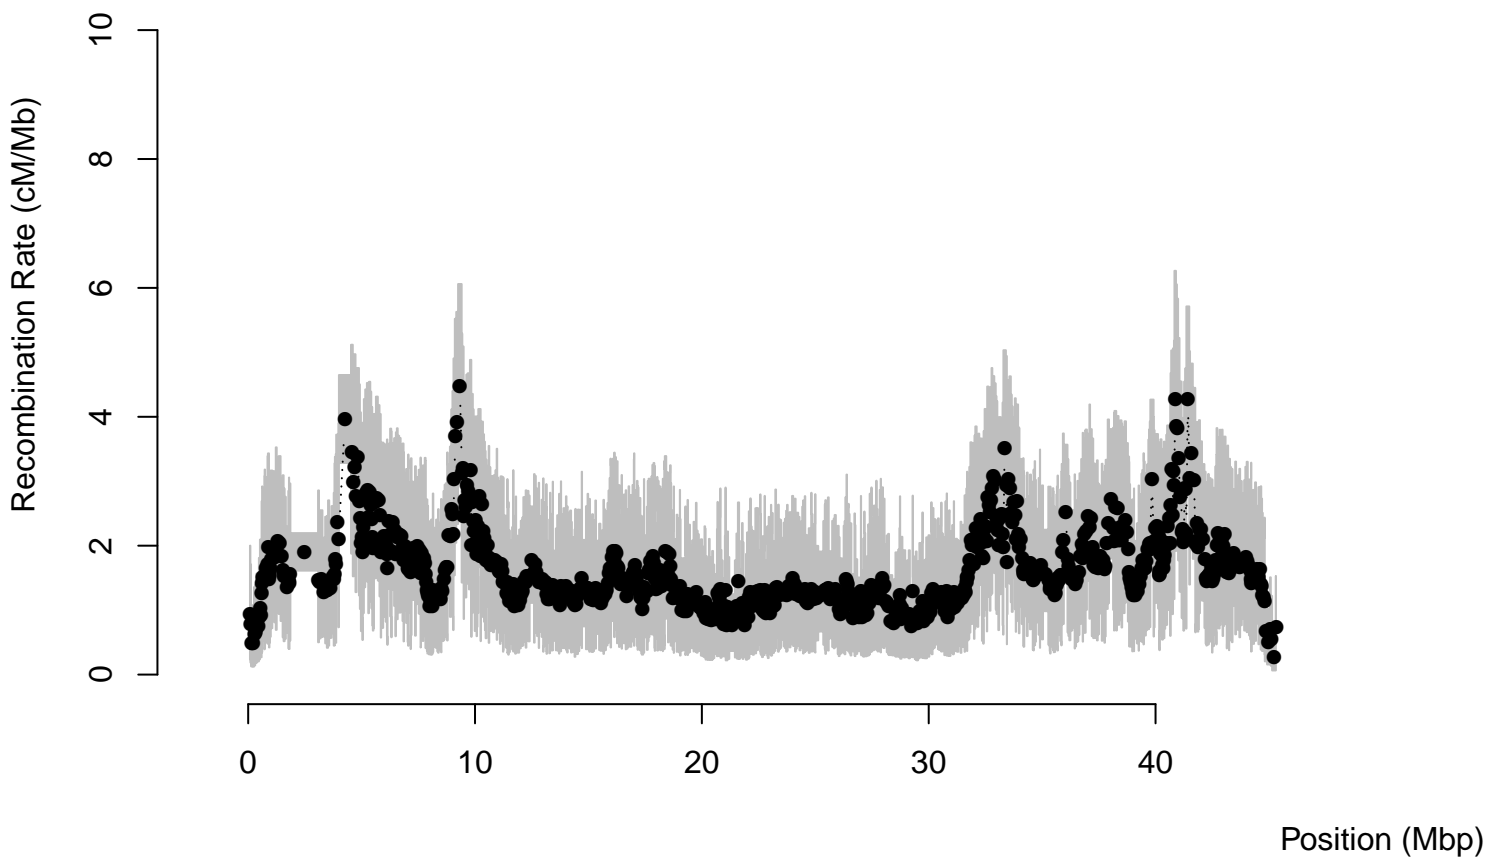

**Chromosome 26 1Mb Windows**

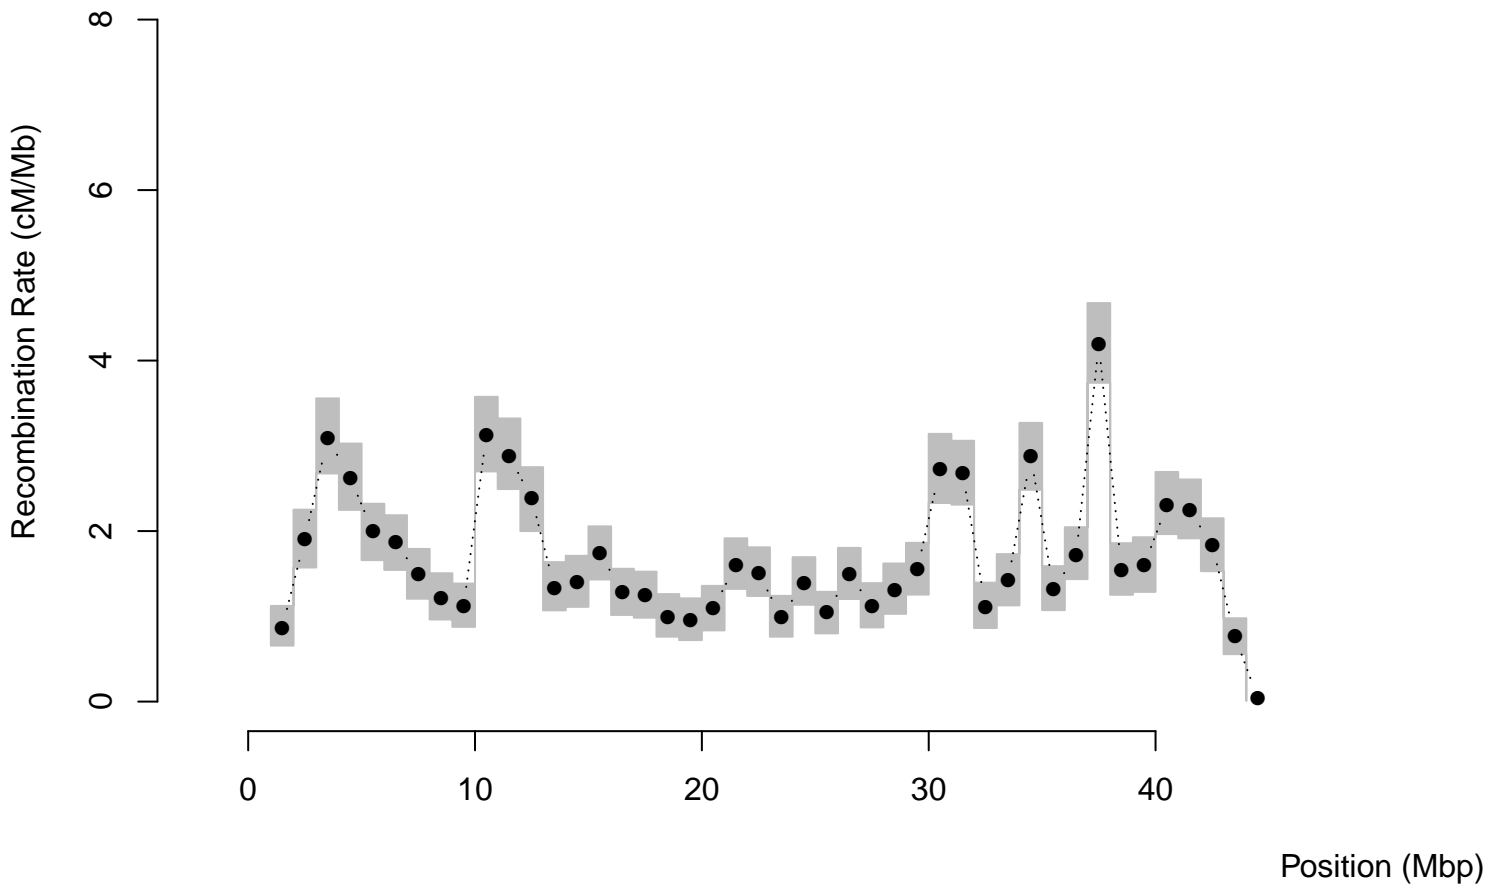

**Chromosome 26 SNP array**

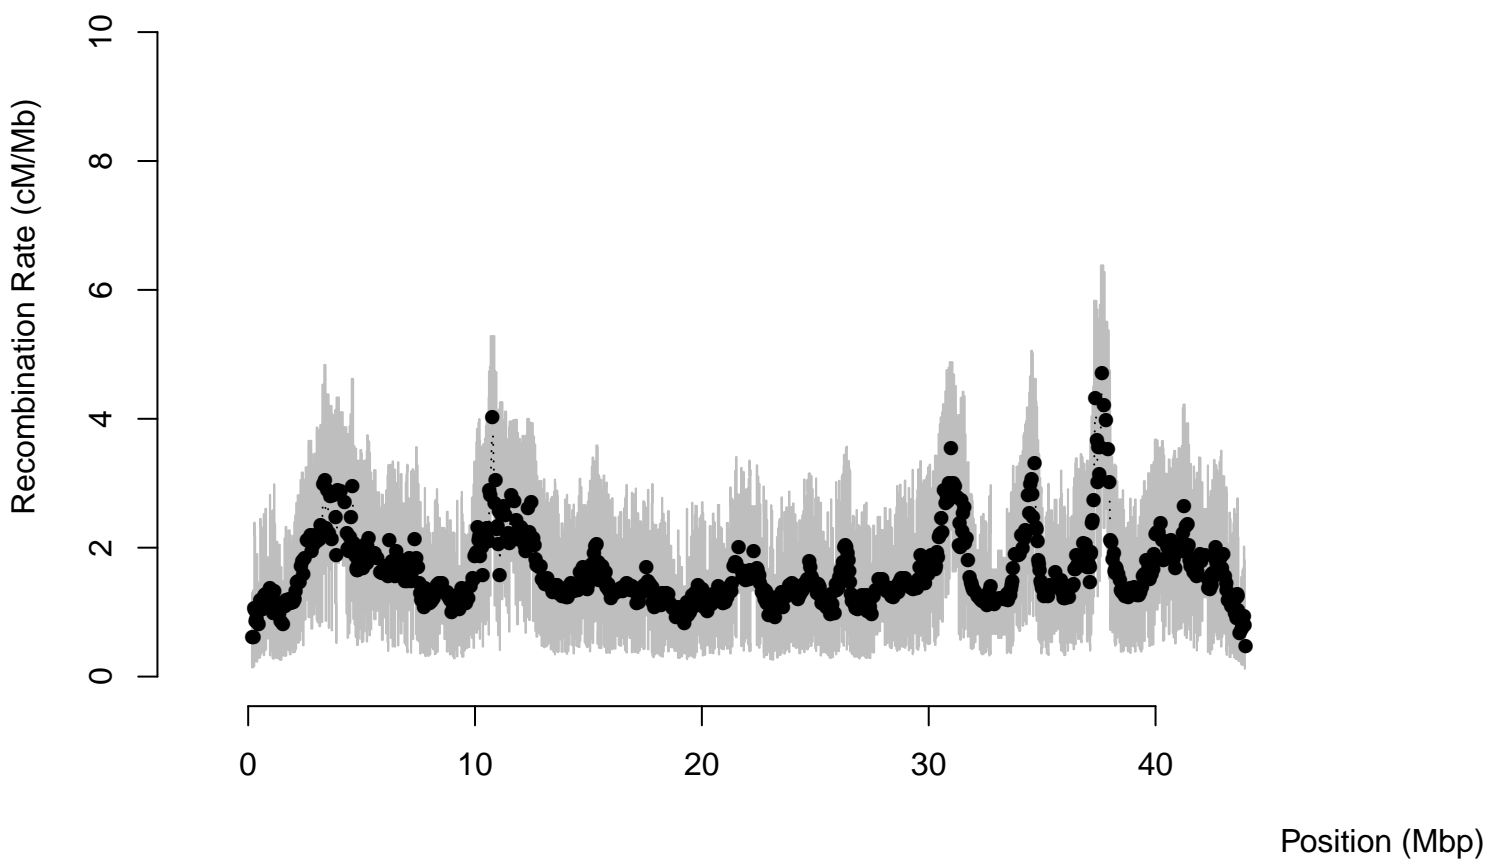

Supplement: 767FileS3.pdf [file 767FileS3.pdf]
