# Supplementary material
Source: PubMed Central journal article supplement (PMC5629338)
Supplement: 767FileS11.pdf [file 767FileS11.pdf]

# Supplementary Figures

**Figure S1. Genomewide distribution of recombination rate using the approach of Sandor et al. (2012).** These estimates were calculated from observed crossover frequencies. Fitting a gamma distribution on the observed estimates (red line) provided a prior distribution for the subsequent Bayesian inference on recombination rates (parameters given in the box). See methods for details.

**Figure S2. Distribution of recombination intensities among intervals of the HD SNP array.** The green curve represents the distribution under the null hypothesis that there is no hotspots ( $\log_{10}(\lambda_i) = 0$ ). It is estimated by fitting a mixture of Gaussian distribution to the observed distribution and extracting the relevant component. Intervals where recombination intensity was particularly high (FDR = 5%) were considered as harbouring recombination hotspots and are shown in red.

**Figure S3. Validation of imputed genotypes for the GWAS.** The figure shows the proportion of correct genotype calls as a function of their posterior probability calculated with BIMBAM.

**Figure S4. *RNF212* gene structure in various species.** *RNF212* gene is not annotated on the ovine reference genome Oar\_v3.1, but can be located at the telomeric end of OAR6 (116,4Mb) by homologies (dashed lines) with the *RNF212* gene from *Ovis aries musinon* (Oor1\_1.0). Some annotated predicted non-coding RNA sequence (nc\_RNA in brown) were part of the *RNF212* sequence. The ovine *RNF212* gene is also partly present in the unplaced scaffold005259, that can be virtually located in the largest assembly gap (in blue). In *Ovis orientalis musimon*, the *RNF212* gene exhibited 14 putative exons with alternative splicing (mRNA models in green). Homology analysis (dashed lines) with annotated *RNF212* gene in other ruminant species (bovine on BTA6 and caprine on CHI6) indicated a good gene structure conservation between ovine and bovine *RNF212*, but only a partial conservation with goat *RNF212*, where the six last predicted exons match with intronic region in ovine. When compared to human *RNF212* on HSA4 and mouse *RNF212* on MMU5 chromosomes, only four to five exons are conserved with ruminants indicated a non-conserved gene structure. Red lines located SNP associated with global recombination rate (GRR) in the present study, and those previously shown in bovine (Sandor et al. 2012; Kadri et al. 2016), in human (Kong et al. 2008; Chowdhury et al. 2009; Fledel-Alon et al. 2011; Kong et al. 2014) and in mouse (Fujiwara et al. 2014). Gene scales are in base pair and gene structures were constructed with CLC Main Workbench software v7.7.3 using the NCBI query module (Qiagen Aarhus).

**Figure S5. Patterns of recombination along Sheep autosomes.** Left: recombination rate of one megabase windows along metacentric chromosomes (1,2,3). Center: recombination rate of one megabase windows along acrocentric chromosomes (4-26). Right: recombination rate of one megabase windows against distance to nearest chromosome end.

**Figure S6. Recombination rates of Sheep autosomes.** Left: from recombination rate estimates in windows of one megabase. Right: from recombination rate estimates in SNP

array intervals. Top: for each chromosome. Bottom: as a function of chromosome physical size. Dotted line:  $c = f(\log(\text{size}))$ , dashed line:  $c = f(1/\text{size})$ .

**Figure S7. Distribution of recombination on the genome.** The figure represents the proportion of the physical genome size affected by recombination, for increasing coverage of the genetic map. The Gini corresponding to the brown area on the figure is 0.52.

**Figure S8. Relative intensity of population to meiotic recombination rates in windows of 1 Mb along the sheep genome.**

**Figure S9. Posterior standard deviation of recombination rates on the medium density SNP array with different datasets.** Soay: dataset from Johnston et al. (2016), only male meioses were used. Lacaune: dataset from this study. Both: combination of the two datasets.

**Figure S10. Effect of insemination month on the average number of crossovers per meiosis.** Top: estimated mean GRR (dots) and 95% confidence intervals (vertical lines). Bottom: number of inseminations per month.

**Figure S11. Individual variation in recombination rates among Lacaune Males.** Additive genetic values on Genome-wide Recombination Rate genetic for all Lacaune sires of our dataset (in black) and for the 345 FID (in grey). The vertical black line is placed at the mean.

**Figure S12. Local alignments of the Sheep and Human genome around the OAR7 QTL region.** Dotplot of the alignments of sheep OAR7 on human HSA14. Vertical cyan bars are located at significant SNP positions. Three functional candidate genes surrounding the association signal (shaded) are indicated.

**Figure S13. Linkage disequilibrium between *RNF212* polymorphisms and chromosome 6 QTL SNPs.** The top figure represents the mRNA and the protein of *RNF212*. The four genotyped mutations are indicated : the two first are intronic and the two others are exonic. We replace the gene on a zoom on the chromosome 6 QTL (middle figure). The four left solid lines highlight the mutations, whereas the dashed lines represent the 3 most significant SNPs. Middle points show the intermediate SNPs between the mutations and the significant SNPs. Finally, the figure at the bottom indicates the pairwise LD between the mutations and all the SNPs presented on the middle figure. It highlights two haplotype blocks : one between the 3 most significant mutations and another between the 3 most significant SNPs.

Figure S1.

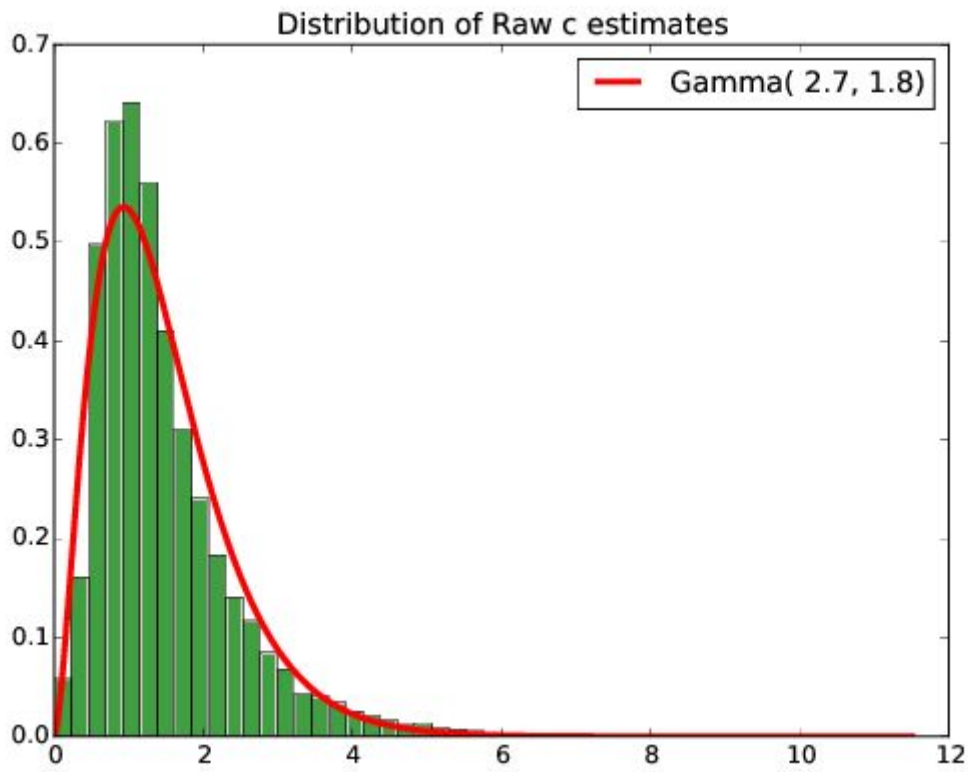

**Figure S2.**

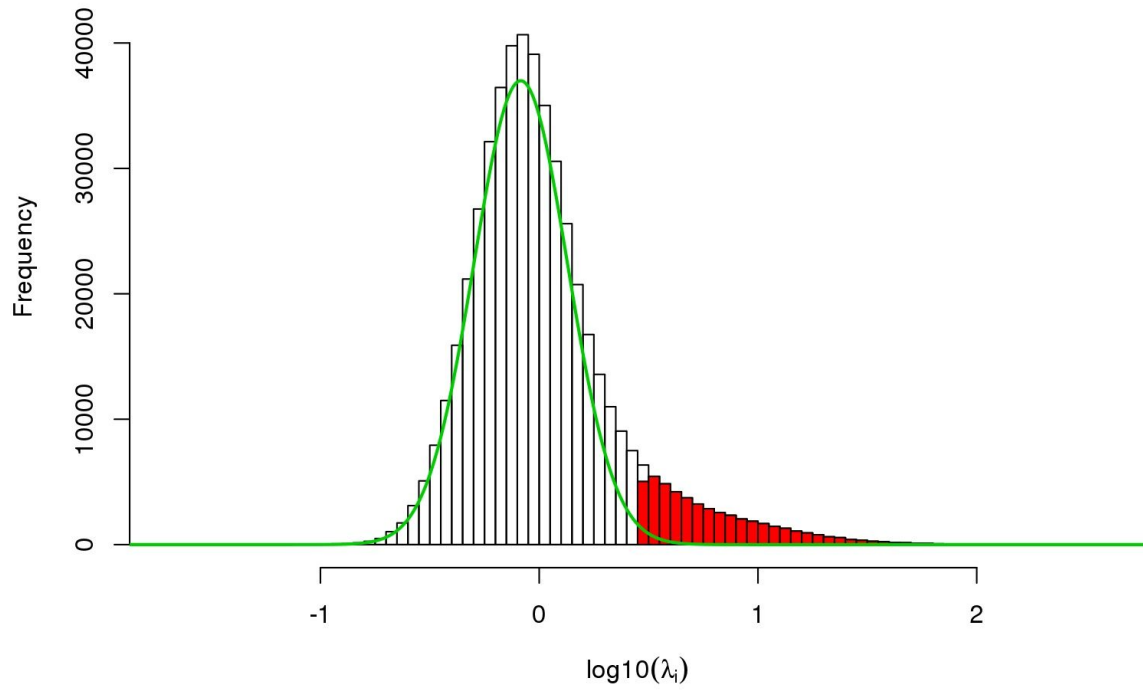

Figure S3.

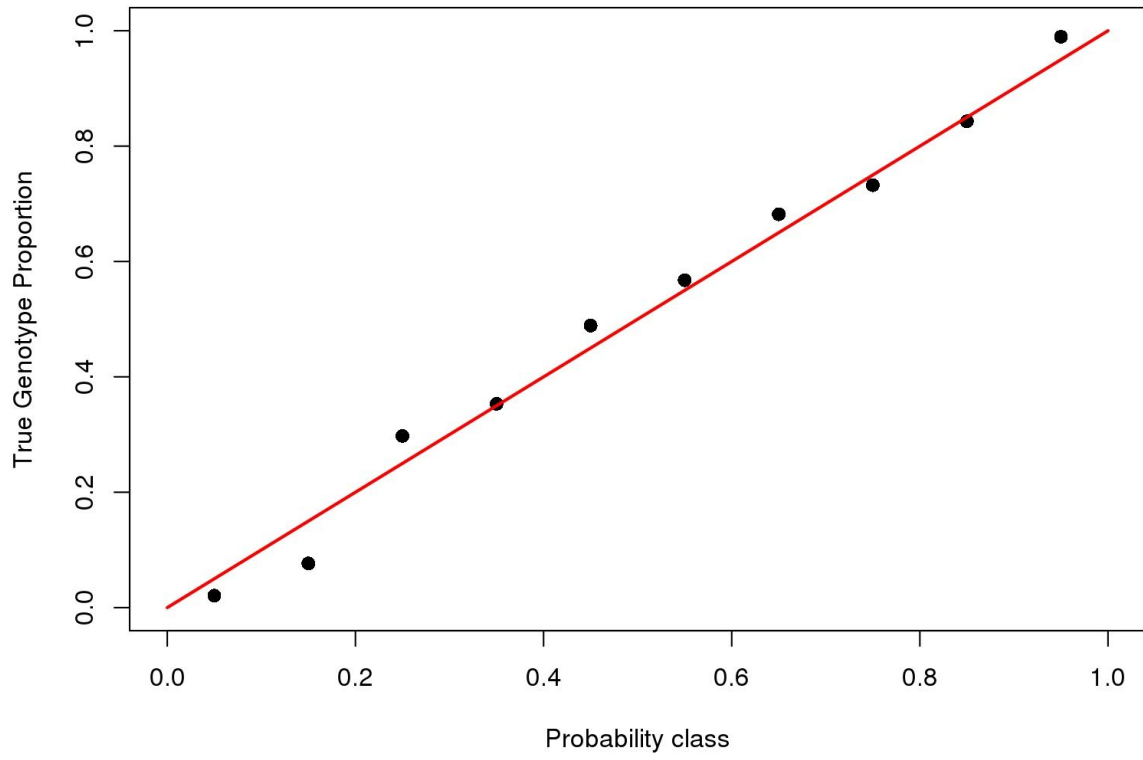

Figure S4.

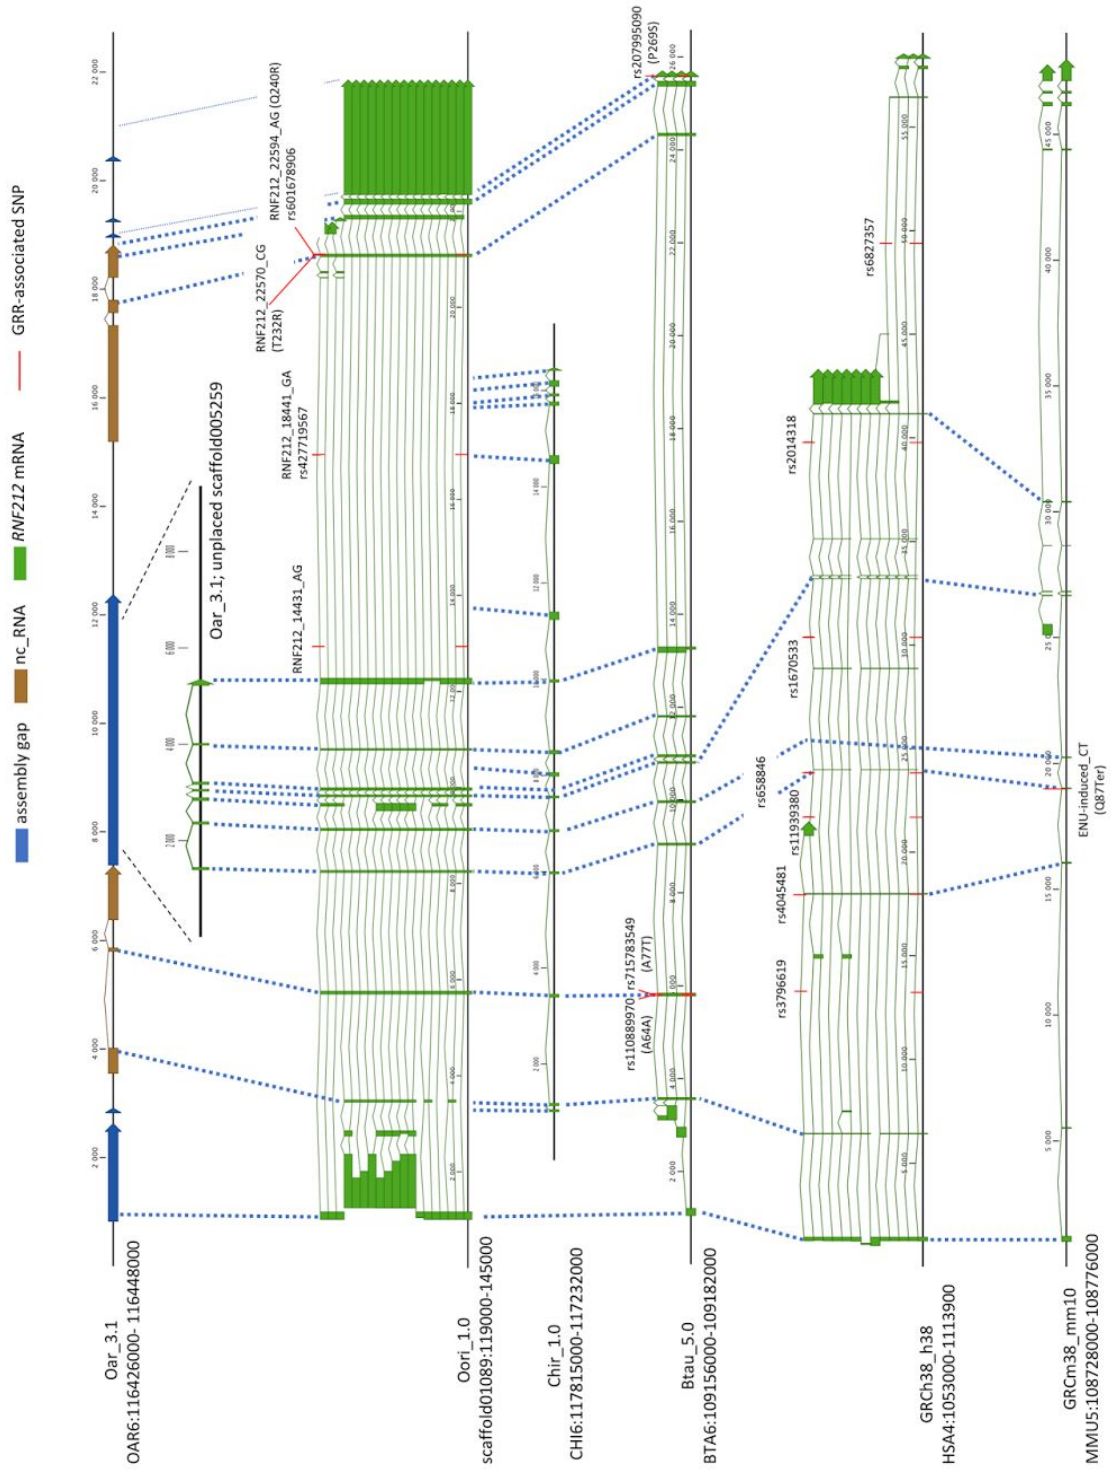

Figure S5.

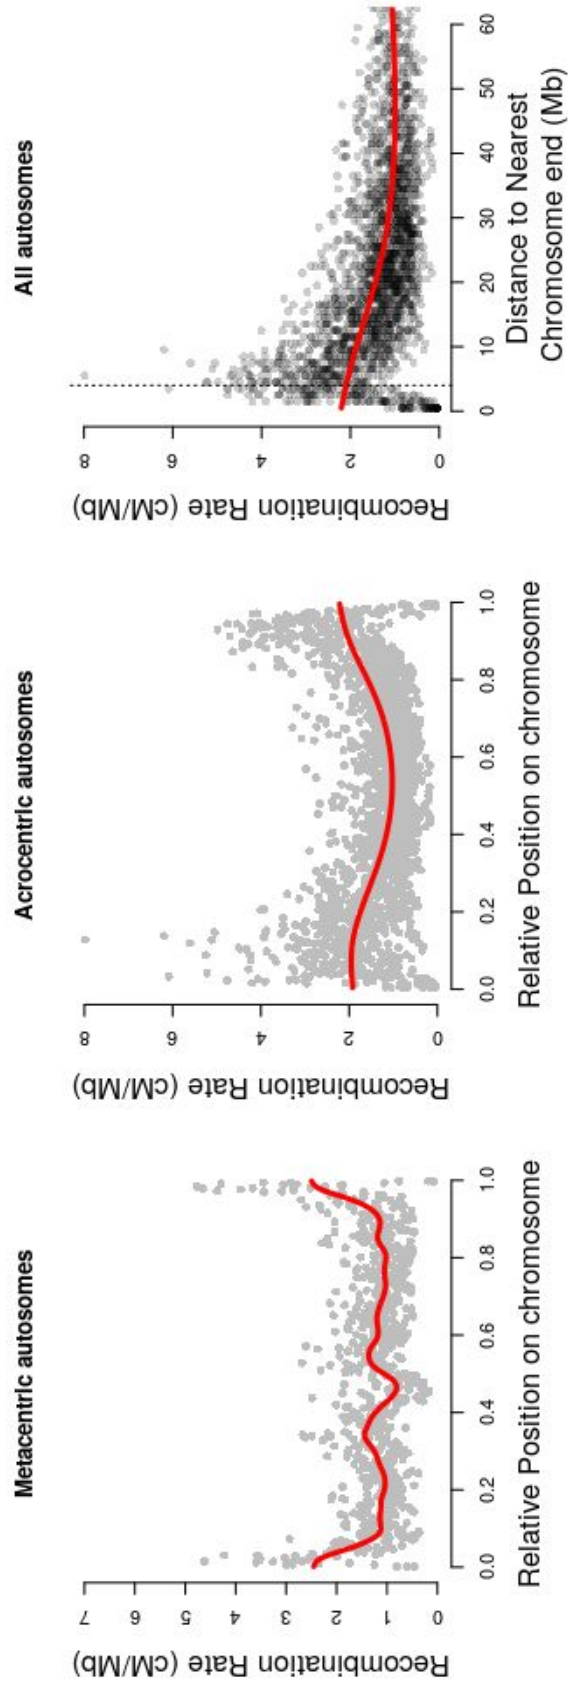

Figure S6.

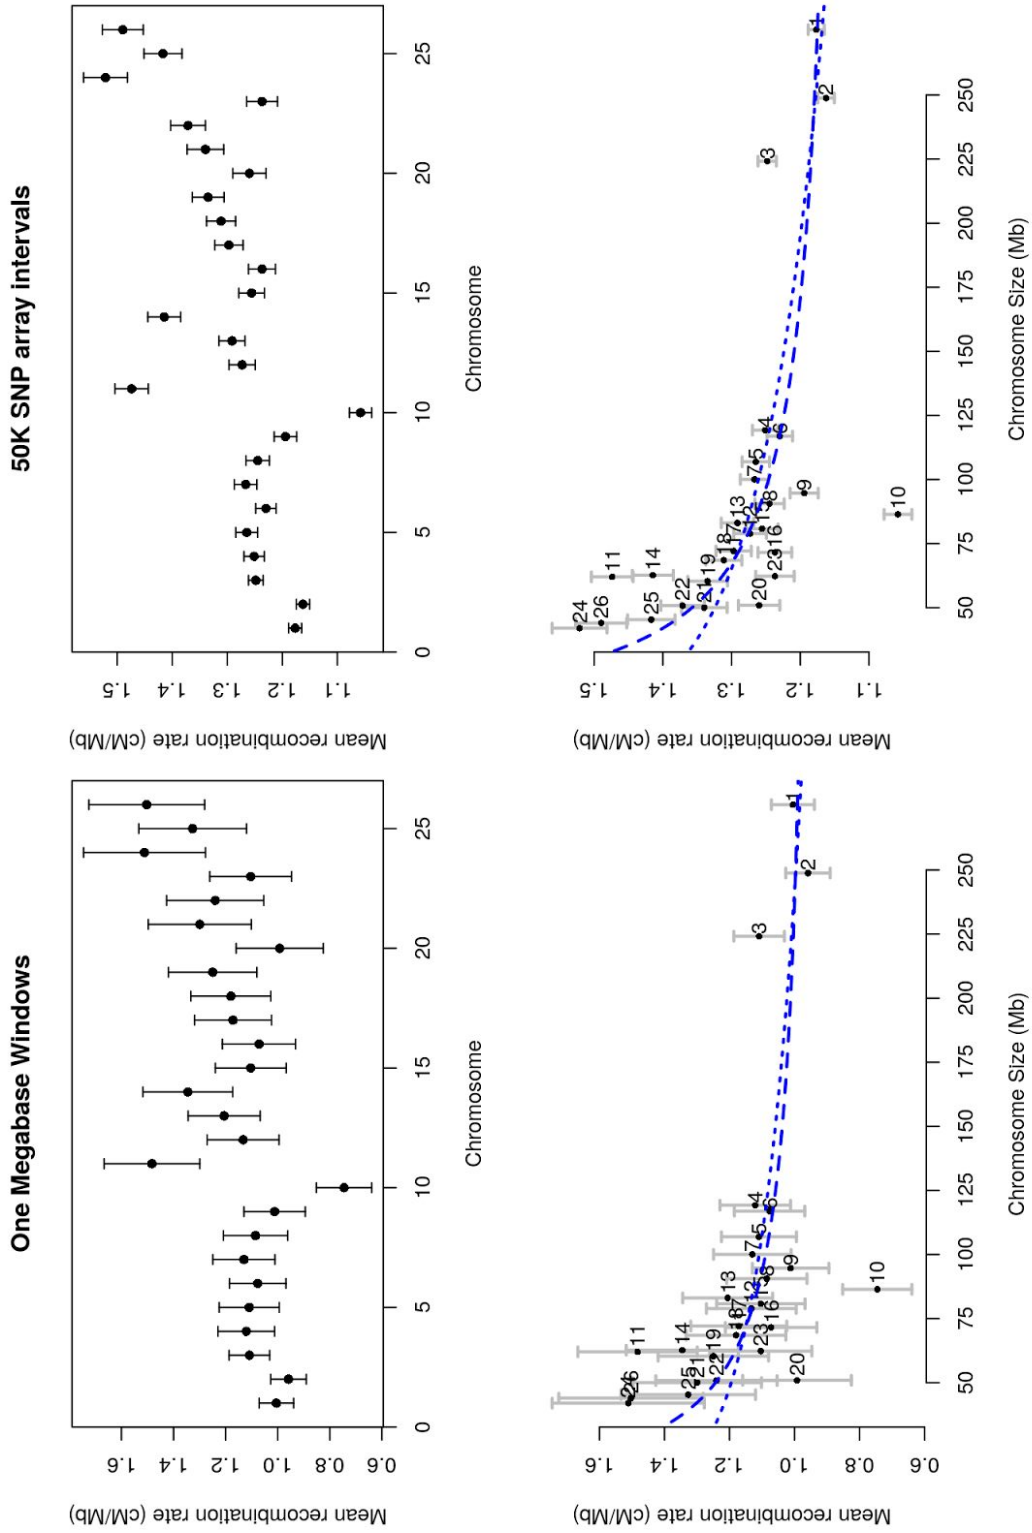



Figure S7.

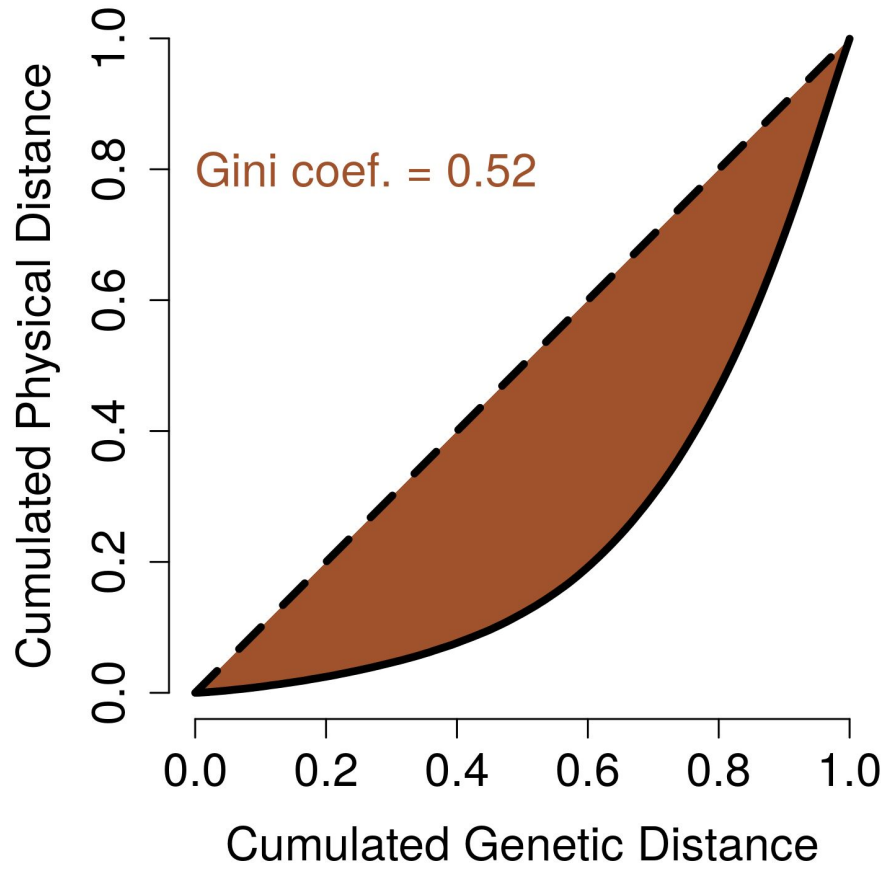

Figure S8.

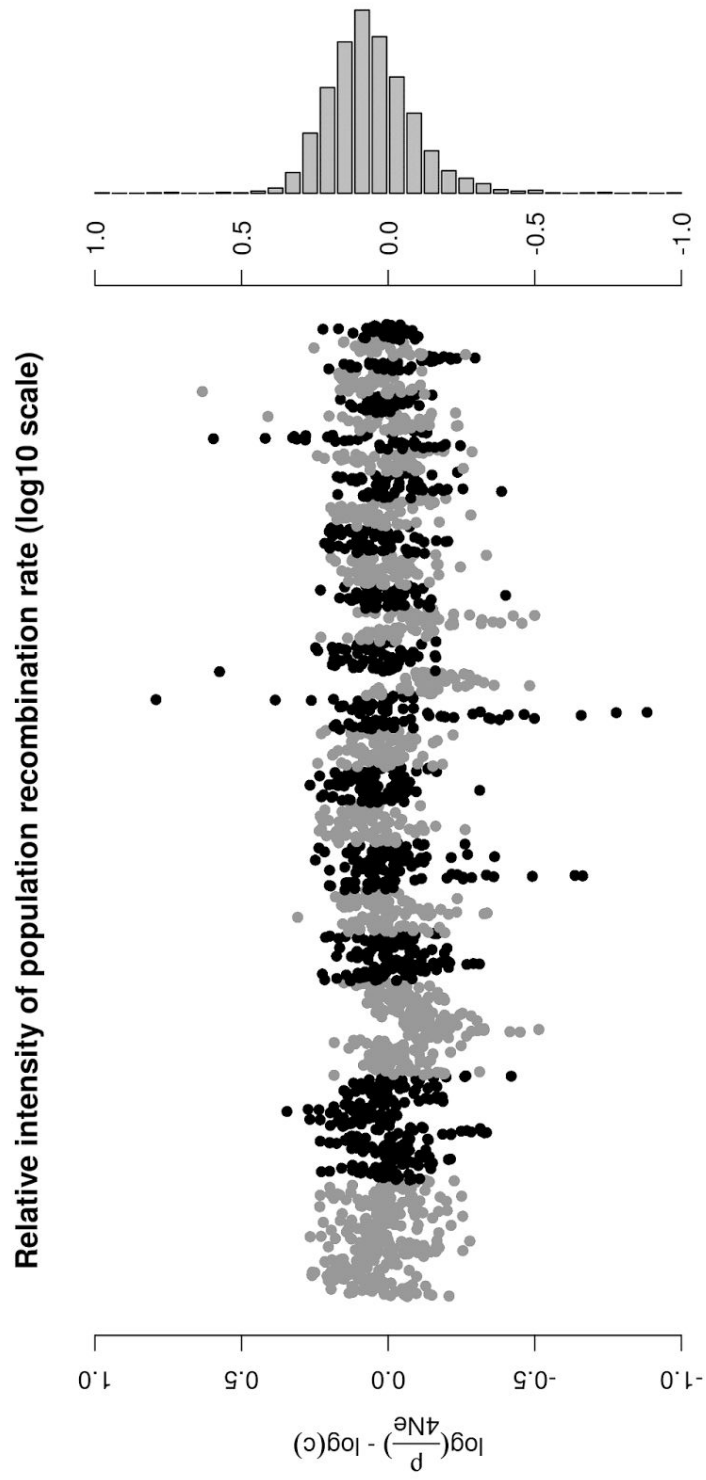

**Figure S9.**

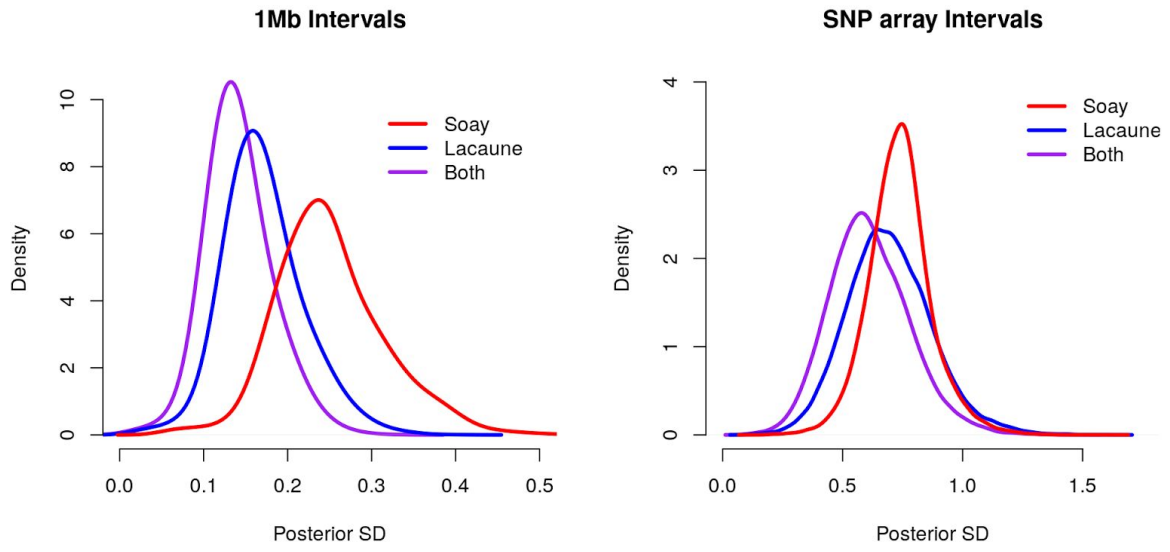

Figure S10.

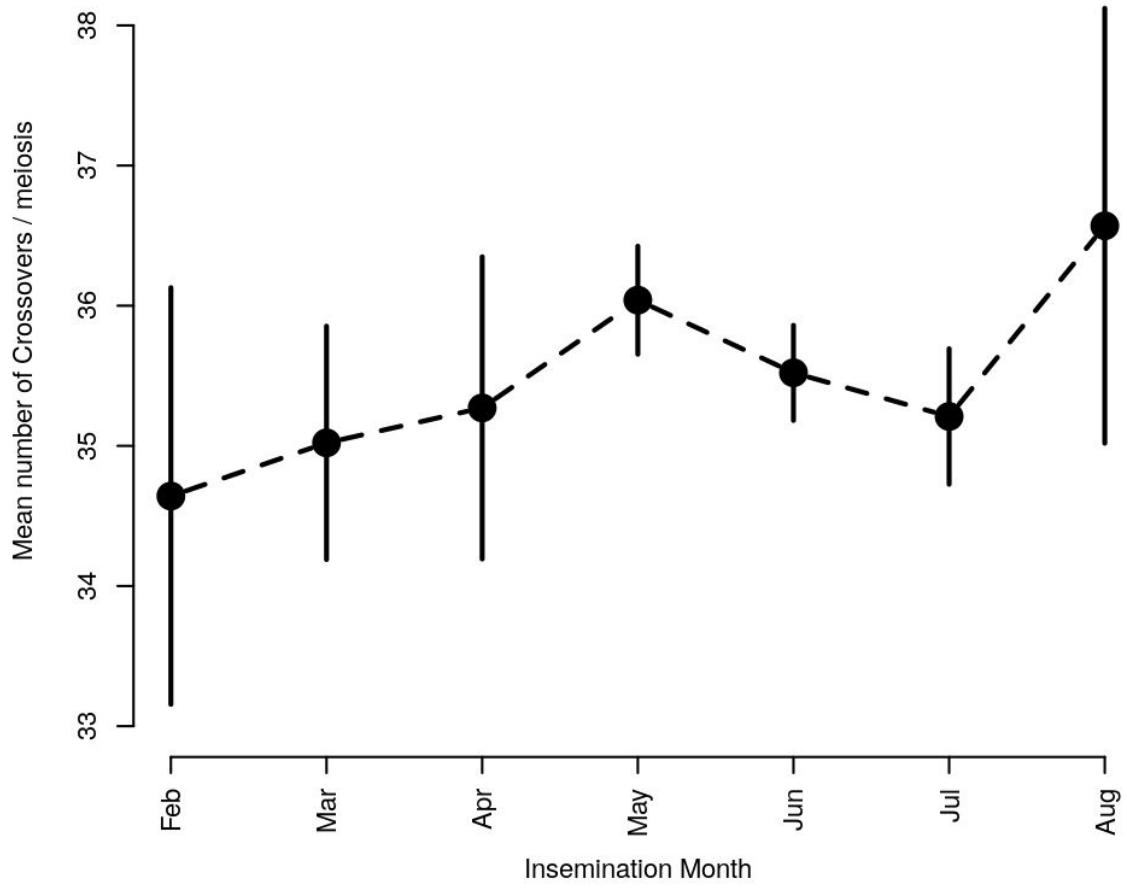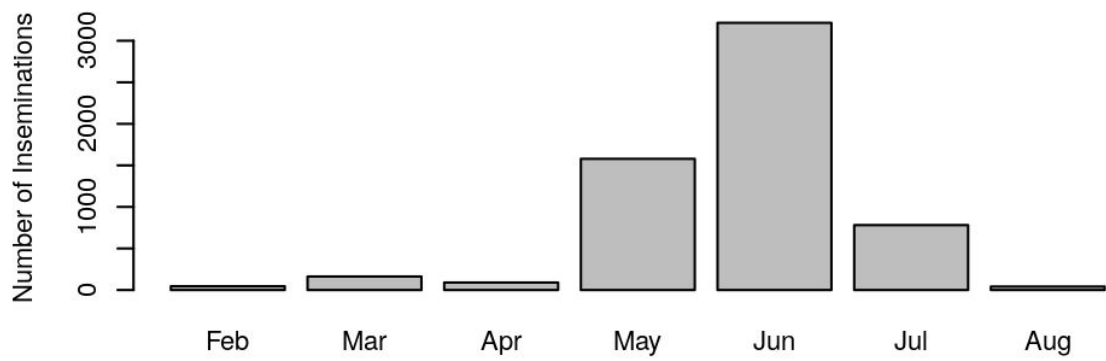

**Figure S11.**

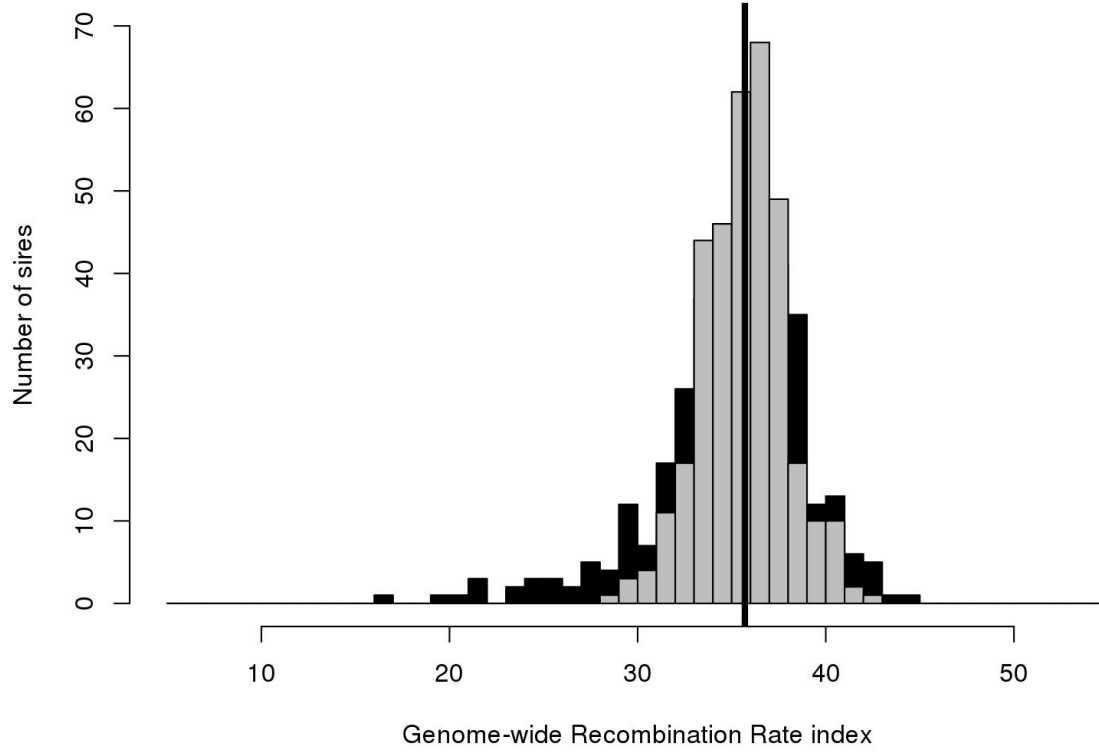

Figure S12.

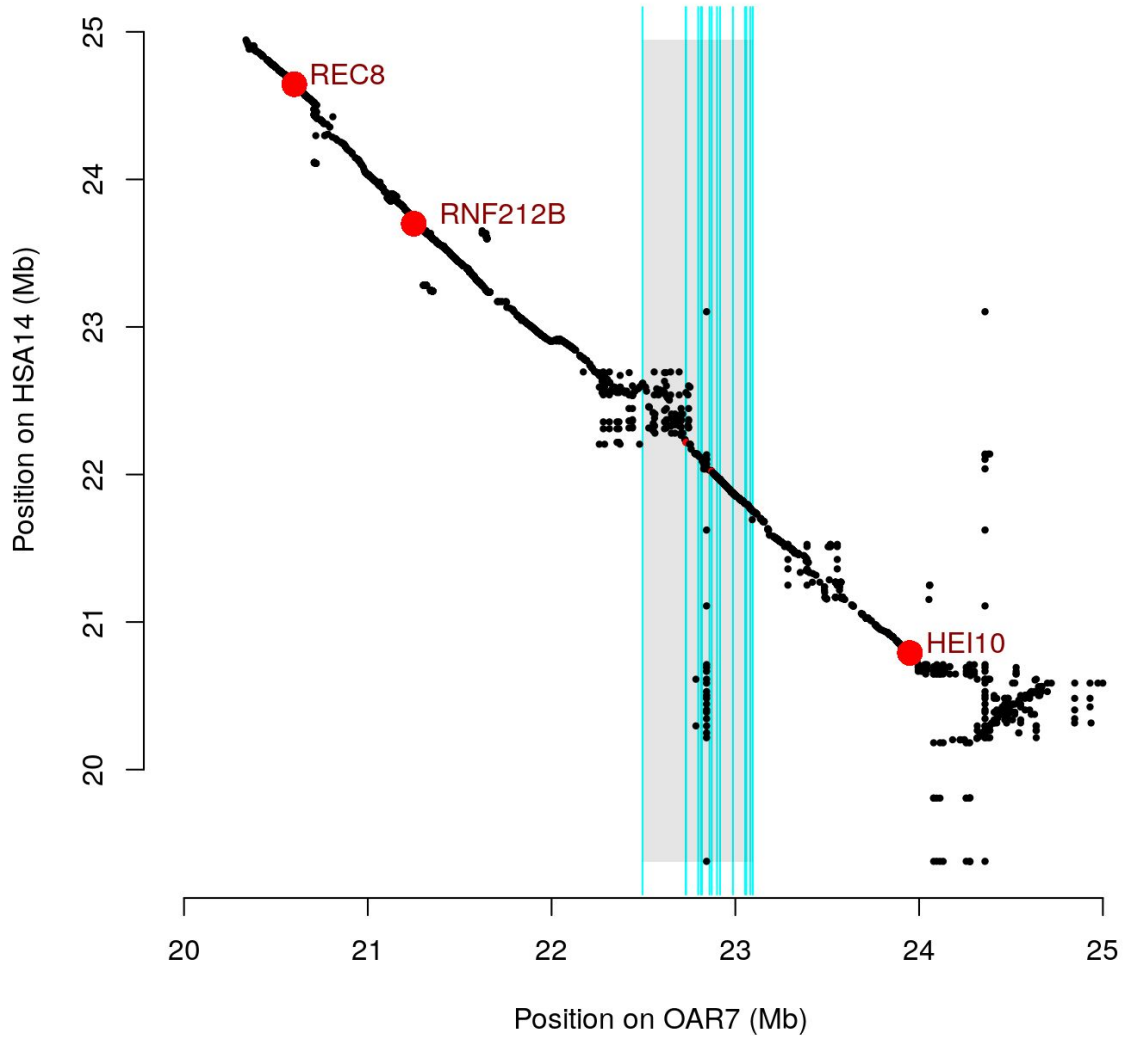

Figure S13.

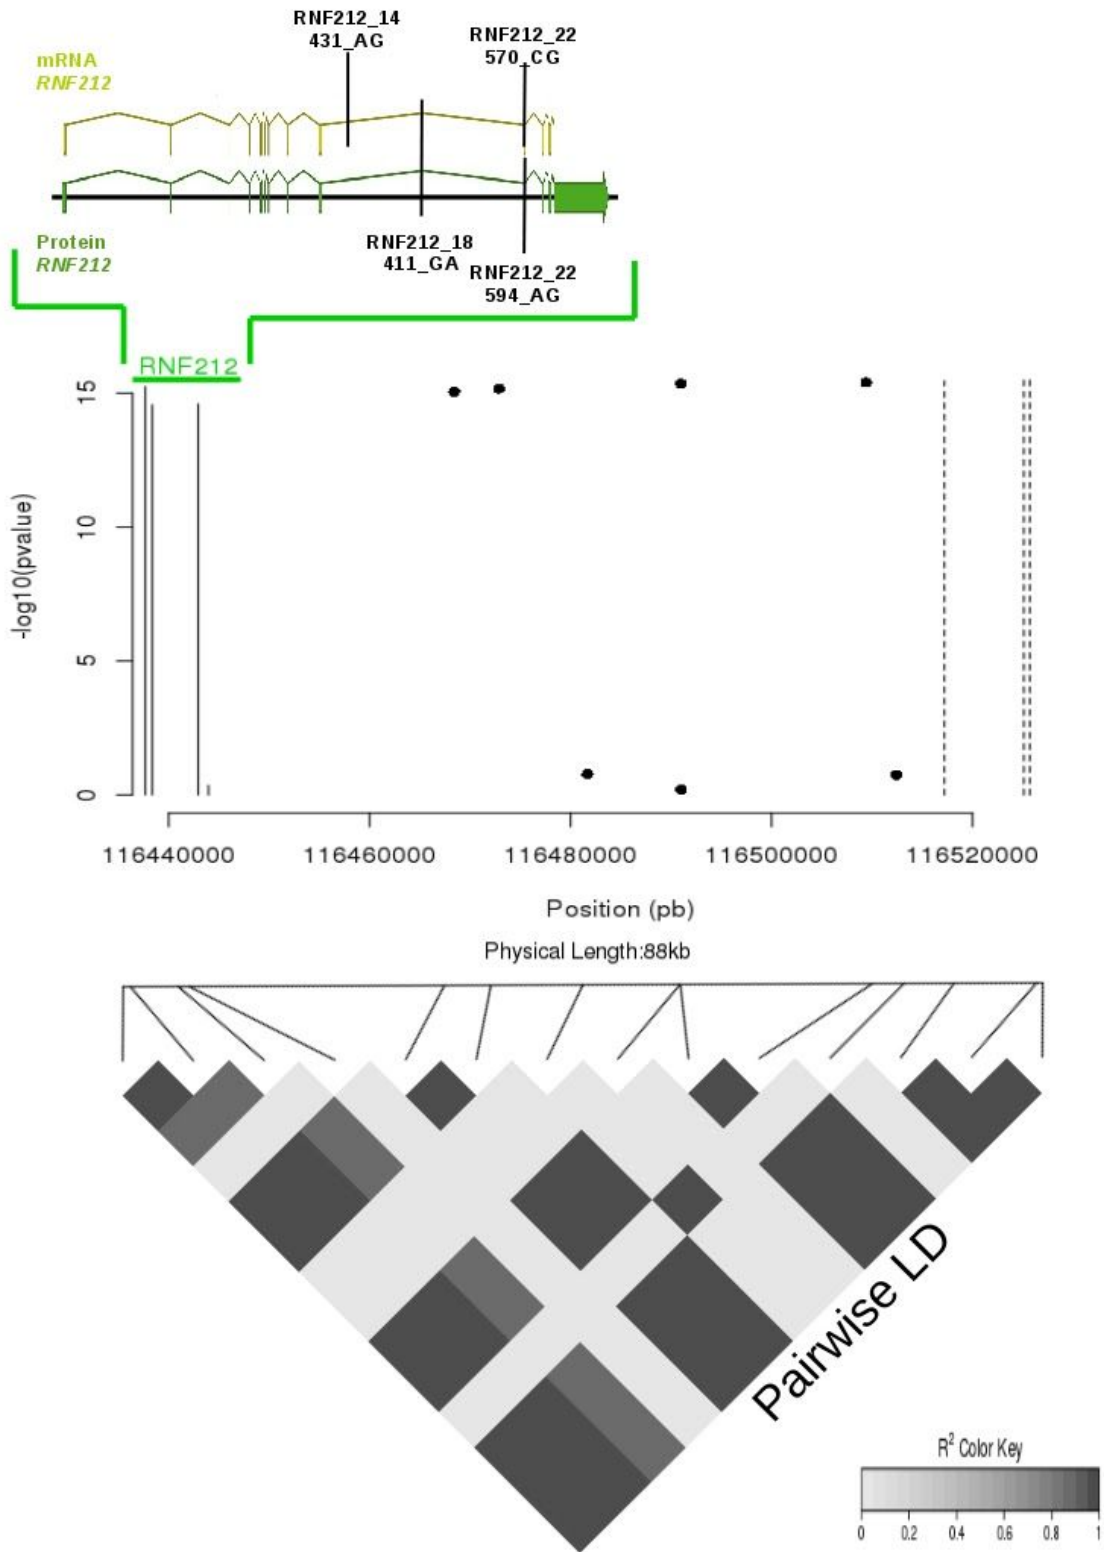

**Table S1: Primers used for resequencing exons of RNF212 and genotyping mutations.**

| Primer Name               | Sequence 5' to 3'        | Amplified fragment | Application              |
|---------------------------|--------------------------|--------------------|--------------------------|
| OAR6_RNF212_1<br>16426312 | GTCCCTTCCTGCCT<br>TGGTAC | 781bp              | sequencing exon1         |
| OAR6_RNF212_1<br>16427093 | CTCACTCCCCCGT<br>CTCCTC  |                    |                          |
| OAR6_RNF212_1<br>16425796 | CAGTGACACCCCA<br>CCCTAAT | 2354bp             | sequencing exon 1-1'     |
| OAR6_RNF212_1<br>16428149 | ACATGAGCCCTGC<br>TTCTGTC |                    |                          |
| OAR6_RNF212_1<br>16428877 | TGGGAGATAATCT<br>GGGCTGA | 434bp              | sequencing exon 2        |
| OAR6_RNF212_1<br>16429310 | TCTCCTAGCACACC<br>AAGCAA |                    |                          |
| OAR6_RNF212_1<br>16430870 | CCCTCGAGTGTTC<br>CTGACT  | 271bp              | sequencing exon 3        |
| OAR6_RNF212_1<br>16431140 | CAGTGTCTCTCGC<br>CTTCAGA |                    |                          |
| OAR6_RNF212_1<br>16432814 | ACTAGATCCCGCAT<br>GCTGTC | 872bp              | sequencing exon 4        |
| OAR6_RNF212_1<br>16433675 | ATGGCTGACCTCA<br>GAGAGGA |                    |                          |
| OAR6_RNF212_1<br>16434284 | GAAGTGGGATTGG<br>TGCAGAT | 1127bp             | sequencing exon 5-5'-6-7 |
| OAR6_RNF212_1<br>16435410 | CACCCCTCTGCTT<br>GGAGAC  |                    |                          |
| OAR6_RNF212_1<br>16435488 | CTAGAGCCCCTGG<br>TGAAGTG | 775bp              | sequencing exon 8        |
| OAR6_RNF212_1<br>16436262 | CCATCAGGCCTCT<br>CCTTG   |                    |                          |
| OAR6_RNF212_1<br>16437201 | CCTTCATCCACTCA<br>CCACCT | 422bp              | sequencing exon 9        |
| OAR6_RNF212_1<br>16437622 | CGCTTCCACAACG<br>ACACC   |                    |                          |
| OAR6_RNF212_1<br>16437703 | CTTGGCTTCCTGTC<br>CTCTTG | 1805bp             | sequencing part intron9  |
| OAR6_RNF212_1<br>16439507 | AGGGCGGCATATC<br>TAAGGTT |                    |                          |



|                           |                           |        |                                                          |
|---------------------------|---------------------------|--------|----------------------------------------------------------|
| OAR6_RNF212_1<br>16437913 | GGTCTCAGGCTGG<br>CAGTTG   | 555bp  | sequencing part intron9                                  |
| OAR6_RNF212_1<br>16437358 | ACTGCTTCCATTCC<br>TCCAGA  |        | genotyping RFLP BsrBI, SNP_14431_AG                      |
| OAR6_RNF212_1<br>16441598 | AAGATG TTCCTTGG<br>CTGGTG | 541bp  | sequencing part intron9                                  |
| OAR6_RNF212_1<br>16442037 | TTTGATCAACCTCC<br>CATTCC  |        | genotyping RFLP RsaI, SNP_18441_GA                       |
| OAR6_RNF212_1<br>16443189 | GCTGTGAGTGGGT<br>CTGGACT  | 865bp  | sequencing part intron9                                  |
| OAR6_RNF212_1<br>16444053 | ACACAGGGACATG<br>AGCACAG  |        |                                                          |
| OAR6_RNF212_1<br>16441598 | AAGATG TTCCTTGG<br>CTGGTG | 437bp  | sequencing part intron9                                  |
| OAR6_RNF212_1<br>16442037 | TTTGATCAACCTCC<br>CATTCC  |        |                                                          |
| OAR6_RNF212_1<br>16445907 | GCCCTCCTCAGAG<br>CCAGA    | 662bp  | sequencing exon 10                                       |
| OAR6_RNF212_1<br>16446568 | CTCCAGGGTGTTCC<br>GTGATG  |        | genotyping RFLP Bsu36I, SNP_22570_CG<br>and SNP_22594_AG |
| OAR6_RNF212_1<br>16445601 | GTTGGTCACGGAA<br>GGGGTAC  | 1522bp | sequencing exon 10-10'                                   |
| OAR6_RNF212_1<br>16445343 | CCACAGGTCCAGC<br>GGGAG    |        |                                                          |
| OAR6_RNF212_1<br>16447360 | GTGCCCTTCGAAA<br>CTGAGAC  | 706bp  | sequencing exon 11, part exon 12                         |
| OAR6_RNF212_1<br>16448065 | CACAGCTGGAGAC<br>ACACGAG  |        |                                                          |

## Description of Supplemental Files:

**File S1:** Recombination maps in the Lacaune male populations on 1 megabase intervals

**File S2:** Recombination maps in the Lacaune male populations on SNP array intervals

**File S3:** Graphical representation of Lacaune recombination maps

**File S4:** Recombination maps of the High-Density SNP array

**File S5:** Recombination rates in Lacaune, Soay, and Soay+Lacaune in SNP array intervals

**File S6:** Genome-wide Single SNP association results in the Lacaune population

**File S7:** Genome-wide Bayesian Sparse Linear Mixed Model results in the Lacaune population

**File S8:** Single SNP association results in the Lacaune population in the distal end of OAR6, including mutations in RNF212

**File S9:** Bayesian Sparse Linear Mixed Model results in the Lacaune population in the distal end of OAR6, including mutations in RNF212

**File S10:** Supplemental methods. Documentation of computer scripts for data analysis.
